# Supplementary material for: Measuring patient safety culture in maternal and child health institutions in China: a qualitative study
Source: PubMed Central journal article supplement — BMJ Open. 2017 Jul 12;7(7):e015458. doi: 10.1136/bmjopen-2016-015458 (PMC5734290; doi:10.1136/bmjopen-2016-015458), 2017-07-12
Supplement: bmjopen-2016-015458.draft_revisions.pdf [file bmjopen-2016-015458.draft_revisions.pdf]

# BMJ Open

## A grounded theory study of patient safety culture in China: a framework and findings from six maternal and child health institutions

|                                 |                                                                                                                                                                                                                                                                                                                                                                                                                                                                                                                                                                                     |
|---------------------------------|-------------------------------------------------------------------------------------------------------------------------------------------------------------------------------------------------------------------------------------------------------------------------------------------------------------------------------------------------------------------------------------------------------------------------------------------------------------------------------------------------------------------------------------------------------------------------------------|
| Journal:                        | <i>BMJ Open</i>                                                                                                                                                                                                                                                                                                                                                                                                                                                                                                                                                                     |
| Manuscript ID                   | bmjopen-2016-015458                                                                                                                                                                                                                                                                                                                                                                                                                                                                                                                                                                 |
| Article Type:                   | Research                                                                                                                                                                                                                                                                                                                                                                                                                                                                                                                                                                            |
| Date Submitted by the Author:   | 06-Dec-2016                                                                                                                                                                                                                                                                                                                                                                                                                                                                                                                                                                         |
| Complete List of Authors:       | Wang, Yuanyuan; Peking University Health Science Centre, Division of Maternal and Child Health, School of Public Health; Peking University Third Hospital, Second Outpatient Department<br>Wang, Yan; Peking University, Division of Maternal and Child Health, School of Public Health<br>Liu, Chaojie; La Trobe University, China Health Program, School of Public Health<br>Liu, Weiwei; Peking University Third Hospital, Second Outpatient Department<br>Shi, Huifeng; Peking University Health Science Centre, Division of Maternal and Child Health, School of Public Health |
| <b>Primary Subject Heading</b>: | Health services research                                                                                                                                                                                                                                                                                                                                                                                                                                                                                                                                                            |
| Secondary Subject Heading:      | Qualitative research                                                                                                                                                                                                                                                                                                                                                                                                                                                                                                                                                                |
| Keywords:                       | Health & safety < HEALTH SERVICES ADMINISTRATION & MANAGEMENT, Organisation of health services < HEALTH SERVICES ADMINISTRATION & MANAGEMENT, QUALITATIVE RESEARCH                                                                                                                                                                                                                                                                                                                                                                                                                  |
|                                 |                                                                                                                                                                                                                                                                                                                                                                                                                                                                                                                                                                                     |

SCHOLARONE™  
Manuscripts

## A grounded theory study of patient safety culture in China: a framework and findings from six maternal and child health institutions

Wang Yuanyuan<sup>1,3</sup>, Wan Yan<sup>1</sup>, Liu Chaojie<sup>1</sup>, Liu Weiwei<sup>3</sup>, Shi Huifeng<sup>1</sup>

1. Peking University Health Science Centre, Division of Maternal and Child Health, School of Public Health, Beijing, China

2. La Trobe University, China Health Program, School of Public Health, Bundoora, Australia

3. Peking University Third Hospital, Second Outpatient Department, Beijing, China

Correspondence to

Prof. Wang Yan; wangyan@bjmu.edu.cn

### ABSTRACT

**Background** Patient safety culture (PSC) is an issue highly concerned for Patient safety (PS) and quality services. Maternal and child health (MCH) is another issue of high concern globally and MCH institutions have been playing a core role in the hierarchical administrative network for MCH in China. The aim of this study was to fundamentally and theoretically explore the concept of PSC in China and build a framework of PSC in MCH institutions.

**Methods** A qualitative approach was conducted based on the grounded theory. Stratified purposive sampling methods were used to recruit participants from six MCH institutions in two provinces (Hebei and Beijing). A total of 118 participants (20 managers, 59 frontlines and 39 patients) were investigated through in-depth interviews. The transcript data were coding analyzed by using of NVivo 8.0 software.

**Results** PS was coded as six hierarchical levels: public security, medical safety, privacy and information security, financial security, psychological safety and demands been met. Patients were more likely to regard psychological safety and financial security which they felt directly. PSC was coded into two parts: the general module (11 dimensions and 61 items) and the MCH specific module (1 dimension and 8 items). Human factors (working perception, continuous learning and staffing) were highlighted by all groups, patient involvement was more valued by patients and the emerging dimension of provider's defensive behaviors was introduced into PSC in this study.

**Conclusions** The framework of PSC could be applied both in MCH institutions and in other institutions with the general module. Multi-conflicts among managers, frontlines, patients and the political and social environment were great threats for PS and PSC. Comprehensive strategies should be launched both within institutions and in a larger context to nourish a safer culture to ensure PS and quality healthcare delivery.

### Strengths and limitations of this study

- This study used a grounded theory study to dig the concept of PSC in China and investigated a large sample for interviews.
- Coding validity and reliability were analyzed to guarantee the analyzing processing.
- Because of less patient safety events reported in interviews, the classification of PS was a rough cognitive pathway of progressive layers, but not an operational taxonomy to be used directly in practice.

### INTRODUCTION

Patient safety (PS) was a key principle in medical practice. Patient safety culture (PSC), defined as 'the

1  
2  
3 shared values, beliefs, norms and procedures related to patient safety among members of the  
4 organization',<sup>1</sup> was a really relevant and important issue for PS highly concerned worldwide.<sup>2-6</sup> PS  
5 climate and PS attitudes were two related terms despite little differences from PSC. Culture was  
6 passed on and relatively enduring;<sup>7</sup> climate provided a snapshot of medical staff' perceptions of  
7 culture;<sup>8-9</sup> and attitudes referred to medical staff' attitudes and perceptions on PS.<sup>10</sup> PS culture,  
8 climate or attitudes, whatever name called, had been proved particularly effective to bring out safer  
9 behaviors, processes and outcomes in a growing body of literatures.<sup>5,11-13</sup>

10  
11 Maternal and child health (MCH) was another highly-concerned issue all over the world. As a core role  
12 in the hierarchical administrative network for MCH, 3,071 MCH institutions had been established in  
13 China by the end of June 2016,<sup>14</sup> which mainly focused on four categories of MCH-related services: (1)  
14 maternity care: including premarital, progestational, pregnant, laboring, postpartum, etc; (2)  
15 children's care: including neonatal, growth and development, nutrition, mental health, ENT care,  
16 rehabilitation, diagnosis and treatment of children's common diseases, TCM applied in children's care,  
17 etc; (3) women's care: including adolescence care, menopause care, geriatric care, mental health,  
18 nutrition, breast care, diagnosis and treatment of women's common diseases, reproductive care, TCM  
19 applied in women's care, etc; (4) family planning: including health education, technical services, guides  
20 of prepotency, contraceptive distribution, information consultation, follow-up, reproductive care,  
21 trainings, etc.. Besides these MCH-related services, MCH institutions consisted of three levels:  
22 province-level, prefecture-level and county-level, which were responsible for MCH administrative  
23 management in the authority area, including health statistics, health education, development and  
24 promotion of appropriate technologies, trainings and supervisions of MCH services provided by other  
25 healthcare and medical institutions in the authority area.<sup>15</sup> A huge amount of policies, regulations,  
26 strategies, financial funding, researches and NGO activities had been devoted to strengthen  
27 infrastructures, equipments and devices, educations and trainings, standardized procedures and  
28 guidelines, network information, etc. to promote quality health services and PS.<sup>16-18</sup> However, little  
29 attention had been paid to PSC in MCH institutions.

30  
31 Assessment tools were helpful to comprehend such an abstract concept of PSC. There had been  
32 several assessment tools developed and personified in various frameworks and dimensions. Among  
33 those tools, Hospital Survey on Patient Safety Culture (HSPSC),<sup>19</sup> Patient Safety Climate in Healthcare  
34 Organizations (PSCHO)<sup>20</sup> and Safety Attitudes Questionnaire (SAQ)<sup>10</sup> were more commonly applied  
35 and multi-versioned in a wide range of countries, institutions and departments.<sup>21-23</sup> All of three tools  
36 had been modified in Chinese versions.<sup>24-28</sup> Those existing tools had provided a variety of frameworks  
37 and dimensions on PSC for researchers and managers to evaluate and intervene in practice.

38  
39 Nevertheless, it was still necessary to conduct such a grounded theory study on PSC of MCH  
40 institutions in China. Besides the specific characteristics of MCH institutions, the important reason was  
41 those Chinese versions had referred more to fixed frameworks in original editions than to culture itself  
42 in Chinese institutions. Since culture had the nature of profundity and abstruseness,<sup>29</sup> it was needed  
43 to fundamentally and theoretically dig the concept of PSC again and again, in order to nourish novel  
44 innovations and strategies for researchers and managers to pursue PS and quality improving.

45  
46 The grounded theory could provide a qualitative approach from original data to general theory,<sup>30</sup>  
47 which was well suitable to building a theoretical framework of PSC of MCH institutions in China. It was  
48 worth mentioning that the significance of qualitative methodologies preferred blossoming 'new  
49 knowledge' than representativeness. What's more, just like many other PSC assessment tools for  
50 specific institutions or units,<sup>31-33</sup> the framework had been supposed to include two modules: one was

1  
2  
3 general module which could be generalized for other hospitals and medical institutions; the other was  
4 specific module which was specialized for MCH institutions.  
5

## 6 **METHODS**

### 7 **Setting and sample**

8  
9 This was a qualitative study based on the grounded theory approach, which had been carried out in 6  
10 MCH institutions in two provinces (Hebei and Beijing), 3 institutions in per province. The filed  
11 investigation was conducted between November 2014 and April 2015. The general characteristics of  
12 these institutions were seen in Appendix Table 1.  
13

14 In this study, stratified purposive sampling methods were applied to recruit participants. In each MCH  
15 institution, firstly all departments had been divided into 4-5 layers: administration departments  
16 (general office, medical administrative department, nursing administrative department, infection  
17 control unit, etc.), MCH clinic departments (pediatric, gynecological, obstetrical, NICU, etc.), MCH  
18 public health departments (children's health care, women's health care, preventive health care, etc.),  
19 auxiliary departments (pharmacy, ultrasound, radiology, laboratory, etc.) and non-MCH clinic  
20 departments (if any, like internal, surgery, dental, TCM, etc.).  
21

22 Then, several administration managers, frontline staff (clinicians, nurses, public health professionals,  
23 midwives, auxiliaries, etc.) and patients (including caregivers of children) were recruited from each  
24 layer to individually participate into in-depth interviews. The sample size depended on whether reach  
25 to the endpoint of information saturation and no new topics emerged. A total of 118 participants  
26 were investigated in this study, including 20 (16.9%) administrative managers, 59 frontline staff (50.0%)  
27 and 39 (33.1%) patients. The general characteristics of these participants were seen in Appendix Table  
28 2-3.  
29  
30

### 31 **Data collection, processing and analysis**

32  
33 In-depth interviews were undertaken with care providers and patients to examine their perceptions of  
34 PS, behaviors and actions to ensure PS, attitudes and perspectives of PSC, and any experience or  
35 feeling regarding PS or PSC. Interview guides, which had been pre-tested and employed in an earlier  
36 study,<sup>34</sup> provided a prompt list of questions, but interviews were flexible, not limited to those  
37 questions.  
38

39 With prior informed consent, each interview was conducted by trained-interviewers within 15-50  
40 minutes, both audio-recorded and literal-recorded at the time. All audio records were transcribed  
41 verbatim, making literal records as supplementary when audio records were not clear.  
42

43 The transcript data were then coding analyzed based on a grounded theory approach<sup>30</sup> by using of  
44 NVivo 8.0 software. The first step was initial coding, in which initial codes originated from raw data or  
45 even original words in order to reflect the panorama of data and were numerous. The second step  
46 was focused coding, in which focused codes condensed key themes of a paragraph materials. Finally,  
47 the third step was axial coding, in which axial codes were further abstracted into categories from  
48 scattered focused codes. In this study, for easy to comprehend and convenient for follow-up studies,  
49 'item' and 'dimension' were adopted, respectively instead of 'focused code' and 'axial code'.  
50  
51  
52

### 53 **Coding validity and reliability**

54 To assure the validity of coding, all transcript data were parallel coded by two researchers.<sup>35 36</sup> Firstly,  
55 two researchers respectively formed an original list of codes from the transcript data; then discussed  
56  
57  
58  
59  
60

1  
2  
3 together and merged their original codes into an operational list of codes; subsequently according to  
4 the operational list of codes, respectively analyzed all transcript data; and finally discuss together  
5 again, adapt the operational codes and then merge their coding results into a framework of final  
6 codes. The modifying process of main dimensions coded by two parallel researchers could be seen in  
7 Appendix Figure 1.

8  
9 The reliability of coding was tested as well. With a probability sampling ratio of 10% approximately, 12  
10 cases of transcript data (including 2 administrative managers, 6 frontline staff and 4 patients) were  
11 randomly selected according to the randomized table. Using the final list of codes, two researchers  
12 respectively coded these 12 cases of transcript data again, and then merge their coding results  
13 together again. The reliability was indicated by percentage agreement ( $=\text{number of agreed codes}/\text{number of all codes} * 100\%$ ),<sup>37 38</sup> both comparing two researchers' codes in re-test and  
14 comparing between merged codes in pre-test and in re-test. The former was termed 'consistency  
15 reliability between researchers', ranging from 63.3% to 100% of each case; and the latter was termed  
16 're-test reliability', ranging from 62.2%-82.5% of each case. Detailed reliability indicators were seen in  
17 Appendix Table 4.  
18  
19  
20  
21

## 22 RESULTS

### 23 Patient safety (PS)

24 In this study, PS was categorized into six hierarchical levels: public security as other public places,  
25 medical safety in the whole process of medical services provided, privacy and information security,  
26 financial security prevented from unnecessary interventions, psychological safety whether unsafe  
27 events happened or not, and demands been met or problems be solved. Managers and frontlines  
28 responded more emphasis on medical safety (65.0% and 52.5%) and public security (55.0% and  
29 35.6%); however, patients responded more concerns on psychological safety whether unsafe events  
30 happened or not (53.8%) and financial security prevented from unnecessary interventions (38.5%).  
31 Detailed codes of PS in total and each group were seen in Table 1.

32 It could be seen that patients were more concerned with psychological safety and financial security  
33 which they felt directly, rather than medical safety and public security which they hardly involved  
34 unless relevant incidents had happened.

35  
36  
37  
38 *'Illness is a painful and stressful experience... I hope doctors or nurses alleviate my anxieties  
39 and doubts by their professional answers and supports in psychology.'*(Patient)

40  
41 *'I often encounter patients suffering from postnatal depression, with kinds of worries and  
42 fears... It may be more effective to psychologically comfort them, even a hug or a slightly  
43 tough, to make patients feel better, rather than to prescribe drugs.'*(Frontline)

44  
45 *'Some doctors would like to prescribe lots of pills, infusions and examinations, whether or  
46 not you should, just only for profit-making.'* (Patient)

47  
48 *'Taking this laboratory examination reporting sheet (in his hand) as an example, I would not  
49 feel safe if not listening to doctors to take such examination. My doctors read it and then  
50 told me 'it is okay and there is nothing to be worried', I felt safe at once no matter whether  
51 necessary to do it or how much money I paid.'*(Patient)  
52  
53  
54  
55  
56  
57  
58  
59  
60

**Table 1 Codes of patient safety in MCH institutions**

| Codes                               | Descriptions of codes                                                                                        | Providers(n1=79)    |                       | Patients<br>(n4=39) | Total<br>(N=118) |
|-------------------------------------|--------------------------------------------------------------------------------------------------------------|---------------------|-----------------------|---------------------|------------------|
|                                     |                                                                                                              | Managers<br>(n2=20) | Frontlines<br>(n3=59) |                     |                  |
| 1.Public security                   | Incidents as happened in general public places, e.g. falls, fires, thefts of property and babies, etc.       | 11(55.0%)           | 21(35.6%)             | 5(12.8%)            | 37(31.4%)        |
| 2.Medical safety                    | Bias of diagnostic & treatment plans and unintended outcomes                                                 | 13(65.0%)           | 31(52.5%)             | 9(23.1%)            | 53(44.9%)        |
| 3. Privacy and information security | Violation of privacy & disclosure of information                                                             | 5(25.0%)            | 3( 5.1%)              | 1( 2.6%)            | 9( 7.6%)         |
| 4. Financial security               | Financial wastages due to unnecessary excessive diagnostic examinations, treatments and health care services | 6(30.0%)            | 6(10.2%)              | 15(38.5%)           | 27(22.9%)        |
| 5. Psychological safety             | Worry or anxious of above unsafe events due to any reason, no matter whether happened or not                 | 5(25.0%)            | 10(16.9%)             | 21(53.8%)           | 36(30.5%)        |
| 6. Demands be met                   | Health demands and relevant problems have been met or solved                                                 | 6(30.0%)            | 12(20.3%)             | 6(15.4%)            | 24(20.3%)        |

### Patient safety culture (PSC)

According to the above concept of PS, PSC was summarized into two modules: general module and MCH specific module. The former included 11 dimensions (61 items) and the latter included 1 dimension (8 items), added up to 12 dimensions (69 items) in total, which were coded as: management support (6 items), regulation and procedure (6 items), staffing (3 items), teamwork (5 items), non-punitive (6 items), openness to adverse events (8 items), risk awareness and warning (6 items), continuous learning (6 items), working perception (5 items), providers' defensive behaviors (4 items), patient involvement (6 items), and MCH specific(8 items). Top 5 dimensions more frequently mentioned by managers were working perception (100.0%), management support (95.0%), regulation and procedure (95.0%), continuous learning (95.0%) and non-punitive (85.0%); top 5 dimensions among frontlines were continuous learning (93.2%), working perception (91.5%), regulation and procedure (91.5%), management support (89.8%) and staffing (88.1%); and top 5 dimensions among patients were working perception (94.9%), patient involvement (87.2%), continuous learning (51.3%), management support (43.6%) and staffing (41.0%). Dimensions of PSC in total and each group were seen in Table 2 (Detailed dimensions and items could be seen in Appendix Table 5).

No matter among managers, frontlines or patients, PSC was heavily attributed to human factors, kind of working perception, continuous learning and staffing, and thereby punishment of individuals were considered as indispensable.

*'We have summarized common causes of medical incidents, including poor communication, lack of knowledge and skills, not obeying guidelines and procedures and so on. All of these causes belong to individual's responsibilities. Punishment to departments or individuals, however to be complained sometimes, is helpful to reduce the number of incidents and to make rules and regulations work.'* (Manager)

*'A person who often makes mistakes is incompetent and should be fired.'* (Manager)

*'Punishment to individuals is fair to others who made no mistake.'* (Frontline)

*'Medical errors and incidents are associated with personal attitudes and skills.'* (Patient)

It is more likely that patients were interested in patient involvement in seeking services than providers, in many ways of informed consents of intervention plans, engagement of decision-making, patient educations, and advocacy of patients' rights and interests.

*'Now young parents are well-educated and usually learn relevant information in internet before seeking care for their babies, they would like to ask for more detailed and accurate explanations than before.'* (Frontline)

*'Communication is very important. No matter what conditions or risks, patients must be informed totally.'* (Patient)

Providers' defensive behaviors was important part of PSC emerging in this study, for example, rejections of patients with high-risk conditions, compromises with patients' irrational requests and introducing unnecessary interventions, in order to avoid disputes and confrontations, which aggravated the scarred relationship between providers and patients and even harmed PS in some occasions.

*'If a pregnant woman refuses to take the blood test in prenatal care, we suggest our doctors to write it down in medical records, which are evidence to avoid dispute in case of anemia.'* (Manager)

1  
2  
3  
4  
5  
6  
7  
8  
9  
10  
11  
12  
13  
14  
15  
16  
17  
18  
19  
20  
21  
22  
23  
24  
25  
26  
27  
28  
29  
30  
31  
32  
33  
34  
35  
36  
37  
38  
39  
40  
41  
42  
43  
44  
45  
46  
47  
48  
49  
50  
51  
52  
53  
54  
55  
56  
57  
58  
59  
60

*'I prefer referrals to superior hospitals as much as possible to prevent premature infants from any unexpected consequence I cannot afford.'*(Frontline)  
*'Doctors rely on machines too much because they don't want take any risk.'*(Patient)

For peer review only



Table 2 Dimensions of patient safety culture in MCH institutions

| Dimensions                        | Descriptions of dimensions                                                  | Providers(n1=79)    |                       | Patients<br>(n4=39) | Total<br>(N=118) |
|-----------------------------------|-----------------------------------------------------------------------------|---------------------|-----------------------|---------------------|------------------|
|                                   |                                                                             | Managers<br>(n2=20) | Frontlines<br>(n3=59) |                     |                  |
| 1. Management support             | Priority to PS; justice of management                                       | 19(95.0%)           | 53(89.8%)             | 17(43.6%)           | 89(75.4%)        |
| 2.Regulation and procedure        | Rationality and continuous amendment; empowerment to frontlines             | 19(95.0%)           | 54(91.5%)             | 13(33.3%)           | 86(72.9%)        |
| 3.Staffing                        | Staffing and workloads                                                      | 16(80.0%)           | 52(88.1%)             | 16(41.0%)           | 84(71.2%)        |
| 4.Teamwork                        | Teamwork within departments, across departments and across institutions     | 13(65.0%)           | 47(79.7%)             | 5(12.8%)            | 65(55.1%)        |
| 5.Non-punitive                    | Non-punitive response to adverse events; cause analysis and feedbacks       | 17(85.0%)           | 42(71.2%)             | 6(15.4%)            | 65(55.1%)        |
| 6.Openness to adverse events      | Adverse events reporting; open communication with colleagues and patients   | 10(50.0%)           | 38(64.4%)             | 0( 0.0%)            | 48(40.7%)        |
| 7.Risk awareness and warning      | Attitudes and awareness of medical risks, errors and potential flaws        | 15(75.0%)           | 44(74.6%)             | 13(33.3%)           | 72(61.0%)        |
| 8.Continuous learning             | Continuous learning; training; not limited to knowledge and skills          | 19(95.0%)           | 55(93.2%)             | 20(51.3%)           | 94(79.7%)        |
| 9.Working perception              | Individual perceptions and affections of his/her work                       | 20(100.0%)          | 54(91.5%)             | 37(94.9%)           | 111(94.1%)       |
| 10.Providers' defensive behaviors | Providers' defensive behaviors to avoid risk or dispute, but may harm PS    | 9(45.0%)            | 22(37.3%)             | 9(23.1%)            | 40(33.9%)        |
| 11.Patient involvement            | Promoting patients to engage in PS                                          | 15(75.0%)           | 44(74.6%)             | 34(87.2%)           | 93(78.8%)        |
| 12.MCH specific                   | MCH specific issues on management support, staffing, teamwork and prejudice | 6(30.0%)            | 6(10.2%)              | 0( 0.0%)            | 12(10.2%)        |

### External influence factors of PS and PSC

Cultures are shared values, beliefs and norms among members of the organization, so all dimensions and items of PSC coded in this study were inner themes of MCH institutions. However, there were also external factors outside of organizations significantly influencing members' values, beliefs, norms and behaviors of PS, summarized in four aspects as bellow.

One aspect was of political factors, including that unreasonable or flawed political regulations brought out heavier workloads or higher risks, limited the development of MCH institutions (like staffing, personnel development, infrastructures and devices, etc.), harmed to patients' benefits and safety (like the accessibility of restricted drugs and services) and that the government did not provide sufficient financial supports to MCH institutions. All of these political factors resulted in so enormous barriers that MCH institutions and staff were hardly able to make PS a priority in practice.

*'With the purpose of social stability, hospitals are always compelled to compensate medical dispute profiteers, regardless who are wrong.'* (Manager)

*'The government usually emphasizes the importance of public health in words but not in action. Because of lack of funds, public health tasks always were done as the least as possible in fact.'*(Manager)

*'After institutional reforms in our region, county-level MCH institutions are not allowed to supply some drugs and services as before, which is a broad-brush way without considering of specific circumstances.'* (Frontline)

Another aspect was of social factors, such as intolerant propaganda of medical accidents spread by mass media and the opposites of providers and patients (distrusts and conflicting interests), which led that providers did not acquire trusts and respects as they should have done and even that safety of themselves were under threats.

*'Our medical staffs are overloaded and the medicine industry is high-risk. However, patients cannot understand these things and medical accidents reported in mass media are always misleading and misinterpreted.'* (Manager)

*'Medical disputes probably happen in any hospital. The doubts of the whole industry spread out in social. Additionally, a small thing could be magnified in the media to aggravate distrusts.'* (Frontline)

An additional aspect was of patients' awareness and capability of participating in PS, for example, shames on illnesses (especially among female patients), conception of exchanges between health and money, incomprehension, distrusts and unreasonable expectations of the medicine, less appreciation of care services than clinic services, passive position in decision-making, whether to be able to express their illnesses and problems clearly, whether to informed consent or comply with intervention plans, and whether recognize the inherent inevitability of making mistakes as a nature of human beings.

*'People don't respect us. For example, some nurses had been physically attacked by parents because of failing to insert the scalp needle at the first time.'* (Manager)

*'Some patients consider treating human bodies as repairing machines. You must assure that they go better or they will make trouble on you.'* (Frontline)

*'I couldn't understand doctors perfectly and had to do as they told me.'* (Patient)

The last but not least aspect was of patients' defensive behaviors. For instance, patients might identify

providers by institutions' grades, magnitudes, environments, attendances, providers' certified qualifications, social reputations and previous experiences from themselves and shared with peers; might take into account costs of time and money; verify providers by hiding symptoms themselves or seeking alternative opinions from other providers, peers and even internet; frequently seeking a provider once confidence built; as so forth. A demonstrative diagram was produced to show how patients made decisions in seeking services at different stages of pre-services, arrivals, encounters and separations, seen in Figure 1.

*'Some patients did not trust us. They would see several doctors to verify mutually.'*  
(Frontline)

*'I choose this hospital because it is a big hospital, with a good environment and many people come here to seek MCH services.'* (Patient)

*'I trust my doctor, because one of my friends is acquainted with him.'* (Patient)

*'Before making decision of giving birth here, we nearly searched all comments of this hospital in internet.'* (Patient)

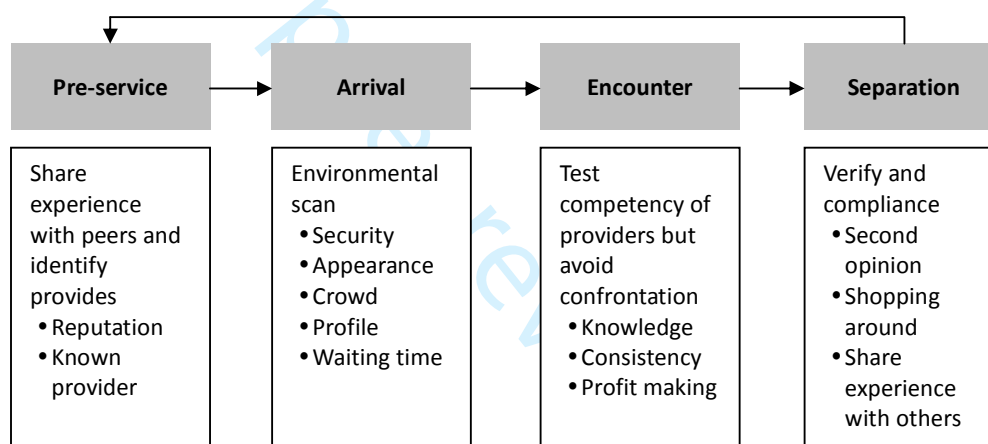

**Figure 1** How patients make decisions in seeking health services

## DISCUSSION

### New findings on PS and PSC

In context of cultures in China, PS could not be limited within the definition of 'the reduction of risk of unnecessary harm (impairment of structure or function of the body and/or any deleterious effect arising there from) associated with health care to an acceptable minimum' given by WHO,<sup>39</sup> but was expanded to become a wider range. Besides physical harms and consequent effects as well concerned in previous studies,<sup>40-42</sup> the original and extended meanings of 'safety' were introduced by providers and patients when they talked about PS in this study. Public security was a kind of environmental scan when people entered hospitals, medical safety was associated with all segments of medical practices, privacy and information security regarded to private rights, financial security originated from the pay-for-profit motivate mechanism and the distrustful relationship between providers and patients,<sup>43</sup> and psychological safety and demands been met reflected further pursuits on PS beyond of avoiding from adverse events as above, while psychological safety to some extents was related with the distrustful relationship between providers and patients and inadequate informed consents.<sup>45 46</sup> Unfortunately, providers were less likely to speak out patient safety events that really happened in

1  
2  
3 their institutions, so the classification of PS was a rough cognitive pathway of progressive layers, but  
4 not an operational taxonomy to be used directly in practice.

5 Besides of MCH specific module, general module in the framework of PSC included 11 dimensions and  
6 61 items. Nine of these eleven dimensions could be revealed faintly from previous assessment tools  
7 of PSC,<sup>10 19 20 47</sup> including management support, regulation and procedure, staffing, teamwork,  
8 non-punitive, openness to adverse events, risk awareness and warning, continuous learning and  
9 working perception, which were overwhelming issues associated with PSC around the world.<sup>48-51</sup>

10 Another issue of patient involvement, which had drawn increasing attentions and evidence to  
11 promote PS in recent years,<sup>52-54</sup> was added as a dimension of PSC in this study. Providers' defensive  
12 behaviors, an additional dimension captured as well, could result in a series of consequences to harm  
13 PS probably, e.g. unnecessary interventions, poor confidence and cooperation between providers and  
14 patients, and professionalism yield to selfishness.<sup>55-57</sup> MCH specific module had underlined that there  
15 was in equality for non-profit public health departments in dimensions of PSC compared with  
16 profit-making clinic departments so that non-profit public health services could be not available or  
17 accessible and a profit-driven culture must damage PS indeed.<sup>43,44</sup>

18 Furthermore, it should be noted that human factors were highlighted in PSC from this study. Both  
19 providers and patients emphasized competency and devotion of individuals and indispensability of  
20 punishment. The system approach considers errors as consequences of 'upstream' systemic factors  
21 rather than causes and blaming individuals is emotionally more satisfying than targeting institutions.<sup>39</sup>  
22 <sup>58 59</sup> The root cause analysis is recommended to focus errors or failures on the system rather than  
23 individuals.<sup>60 61</sup> Meaningwhile, error wisdom is also helpful for individuals to thwart some systemic  
24 failures at the last minute.<sup>62</sup>

### 31 **Conflicts and environmental threats for PS and PSC**

32 Conflicts among managers, frontlines and patients might be a significant threat of PS and PSC, mainly  
33 consisting of two aspects: cognitive conflicts and interest conflicts. Patients' perceptions of PS and PSC  
34 were weaker and patients were more likely to concern about financial security, psychological safety  
35 and patient involvement than providers. Further to compare within providers, frontlines' perceptions  
36 of PS and PSC were weaker in general and frontlines were more likely to talk about staffing, teamwork  
37 and openness to adverse events than managers. Interest conflicts between patients and providers had  
38 been emerged from their defensive behaviors to protect interests themselves and interest conflicts  
39 between frontlines and managers had been mainly displayed in inequality of management support  
40 and staffing. Both cognitive conflicts and interest conflicts would threaten understanding, trust and  
41 cooperation among them and thereby damage quality services and PS, as well proved in previous  
42 researches.<sup>63-67</sup>

43 Furthermore, PSC of the organization could be shaped by political and social factors to a large extent.  
44 A lot of literatures had pinpointed restrictions and conflicts of health services in China with such upper  
45 systemic causes as healthcare system, legal enforcement, incentive mechanism, positive propaganda  
46 and health education to the social public, which had threaten quality services, medical  
47 professionalism, patients' satisfaction and safety, and even safety of the industry and professionals  
48 themselves.<sup>68-73</sup>

### 54 **Strategies for PS learned from this study**

55 Nourishing a safety-centered culture of the organization is essential to ensure PS through encouraging  
56  
57  
58  
59

1  
2  
3 such organizational shared values among individuals. Comprehensive strategies should be launched  
4 both within institutions and in a larger context that is relevant, focusing on improving equality,  
5 non-punitive, patient rights and involvement, confidence and cooperation between providers and  
6 patients, and environmental supports from policies and societies.  
7

#### 8 9 **Limitations and further studies**

10 This study was conducted through a qualitative approach based on grounded theory, which more  
11 likely represented views from researchers themselves<sup>30</sup> and needed further evidence from subsequent  
12 quantitative studies. This study provided a theoretical basis, a qualitative assessment tool of PSC and  
13 an operational taxonomy of PS should be developed in future studies and would be helpful for  
14 researchers and managers to use in practice.  
15

16  
17  
18 **Acknowledgements** The authors wish to acknowledge the contributions of National Center for  
19 Women and Children's Health to organizational coordination, to thank gatekeepers of six MCH  
20 institutions for their supports in field, to thank interviewers, interviewees, interpreters of data and all  
21 those who participated and offered any help in this study.  
22

23  
24 **Contributors** Yuanyuan WANG and Yan WANG conceived the concept and design of the study and  
25 supervised the data collection. Chaojie Liu and Weiwei LIU participated in the design of the study and  
26 interview tools. Huifeng SHI participated in the collection and analysis of data. Yuanyuan Wang led the  
27 data analyses and writing of the manuscript. All authors contributed to the drafting of the article and  
28 read and approved the final version of the manuscript.  
29

30  
31 **Funding** This study was funded by Beijing Municipal Education Commission, Beijing Key Disciplines  
32 (Maternal, Child and Adolescent Health).  
33

34  
35 **Competing interests** None declared.  
36

37  
38 **Ethics approval** This study protocol was approved by Peking University Institutional Review Board and  
39 Peking University Third Hospital Medical Science Research Ethics Committee.  
40

41  
42 **Data Sharing Statement** The data supporting the conclusions of this article are included within the  
43 article in the form of interview excerpts. Full interview transcripts remain the property of Division of  
44 Maternal and Child Health, School of Public Health, Peking University Health Science Centre, which are  
45 accessible to contact with the corresponding author Prof. Wang Yan, email: wangyan@bjmu.edu.cn  
46  
47  
48  
49  
50  
51  
52  
53  
54  
55  
56  
57  
58  
59  
60

## REFERENCES

1. Weaver SJ, Lubomksi LH, Wilson RF, et al. Promoting a culture of safety as a patient safety strategy: a systematic review. *Ann Intern Med* 2013;158(5 Pt 2):369-74. doi: 10.7326/0003-4819-158-5-201303051-00002
2. Kristensen S, Christensen KB, Jaquet A, et al. Strengthening leadership as a catalyst for enhanced patient safety culture: a repeated cross-sectional experimental study. *BMJ Open* 2016;6(5):e010180. doi: 10.1136/bmjopen-2015-010180
3. Azami-Aghdash S, Ebadifard Azar F, Rezapour A, et al. Patient safety culture in hospitals of Iran: a systematic review and meta-analysis. *Med J Islam Repub Iran* 2015;29:251.
4. Azer SA, Baharoon S. Medical error reporting: is it about physicians' knowledge and their practice, or patient safety culture in the workplace? *East Mediterr Health J* 2016;22(3):228-9.
5. Verbakel NJ, Langelaan M, Verheij TJ, et al. Effects of patient safety culture interventions on incident reporting in general practice: a cluster randomised trial. *Br J Gen Pract* 2015;65(634):e319-29. doi: 10.3399/bjgp15X684853
6. Bishop AC, Cregan BR. Patient safety culture: finding meaning in patient experiences. *Int J Health Care Qual Assur* 2015;28(6):595-610. doi: 10.1108/IJHCQA-03-2014-0029
7. McKeown C. Patient safety culture: theory, methods & application. *Ergonomics* 2016;59(8):1132-3. doi: 10.1080/00140139.2015.1130412
8. Singer SJ, Vogus TJ. Safety climate research: taking stock and looking forward. *BMJ Qual Saf* 2013;22(1):1-4. doi: 10.1136/bmjqs-2012-001572
9. Halligan M, Zecevic A. Safety culture in healthcare: a review of concepts, dimensions, measures and progress. *BMJ Qual Saf* 2011;20(4):338-43. doi: 10.1136/bmjqs.2010.040964
10. Sexton JB, Helmreich RL, Neilands TB, et al. The Safety Attitudes Questionnaire: psychometric properties, benchmarking data, and emerging research. *BMC Health Serv Res* 2006;6:44. doi: 10.1186/1472-6963-6-44
11. El-Jardali F, Dimassi H, Jamal D, et al. Predictors and outcomes of patient safety culture in hospitals. *BMC Health Serv Res* 2011;11:45. doi: 10.1186/1472-6963-11-45
12. Singer S, Lin S, Falwell A, et al. Relationship of safety climate and safety performance in hospitals. *Health Serv Res* 2009;44(2 Pt 1):399-421. doi: 10.1111/j.1475-6773.2008.00918.x
13. Hill MR, Roberts MJ, Alderson ML, et al. Safety culture and the 5 steps to safer surgery: an intervention study. *Br J Anaesth* 2015;114(6):958-62. doi: 10.1093/bja/aev063
14. The number of medical and health institutions in the country by the end of June 2016 - National Health and Family Planning Commission of the People's Republic of China 2016 [Available from: <http://www.nhfpc.gov.cn/mohwsbwstjxxzx/s7967/201608/87343c7d63ce41ca8d8fddf7a5db66b7.shtml>].
15. Guidance on standardized organizational construction and management of maternal and child health service institutions - National Health and Family Planning Commission of the People's Republic of China 2016 [Available from: <http://www.nhfpc.gov.cn/fys/s3581/201512/a0dcaf1f20624769a9a3b2dafa0280ab.shtml>].
16. Guo Y, Bai J, Na H. The history of China's maternal and child health care development. *Semin Fetal Neonatal Med* 2015;20(5):309-14. doi: 10.1016/j.siny.2015.07.006
17. Feng XL, Theodoratou E, Liu L, et al. Social, economic, political and health system and program determinants of child mortality reduction in China between 1990 and 2006: A systematic

- analysis. *J Glob Health* 2012;2(1):010405. doi: 10.7189/jogh.02.010405
18. Ren Z, Song P, Theodoratou E, et al. China's human resources for maternal and child health: a national sampling survey. *BMC Health Serv Res* 2015;15:561. doi: 10.1186/s12913-015-1238-9
  19. Wagner C, Smits M, Sorra J, et al. Assessing patient safety culture in hospitals across countries. *Int J Qual Health Care* 2013;25(3):213-21. doi: 10.1093/intqhc/mzt024
  20. Singer SJ, Gaba DM, Geppert JJ, et al. The culture of safety: results of an organization-wide survey in 15 California hospitals. *Qual Saf Health Care* 2003;12(2):112-8.
  21. Quillivan RR, Burlison JD, Browne EK, et al. Patient Safety Culture and the Second Victim Phenomenon: Connecting Culture to Staff Distress in Nurses. *Jt Comm J Qual Patient Saf* 2016;42(8):377-86.
  22. Hoffmann B, Miessner C, Albay Z, et al. Impact of individual and team features of patient safety climate: a survey in family practices. *Ann Fam Med* 2013;11(4):355-62. doi: 10.1370/afm.1500
  23. Nguyen G, Gambashidze N, Ilyas SA, et al. Validation of the safety attitudes questionnaire (short form 2006) in Italian in hospitals in the northeast of Italy. *BMC Health Serv Res* 2015;15:284. doi: 10.1186/s12913-015-0951-8
  24. Chen IC, Li HH. Measuring patient safety culture in Taiwan using the Hospital Survey on Patient Safety Culture (HSOPSC). *BMC Health Serv Res* 2010;10:152. doi: 10.1186/1472-6963-10-152
  25. Nie Y, Mao X, Cui H, et al. Hospital survey on patient safety culture in China. *BMC Health Serv Res* 2013;13:228. doi: 10.1186/1472-6963-13-228
  26. Zhu J, Li L, Zhao H, et al. Development of a patient safety climate survey for Chinese hospitals: cross-national adaptation and psychometric evaluation. *BMJ Qual Saf* 2014;23(10):847-56. doi: 10.1136/bmjqs-2013-002664
  27. Zhou P, Bundorf MK, Gu J, et al. Survey on patient safety climate in public hospitals in China. *BMC Health Serv Res* 2015;15:53. doi: 10.1186/s12913-015-0710-x
  28. GUO X ZW. Revision of Safety Attitudes Questionnaire and ... *Chinese Journal of Nursing Education* 2010(04):151-54.
  29. Nieva VF, Sorra J. Safety culture assessment: a tool for improving patient safety in healthcare organizations. *Qual Saf Health Care* 2003;12 Suppl 2:ii17-23.
  30. Charmaz K. *Constructing grounded theory*. 2nd edition ed. London ; Thousand Oaks, Calif.: Sage 2014.
  31. Blegen MA PG, Rosse J. Safety Climate on Hospital Units: A New Measure. In: Henriksen K, Battles JB, Marks ES, et al., eds. *Advances in Patient Safety: From Research to Implementation (Volume 4: Programs, Tools, and Products)*: Agency for Healthcare Research and Quality (US) 2005.
  32. Bondevik GT, Hofoss D, Hansen EH, et al. The safety attitudes questionnaire - ambulatory version: psychometric properties of the Norwegian translated version for the primary care setting. *BMC Health Serv Res* 2014;14:139. doi: 10.1186/1472-6963-14-139
  33. Cappelen K, Aase K, Storm M, et al. Psychometric properties of the Nursing Home Survey on Patient Safety Culture in Norwegian nursing homes. *BMC Health Serv Res* 2016;16:446. doi: 10.1186/s12913-016-1706-x
  34. Liu C, Liu W, Wang Y, et al. Patient safety culture in China: a case study in an outpatient setting in Beijing. *BMJ Qual Saf* 2014;23(7):556-64. doi: 10.1136/bmjqs-2013-002172

- 1
- 2
- 3 35. Dovey SM, Meyers DS, Phillips RL, et al. A preliminary taxonomy of medical errors in family
- 4 practice. *Qual Saf Health Care* 2002;11(3):233-8.
- 5
- 6 36. Clayman ML, Makoul G, Harper MM, et al. Development of a shared decision making coding
- 7 system for analysis of patient-healthcare provider encounters. *Patient Educ Couns*
- 8 2012;88(3):367-72. doi: 10.1016/j.pec.2012.06.011
- 9
- 10 37. Kirilenko AP, Stepchenkova S. Inter-Coder Agreement in One-to-Many Classification: Fuzzy Kappa.
- 11 *PLoS One* 2016;11(3):e0149787. doi: 10.1371/journal.pone.0149787
- 12
- 13 38. Bottle A, Jarman B, Aylin P. Hospital standardized mortality ratios: sensitivity analyses on the
- 14 impact of coding. *Health Serv Res* 2011;46(6pt1):1741-61. doi:
- 15 10.1111/j.1475-6773.2011.01295.x
- 16
- 17 39. World Health Organization., WHO Patient Safety. Patient safety curriculum guide:
- 18 multi-professional edition. Geneva: World Health Organization 2011.
- 19
- 20 40. Klemp K, Dovey S, Valderas JM, et al. Developing a patient safety incident classification system for
- 21 primary care. A literature review and Delphi-survey by the LINNEAUS collaboration on patient
- 22 safety in primary care. *Eur J Gen Pract* 2015;21 Suppl:35-8. doi:
- 23 10.3109/13814788.2015.1043723
- 24
- 25 41. Keriél-Gascou M, Brami J, Chanelière M, et al. [Which definition and taxonomy of incident to use
- 26 for a French reporting system in primary care settings?]. *Rev Epidemiol Sante Publique*
- 27 2014;62(1):41-52. doi: 10.1016/j.respe.2013.10.007
- 28
- 29 42. Mikkelsen KL, Thommesen J, Andersen HB. Validating the Danish adaptation of the World Health
- 30 Organization's International Classification for Patient Safety classification of patient safety
- 31 incident types. *Int J Qual Health Care* 2013;25(2):132-40. doi: 10.1093/intqhc/mzs080
- 32
- 33 43. McGregor MJ, Cohen M, Stocks-Rankin CR, et al. Complaints in for-profit, non-profit and public
- 34 nursing homes in two Canadian provinces. *Open Med* 2011;5(4):e183-92.
- 35
- 36 44. Comondore VR, Devereaux PJ, Zhou Q, et al. Quality of care in for-profit and not-for-profit nursing
- 37 homes: systematic review and meta-analysis. *BMJ* 2009;339:b2732.
- 38
- 39 45. Duckett J, Hunt K, Munro N, et al. Does distrust in providers affect health-care utilization in China?
- 40 *Health Policy Plan* 2016;31(8):1001-9. doi: 10.1093/heapol/czw024
- 41
- 42 46. Narveson J. Comment on Levy's 'Forced to be free? Increasing patient autonomy by constraining it'.
- 43 *J Med Ethics* 2014;40(5):302-3. doi: 10.1136/medethics-2011-100346
- 44
- 45 47. Parker D. Managing risk in healthcare: understanding your safety culture using the Manchester
- 46 Patient Safety Framework (MaPSaF). *J Nurs Manag* 2009;17(2):218-22. doi:
- 47 10.1111/j.1365-2834.2009.00993.x
- 48
- 49 48. Zaheer S, Ginsburg L, Chuang YT, et al. Patient safety climate (PSC) perceptions of frontline staff in
- 50 acute care hospitals: examining the role of ease of reporting, unit norms of openness, and
- 51 participative leadership. *Health Care Manage Rev* 2015;40(1):13-23. doi:
- 52 10.1097/HMR.0000000000000005
- 53
- 54 49. Taylor JA, Dominici F, Agnew J, et al. Do nurse and patient injuries share common antecedents? An
- 55 analysis of associations with safety climate and working conditions. *BMJ Qual Saf*
- 56 2012;21(2):101-11. doi: 10.1136/bmjqs-2011-000082
- 57
- 58 50. Wami SD, Demssie AF, Wassie MM, et al. Patient safety culture and associated factors: A
- 59 quantitative and qualitative study of healthcare workers' view in Jimma zone Hospitals,
- 60 Southwest Ethiopia. *BMC Health Serv Res* 2016;16:495. doi: 10.1186/s12913-016-1757-z
51. Morrow KJ, Gustavson AM, Jones J. Speaking up behaviours (safety voices) of healthcare workers:



- 1  
2  
3 A metasynthesis of qualitative research studies. *Int J Nurs Stud* 2016;64:42-51. doi:  
4 10.1016/j.ijnurstu.2016.09.014
- 5 52. Davis RE, Jacklin R, Sevdalis N, et al. Patient involvement in patient safety: what factors influence  
6 patient participation and engagement? *Health Expect* 2007;10(3):259-67. doi:  
7 10.1111/j.1369-7625.2007.00450.x
- 8 53. Sahlström M, Partanen P, Rathert C, et al. Patient participation in patient safety still missing:  
9 Patient safety experts' views. *Int J Nurs Pract* 2016;22(5):461-69. doi: 10.1111/ijn.12476
- 10 54. Vaismoradi M, Jordan S, Kangasniemi M. Patient participation in patient safety and nursing input -  
11 a systematic review. *J Clin Nurs* 2015;24(5-6):627-39. doi: 10.1111/jocn.12664
- 12 55. Deng W, Klemetti R, Long Q, et al. Cesarean section in Shanghai: women's or healthcare provider's  
13 preferences? *BMC Pregnancy Childbirth* 2014;14:285. doi: 10.1186/1471-2393-14-285
- 14 56. Renkema E, Broekhuis M, Ahaus K. Conditions that influence the impact of malpractice litigation  
15 risk on physicians' behavior regarding patient safety. *BMC Health Serv Res* 2014;14:38. doi:  
16 10.1186/1472-6963-14-38
- 17 57. Ortashi O, Virdee J, Hassan R, et al. The practice of defensive medicine among hospital doctors in  
18 the United Kingdom. *BMC Med Ethics* 2013;14:42. doi: 10.1186/1472-6939-14-42
- 19 58. Reason J. Human error: models and management. *BMJ* 2000;320(7237):768-70.
- 20 59. Reason J. Safety in the operating theatre - Part 2: human error and organisational failure. *Qual Saf*  
21 *Health Care* 2005;14(1):56-60.
- 22 60. Charles R, Hood B, Derosier JM, et al. How to perform a root cause analysis for workup and future  
23 prevention of medical errors: a review. *Patient Saf Surg* 2016;10:20. doi:  
24 10.1186/s13037-016-0107-8
- 25 61. Holdsworth MT, Bond R, Parikh S, et al. Root Cause Analysis Design and Its Application to  
26 Pharmacy Education. *Am J Pharm Educ* 2015;79(7):99. doi: 10.5688/ajpe79799
- 27 62. Reason J. Beyond the organisational accident: the need for "error wisdom" on the frontline. *Qual*  
28 *Saf Health Care* 2004;13 Suppl 2:ii28-33. doi: 10.1136/qhc.13.suppl\_2.ii28
- 29 63. Van Bogaert P, Peremans L, Diltour N, et al. Staff Nurses' Perceptions and Experiences about  
30 Structural Empowerment: A Qualitative Phenomenological Study. *PLoS One*  
31 2016;11(4):e0152654. doi: 10.1371/journal.pone.0152654
- 32 64. Oduro-Mensah E, Kwamie A, Antwi E, et al. Care decision making of frontline providers of maternal  
33 and newborn health services in the greater Accra region of Ghana. *PLoS One*  
34 2013;8(2):e55610. doi: 10.1371/journal.pone.0055610
- 35 65. Rose DE, Tisnado DM, Tao ML, et al. Prevalence, predictors, and patient outcomes associated with  
36 physician co-management: findings from the Los Angeles Women's Health Study. *Health Serv*  
37 *Res* 2012;47(3 Pt 1):1091-116. doi: 10.1111/j.1475-6773.2011.01359.x
- 38 66. Lee King PA, Cederbaum JA, Kurzban S, et al. Role of patient treatment beliefs and provider  
39 characteristics in establishing patient-provider relationships. *Fam Pract* 2015;32(2):224-31.  
40 doi: 10.1093/fampra/cmu085
- 41 67. Andoh-Adjei FX, Cornelissen D, Asante FA, et al. Does capitation payment under national health  
42 insurance affect subscribers' trust in their primary care provider? a cross-sectional survey of  
43 insurance subscribers in Ghana. *BMC Health Serv Res* 2016;16(1):437. doi:  
44 10.1186/s12913-016-1622-0
- 45 68. Zhang L, Stone TE, Zhang J. Understanding the rise of Yiniao in China: A commentary on the little  
46 known phenomenon of healthcare violence. *Nurs Health Sci* 2016 doi: 10.1111/nhs.12311
- 47  
48  
49  
50  
51  
52  
53  
54  
55  
56  
57  
58  
59  
60

- 1  
2  
3 69. Peng W, Ding G, Tang Q, et al. Continuing violence against medical personnel in China: A flagrant  
4 violation of Chinese law. *Biosci Trends* 2016;10(3):240-3. doi: 10.5582/bst.2016.01094  
5  
6 70. Hui EC. The contemporary healthcare crisis in China and the role of medical professionalism. *J Med*  
7 *Philos* 2010;35(4):477-92. doi: 10.1093/jmp/jhq031  
8  
9 71. Huong DB, Phuong NK, Bales S, et al. Rural health care in Vietnam and China: conflict between  
10 market reforms and social need. *Int J Health Serv* 2007;37(3):555-72.  
11  
12 72. Hou J, Michaud C, Li Z, et al. Transformation of the education of health professionals in China:  
13 progress and challenges. *Lancet* 2014;384(9945):819-27. doi:  
14 10.1016/S0140-6736(14)61307-6  
15  
16 73. Violence against doctors: Why China? Why now? What next? *Lancet* 2014;383(9922):1013. doi:  
17 10.1016/S0140-6736(14)60501-8  
18  
19  
20  
21  
22  
23  
24  
25  
26  
27  
28  
29  
30  
31  
32  
33  
34  
35  
36  
37  
38  
39  
40  
41  
42  
43  
44  
45  
46  
47  
48  
49  
50  
51  
52  
53  
54  
55  
56  
57  
58  
59  
60

Appendix Table 1 The general characteristics of six MCH institutions

| Province | MCH institution | Number of |      |                             |                               |                             |
|----------|-----------------|-----------|------|-----------------------------|-------------------------------|-----------------------------|
|          |                 | Staff     | Beds | Outpatients (*1000per year) | Hospitalized (*1000 per year) | Deliveries (*1000 per year) |
| Hebei    | SJZ             | 1022      | 450  | 520                         | 21                            | 16                          |
|          | MC              | 90        | 40   | 15                          | 1.6                           | 1                           |
| Beijing  | XH              | 110       | 60   | 120                         | 2                             | 1                           |
|          | HD              | 729       | 460  | 740                         | 20                            | 14                          |
|          | CY              | 443       | 125  | 280                         | 6                             | 4                           |
|          | FT              | 362       | 120  | 280                         | 3.5                           | 2.2                         |

\*Rough data provided by administrative managers of those MCH institutions.

Appendix Table 2 The general characteristics of 118 participants

| Characteristics | Providers(n1=79)  |                    | Patients (n4=39) | Total (N=118) |           |
|-----------------|-------------------|--------------------|------------------|---------------|-----------|
|                 | Managers (n2=20)  | Frontlines (n3=59) |                  |               |           |
| Sex             | Male              | 5(25.0%)           | 3( 5.1%)         | 21(17.8%)     |           |
|                 | Female            | 15(75.0%)          | 56(94.9%)        | 97(82.2%)     |           |
| Age             | 20-29 years       | 0( 0.0%)           | 8(13.6%)         | 24(20.3%)     |           |
|                 | 30-39 years       | 7(35.0%)           | 33(55.9%)        | 53(44.9%)     |           |
|                 | 40-49 years       | 9(45.0%)           | 16(27.1%)        | 26(22.0%)     |           |
|                 | 50-59 years       | 3(15.0%)           | 1( 1.7%)         | 8( 6.8%)      |           |
|                 | 60 years or above | 1( 5.0%)           | 1( 1.7%)         | 2( 1.7%)      |           |
|                 | Missing           | 0( 0.0%)           | 0( 0.0%)         | 5(12.8%)      | 5( 4.2%)  |
| Education       | Primaryorunder    | 0( 0.0%)           | 0( 0.0%)         | 4(10.3%)      | 4( 3.4%)  |
|                 | Secondary         | 0( 0.0%)           | 0( 0.0%)         | 7(17.9%)      | 7( 5.9%)  |
|                 | Juniorcollege     | 3(15.0%)           | 23(39.0%)        | 6(15.4%)      | 32(27.1%) |
|                 | Undergraduate     | 10(50.0%)          | 25(42.4%)        | 6(15.4%)      | 41(34.7%) |
|                 | Masterorabove     | 2(10.0%)           | 9(15.3%)         | 2( 5.1%)      | 13(11.0%) |
|                 | Missing           | 5(25.0%)           | 2( 3.4%)         | 14(35.9%)     | 21(17.8%) |

Appendix Table 3 Other general characteristics of 79 care providers

| Characteristics     |                   | Administrative managers<br>(n2=20) | Frontline staff<br>(n3=59) | Total<br>(n1=79) |
|---------------------|-------------------|------------------------------------|----------------------------|------------------|
| Working years       | 0-4 years         | 0( 0.0%)                           | 3( 5.1%)                   | 3( 3.8%)         |
|                     | 5-9 years         | 3(15.0%)                           | 14(23.7%)                  | 17(21.5%)        |
|                     | 10 years or above | 17(85.0%)                          | 42(71.2%)                  | 59(74.7%)        |
| Professional title* | Clinicians        | 7(35.0%)                           | 14(23.7%)                  | 21(26.6%)        |
|                     | Public health     | 2(10.0%)                           | 15(25.4%)                  | 17(21.5%)        |
|                     | Nurses            | 5(25.0%)                           | 21(35.6%)                  | 26(32.9%)        |
|                     | Administrative    | 6(30.0%)                           | 0( 0.0%)                   | 6( 7.6%)         |
|                     | Others            | 0( 0.0%)                           | 9(15.3%)                   | 9(11.4%)         |

\*Professional title is a qualification authenticated by health administrative bureaus, which qualifies medical professionals' specialty legally. Most administrative managers of medical institutions in China had been promoted from frontline staff rather than specialized administrative managers.

Appendix Table 4 The coding reliability of 12 re-test cases

| No. of cases | Group                  | Consistency reliability between researchers | Re-test reliability |
|--------------|------------------------|---------------------------------------------|---------------------|
| 1            | Administrative manager | 85.0%                                       | 68.2%               |
| 2            | Administrative manager | 68.8%                                       | 66.7%               |
| 3            | Frontline staff        | 79.4%                                       | 62.2%               |
| 4            | Frontline staff        | 85.0%                                       | 73.9%               |
| 5            | Frontline staff        | 66.7%                                       | 69.2%               |
| 6            | Frontline staff        | 63.3%                                       | 66.1%               |
| 7            | Frontline staff        | 75.6%                                       | 76.1%               |
| 8            | Frontline staff        | 82.9%                                       | 82.5%               |
| 9            | Patient                | 100.0%                                      | 66.7%               |
| 10           | Patient                | 88.2%                                       | 73.7%               |
| 11           | Patient                | 92.9%                                       | 62.5%               |
| 12           | Patient                | 75.0%                                       | 63.9%               |

1  
2  
3  
4  
5  
6  
7  
8  
9  
10  
11  
12  
13  
14  
15  
16  
17  
18  
19  
20  
21  
22  
23  
24  
25  
26  
27  
28  
29  
30  
31  
32  
33  
34  
35  
36  
37  
38  
39  
40  
41  
42  
43  
44  
45  
46  
47

|  | Original codes                               |                                | Operational codes              | Final codes                                              |
|--|----------------------------------------------|--------------------------------|--------------------------------|----------------------------------------------------------|
|  | <i>Researcher A</i>                          | <i>Researcher B</i>            |                                |                                                          |
|  | Concept of PS                                | Concept of PS                  | Concept of PS                  | Concept of PS                                            |
|  | Patient factors                              | Environmental factors          | Environmental factors          | Management support<br>Regulation and procedure           |
|  | Medical industry                             | Management support             | Organizational structures      | Staffing                                                 |
|  | Policies and regulations                     | Working atmosphere             | Working atmosphere             | Teamwork                                                 |
|  | Legal                                        | Individual factors             | Individual factors             | Non-punitive                                             |
|  | social                                       | Providers' defensive behaviors | Providers' defensive behaviors | Openness to adverse events<br>Risk awareness and warning |
|  | Organizational goals                         | Patients' defensive behaviors  | Patients' defensive behaviors  | Continuous learning                                      |
|  | Organizational structures                    |                                |                                | Working perception                                       |
|  | Organizational environment and facilities    |                                |                                | Providers' defensive behaviors                           |
|  | Individual perceptions, attitudes, behaviors |                                |                                | Patient involvement<br>MCH specific                      |
|  |                                              |                                |                                | Environmental factors<br>Patients' defensive behaviors   |

**Appendix Figure 1 The modifying process of main dimensions coded by two parallel researchers**

*\*Not showing specific sub-dimensions and items in each main dimension, and some dimensions of final codes came from sub-dimensions of operational codes.*

Appendix Table 5 Dimensions and items of patient safety culture in MCH institutions

| Dimensions/items                                                                                    | Providers(n1=79)    |                       | Patients<br>(n4=39) | Total<br>(N=118) |
|-----------------------------------------------------------------------------------------------------|---------------------|-----------------------|---------------------|------------------|
|                                                                                                     | Managers<br>(n2=20) | Frontlines<br>(n3=59) |                     |                  |
| <b>1. Management support</b>                                                                        | <b>19(95.0%)</b>    | <b>53(89.8%)</b>      | <b>17(43.6%)</b>    | <b>89(75.4%)</b> |
| 1.1 Management gives priority to PS, considering other goals like profits or reputations.           | 10(50.0%)           | 14(23.7%)             | 3( 7.7%)            | 27(22.9%)        |
| 1.2 Management is committed to continuous improvement of PS.                                        | 13(65.0%)           | 27(45.8%)             | 2( 5.1%)            | 42(35.6%)        |
| 1.3 Management is committed to create a good working atmosphere.                                    | 1( 5.0%)            | 1( 1.7%)              | 0( 0.0%)            | 2( 1.7%)         |
| 1.4 Management provides adequate allocation of resources to the department where I work.            | 2(10.0%)            | 15(25.4%)             | 0( 0.0%)            | 17(14.4%)        |
| 1.5 Management thinks highly of improving organizational environments and medical facilities.       | 16(80.0%)           | 38(64.4%)             | 14(35.9%)           | 68(57.6%)        |
| 1.6 Management pays more attention to profit-making departments than others.                        | 6(30.0%)            | 11(18.6%)             | 0( 0.0%)            | 17(14.4%)        |
| <b>2.Regulation and procedure</b>                                                                   | <b>19(95.0%)</b>    | <b>54(91.5%)</b>      | <b>13(33.3%)</b>    | <b>86(72.9%)</b> |
| 2.1Innovations of regulations and procedures are rigorous and flexible.                             | 6(30.0%)            | 10(16.9%)             | 1( 2.6%)            | 17(14.4%)        |
| 2.2Motivate mechanism of the organization is fair and feasible.                                     | 9(45.0%)            | 30(50.8%)             | 0( 0.0%)            | 39(33.1%)        |
| 2.3 Some regulations and procedures are unreasonable and lead to inconveniences, barriers or risks. | 14(70.0%)           | 37(62.7%)             | 13(33.3%)           | 64(54.2%)        |
| 2.4Frontlines can obey regulations and procedures in the organization.                              | 16(80.0%)           | 26(44.1%)             | 2( 5.1%)            | 44(37.3%)        |
| 2.5Risk preventing and responding mechanism has been introduced to reduce or avoid errors.          | 6(30.0%)            | 15(25.4%)             | 0( 0.0%)            | 21(17.8%)        |
| 2.6 Frontline staff can be able to involve in decision-making.                                      | 3(15.0%)            | 10(16.9%)             | 0( 0.0%)            | 13(11.0%)        |
| <b>3.Staffing</b>                                                                                   | <b>16(80.0%)</b>    | <b>52(88.1%)</b>      | <b>16(41.0%)</b>    | <b>84(71.2%)</b> |
| 3.1I often feel busy too much.                                                                      | 3(15.0%)            | 9(15.3%)              | 4(10.3%)            | 16(13.6%)        |
| 3.2Staffing is far from sufficient to deal with workload.                                           | 13(65.0%)           | 41(69.5%)             | 11(28.2%)           | 65(55.1%)        |
| 3.3 Because of overload working, we cannot provide patients the best services as we could.          | 13(65.0%)           | 48(81.4%)             | 10(25.6%)           | 71(60.2%)        |
| <b>4.Teamwork</b>                                                                                   | <b>13(65.0%)</b>    | <b>47(79.7%)</b>      | <b>5(12.8%)</b>     | <b>65(55.1%)</b> |
| 4.1Referrals between the organization and other institutions are efficient to ensure PS.            | 5(25.0%)            | 9(15.3%)              | 3( 7.7%)            | 17(14.4%)        |
| 4.2 Cross-department teamwork in the organization is not satisfying.                                | 9(45.0%)            | 34(57.6%)             | 1( 2.6%)            | 44(37.3%)        |
| 4.3Communication is not pleasant between supervisors and subordinates.                              | 3(15.0%)            | 3( 5.1%)              | 0( 0.0%)            | 6( 5.1%)         |
| 4.4Handoffs are handled seriously and carefully.                                                    | 1( 5.0%)            | 8(13.6%)              | 0( 0.0%)            | 9( 7.6%)         |

|                                                                                                         |                  |                  |                  |                  |
|---------------------------------------------------------------------------------------------------------|------------------|------------------|------------------|------------------|
| 4.5 Teamwork is satisfying in the department where I work.                                              | 8(40.0%)         | 31(52.5%)        | 1( 2.6%)         | 40(33.9%)        |
| <b>5.Non-punitive</b>                                                                                   | <b>17(85.0%)</b> | <b>42(71.2%)</b> | <b>6(15.4%)</b>  | <b>65(55.1%)</b> |
| 5.1 Frontlines might not report adverse events happened due to worries about punishments.               | 4(20.0%)         | 4( 6.8%)         | 0( 0.0%)         | 8( 6.8%)         |
| 5.2 Frontlines are encouraged to report adverse events.                                                 | 5(25.0%)         | 17(28.8%)        | 0( 0.0%)         | 22(18.6%)        |
| 5.3 Adverse events are mostly attributed to individuals in the organization.                            | 2(10.0%)         | 2( 3.4%)         | 6(15.4%)         | 10( 8.5%)        |
| 5.4 Feedback of adverse events reported is delivered in time.                                           | 3(15.0%)         | 7(11.9%)         | 0( 0.0%)         | 10( 8.5%)        |
| 5.5 Efforts are much engaged in preventing adverse events to reoccur.                                   | 2(10.0%)         | 18(30.5%)        | 0( 0.0%)         | 20(16.9%)        |
| 5.6 In the organization, it is preferred to learn from adverse events than blame or punish individuals. | 17(85.0%)        | 41(69.5%)        | 0( 0.0%)         | 58(49.2%)        |
| <b>6.Openness to adverse events</b>                                                                     | <b>10(50.0%)</b> | <b>38(64.4%)</b> | <b>0( 0.0%)</b>  | <b>48(40.7%)</b> |
| 6.1 If adverse event happen and might harm patients, I will report it.                                  | 8(40.0%)         | 21(35.6%)        | 0( 0.0%)         | 29(24.6%)        |
| 6.2 If adverse event happen but nearly not harm patients, I will report it as well.                     | 10(50.0%)        | 22(37.3%)        | 0( 0.0%)         | 32(27.1%)        |
| 6.3 If adverse event happen to colleagues, I will report it as well.                                    | 5(25.0%)         | 20(33.9%)        | 0( 0.0%)         | 25(21.2%)        |
| 6.4 If adverse event happen, individuals involved will be regarded by colleagues not as usual.          | 1( 5.0%)         | 7(11.9%)         | 0( 0.0%)         | 8( 6.8%)         |
| 6.5 It is not superstitious to discuss adverse events among colleagues.                                 | 5(25.0%)         | 25(42.4%)        | 0( 0.0%)         | 30(25.4%)        |
| 6.6 I am not worried about discussing my errors.                                                        | 2(10.0%)         | 4( 6.8%)         | 0( 0.0%)         | 6( 5.1%)         |
| 6.7 If adverse event happen and is not found by patient, he/she will be not informed to avoid dispute.  | 3(15.0%)         | 12(20.3%)        | 0( 0.0%)         | 15(12.7%)        |
| 6.8 If adverse event happen, patient will be comforted to relieve feelings of unsafety.                 | 5(25.0%)         | 6(10.2%)         | 0( 0.0%)         | 11( 9.3%)        |
| <b>7.Risk awareness and warning</b>                                                                     | <b>15(75.0%)</b> | <b>44(74.6%)</b> | <b>13(33.3%)</b> | <b>72(61.0%)</b> |
| 7.1 Besides incidents, management pay much attention to errors or potential risks as well.              | 3(15.0%)         | 6(10.2%)         | 0( 0.0%)         | 9( 7.6%)         |
| 7.2 If potential risks emerge, efforts will be much engaged to avoid reoccurring.                       | 7(35.0%)         | 17(28.8%)        | 0( 0.0%)         | 24(20.3%)        |
| 7.3 I cannot ignore errors and potential risks in work.                                                 | 1( 5.0%)         | 5( 8.5%)         | 0( 0.0%)         | 6( 5.1%)         |
| 7.4 I agree that most of errors are preventable.                                                        | 6(30.0%)         | 16(27.1%)        | 2( 5.1%)         | 24(20.3%)        |
| 7.5 I agree that 'to err is human'.                                                                     | 6(30.0%)         | 17(28.8%)        | 6(15.4%)         | 29(24.6%)        |
| 7.6 I consider my work as part of PS.                                                                   | 11(55.0%)        | 26(44.1%)        | 2( 5.1%)         | 39(33.1%)        |
| <b>8.Continuous learning</b>                                                                            | <b>19(95.0%)</b> | <b>55(93.2%)</b> | <b>20(51.3%)</b> | <b>94(79.7%)</b> |
| 8.1 Continuous learning is considered as an important thing in the organization.                        | 15(75.0%)        | 40(67.8%)        | 4(10.3%)         | 59(50.0%)        |

1  
2  
3  
4  
5  
6  
7  
8  
9  
10  
11  
12  
13  
14  
15  
16  
17  
18  
19  
20  
21  
22  
23  
24  
25  
26  
27  
28  
29  
30  
31  
32  
33  
34  
35  
36  
37  
38  
39  
40  
41  
42  
43  
44  
45  
46  
47

|            |                                                                                                      |                   |                  |                  |                   |
|------------|------------------------------------------------------------------------------------------------------|-------------------|------------------|------------------|-------------------|
| 8.2        | Colleagues always discuss how to improve work.                                                       | 7(35.0%)          | 30(50.8%)        | 0( 0.0%)         | 37(31.4%)         |
| 8.3        | I am competent to handle my job.                                                                     | 16(80.0%)         | 39(66.1%)        | 19(48.7%)        | 74(62.7%)         |
| 8.4        | I need to learn continuously.                                                                        | 12(60.0%)         | 35(59.3%)        | 2( 5.1%)         | 49(41.5%)         |
| 8.5        | New employees are trained enough to be acquainted with regulations and procedures.                   | 7(35.0%)          | 17(28.8%)        | 0( 0.0%)         | 24(20.3%)         |
| 8.6        | Staff is trained enough (not limited to knowledge and skills).                                       | 10(50.0%)         | 40(67.8%)        | 1( 2.6%)         | 51(43.2%)         |
| <b>9.</b>  | <b>Working perception</b>                                                                            | <b>20(100.0%)</b> | <b>54(91.5%)</b> | <b>37(94.9%)</b> | <b>111(94.1%)</b> |
| 9.1        | I have a sense of satisfaction and accomplishment in my work.                                        | 9(45.0%)          | 21(35.6%)        | 0( 0.0%)         | 30(25.4%)         |
| 9.2        | I feel tired of my work.                                                                             | 13(65.0%)         | 22(37.3%)        | 2( 5.1%)         | 37(31.4%)         |
| 9.3        | I can receive patients with compassion and empathy.                                                  | 13(65.0%)         | 30(50.8%)        | 14(35.9%)        | 57(48.3%)         |
| 9.4        | I can perform patience and kind attitudes in my work.                                                | 14(70.0%)         | 41(69.5%)        | 37(94.9%)        | 92(78.0%)         |
| 9.5        | I work seriously and responsibly.                                                                    | 12(60.0%)         | 36(61.0%)        | 13(33.3%)        | 61(51.7%)         |
| <b>10.</b> | <b>Providers' defensive behaviors</b>                                                                | <b>9(45.0%)</b>   | <b>22(37.3%)</b> | <b>9(23.1%)</b>  | <b>40(33.9%)</b>  |
| 10.1       | To avoid high risk, we might refuse patients who we are able to treat in fact.                       | 2(10.0%)          | 9(15.3%)         | 0( 0.0%)         | 11( 9.3%)         |
| 10.2       | To avoid dispute, I might yield to patient, rather than adhere to rules and guidelines.              | 5(25.0%)          | 15(25.4%)        | 2( 5.1%)         | 22(18.6%)         |
| 10.3       | To avoid dispute, we have to do massive informed consents in writing or orally to protect ourselves. | 4(20.0%)          | 7(11.9%)         | 3( 7.7%)         | 14(11.9%)         |
| 10.4       | Unnecessary interventions exist in the organization.                                                 | 3(15.0%)          | 2( 3.4%)         | 5(12.8%)         | 10( 8.5%)         |
| <b>11.</b> | <b>Patient involvement</b>                                                                           | <b>15(75.0%)</b>  | <b>44(74.6%)</b> | <b>34(87.2%)</b> | <b>93(78.8%)</b>  |
| 11.1       | Inform patients (like alternative plans and risks) as enough as I can.                               | 13(65.0%)         | 42(71.2%)        | 34(87.2%)        | 89(75.4%)         |
| 11.2       | Response to any question of patients.                                                                | 0( 0.0%)          | 9(15.3%)         | 13(33.3%)        | 22(18.6%)         |
| 11.3       | We often take advice from patients.                                                                  | 7(35.0%)          | 13(22.0%)        | 12(30.8%)        | 32(27.1%)         |
| 11.4       | We emphasize health education to patients.                                                           | 5(25.0%)          | 19(32.2%)        | 7(17.9%)         | 31(26.3%)         |
| 11.5       | I respect patient's willing and rights.                                                              | 4(20.0%)          | 21(35.6%)        | 7(17.9%)         | 32(27.1%)         |
| 11.6       | Patients are encouraged to participate in risk management in the organization.                       | 4(20.0%)          | 13(22.0%)        | 9(23.1%)         | 26(22.0%)         |
| <b>12.</b> | <b>MCH specific</b>                                                                                  | <b>6(30.0%)</b>   | <b>6(10.2%)</b>  | <b>0( 0.0%)</b>  | <b>12(10.2%)</b>  |
| 12.1       | Management doesn't support to complete all of public health tasks.                                   | 8(40.0%)          | 14(23.7%)        | 0( 0.0%)         | 22(18.6%)         |
| 12.2       | Staffing allocated on public health is insufficient.                                                 | 4(20.0%)          | 7(11.9%)         | 0( 0.0%)         | 11( 9.3%)         |



1  
2  
3  
4  
5  
6  
7  
8  
9  
10  
11  
12  
13  
14  
15  
16  
17  
18  
19  
20  
21  
22  
23  
24  
25  
26  
27  
28  
29  
30  
31  
32  
33  
34  
35  
36  
37  
38  
39  
40  
41  
42  
43  
44  
45  
46  
47

|                                                                                                     |          |           |          |           |
|-----------------------------------------------------------------------------------------------------|----------|-----------|----------|-----------|
| 12.3 Staffing allocation make priority to clinic departments rather than public health departments. | 1( 5.0%) | 1( 1.7%)  | 0( 0.0%) | 2( 1.7%)  |
| 12.4 Our cooperation with other MCH institutions is satisfying.                                     | 4(20.0%) | 13(22.0%) | 1( 2.6%) | 18(15.3%) |
| 12.5 I agree that public health is very important and necessary part of a MCH institution.          | 6(30.0%) | 4( 6.8%)  | 0( 0.0%) | 10( 8.5%) |
| 12.6 I agree that public health should be given more attentions than is now.                        | 3(15.0%) | 1( 1.7%)  | 0( 0.0%) | 4( 3.4%)  |
| 12.7 Public health workers are neglected frequently.                                                | 0( 0.0%) | 1( 1.7%)  | 0( 0.0%) | 1( 0.8%)  |
| 12.8 Public health departments are prejudiced as 'special' in the organization.                     | 0( 0.0%) | 3( 5.1%)  | 0( 0.0%) | 3( 2.5%)  |

## Standards for Reporting Qualitative Research (SRQR)

| No.                       | Topic                                        | Item                                                                                                                                                                                                                                                                                                                                             | Checked                             |
|---------------------------|----------------------------------------------|--------------------------------------------------------------------------------------------------------------------------------------------------------------------------------------------------------------------------------------------------------------------------------------------------------------------------------------------------|-------------------------------------|
| <b>Title and abstract</b> |                                              |                                                                                                                                                                                                                                                                                                                                                  |                                     |
| S1                        | Title                                        | Concise description of the nature and topic of the study Identifying the study as qualitative or indicating the approach (e.g., ethnography, grounded theory) or data collection methods (e.g., interview, focus group) is recommended                                                                                                           | <input checked="" type="checkbox"/> |
| S2                        | Abstract                                     | Summary of key elements of the study using the abstract format of the intended publication; typically includes background, purpose, methods, results, and conclusions                                                                                                                                                                            | <input checked="" type="checkbox"/> |
| <b>Introduction</b>       |                                              |                                                                                                                                                                                                                                                                                                                                                  |                                     |
| S3                        | Problem formulation                          | Description and significance of the problem/phenomenon studied; review of relevant theory and empirical work; problem statement                                                                                                                                                                                                                  | <input checked="" type="checkbox"/> |
| S4                        | Purpose or research question                 | Purpose of the study and specific objectives or questions                                                                                                                                                                                                                                                                                        | <input checked="" type="checkbox"/> |
| <b>Methods</b>            |                                              |                                                                                                                                                                                                                                                                                                                                                  |                                     |
| S5                        | Qualitative approach and research paradigm   | Qualitative approach (e.g., ethnography, grounded theory, case study, phenomenology, narrative research) and guiding theory if appropriate; identifying the research paradigm (e.g., postpositivist, constructivist/interpretivist) is also recommended; rationale                                                                               | <input checked="" type="checkbox"/> |
| S6                        | Researcher characteristics and reflexivity   | Researchers' characteristics that may influence the research, including personal attributes, qualifications/experience, relationship with participants, assumptions, and/or presuppositions; potential or actual interaction between researchers' characteristics and the research questions, approach, methods, results, and/or transferability | <input checked="" type="checkbox"/> |
| S7                        | Context                                      | Setting/site and salient contextual factors; rationale                                                                                                                                                                                                                                                                                           | <input checked="" type="checkbox"/> |
| S8                        | Sampling strategy                            | How and why research participants, documents, or events were selected; criteria for deciding when no further sampling was necessary (e.g., sampling saturation); rationale                                                                                                                                                                       | <input checked="" type="checkbox"/> |
| S9                        | Ethical issues pertaining to human subjects  | Documentation of approval by an appropriate ethics review board and participant consent, or explanation for lack thereof; other confidentiality and data security issues                                                                                                                                                                         | <input checked="" type="checkbox"/> |
| S10                       | Data collection methods                      | Types of data collected; details of data collection procedures including (as appropriate) start and stop dates of data collection and analysis, iterative process, triangulation of sources/methods, and modification of procedures in response to evolving study findings; rationale                                                            | <input checked="" type="checkbox"/> |
| S11                       | Data collection instruments and technologies | Description of instruments (e.g., interview guides, questionnaires) and devices (e.g., audio recorders) used for data collection; if/how the instrument(s) changed over the course of the study                                                                                                                                                  | <input checked="" type="checkbox"/> |
| S12                       | Units of study                               | Number and relevant characteristics of participants, documents, or                                                                                                                                                                                                                                                                               | <input checked="" type="checkbox"/> |

|                         |                                                                                              |                                                                                                                                                                                                                                                                                                       |                                     |
|-------------------------|----------------------------------------------------------------------------------------------|-------------------------------------------------------------------------------------------------------------------------------------------------------------------------------------------------------------------------------------------------------------------------------------------------------|-------------------------------------|
|                         |                                                                                              | events included in the study; level of participation (could be reported in results)                                                                                                                                                                                                                   |                                     |
| S13                     | Data processing                                                                              | Methods for processing data prior to and during analysis, including transcription, data entry, data management and security, verification of data integrity, data coding, and anonymization/deidentification of excerpts                                                                              | <input checked="" type="checkbox"/> |
| S14                     | Data analysis                                                                                | Process by which inferences, themes, etc., were identified and developed, including the researchers involved in data analysis; usually references a specific paradigm or approach; rationale                                                                                                          | <input checked="" type="checkbox"/> |
| S15                     | Techniques to enhance trustworthiness                                                        | Techniques to enhance trustworthiness and credibility of data analysis (e.g., member checking, audit trail, triangulation); rationale                                                                                                                                                                 | <input checked="" type="checkbox"/> |
| <b>Results/findings</b> |                                                                                              |                                                                                                                                                                                                                                                                                                       |                                     |
| S16                     | Synthesis and interpretation                                                                 | Main findings (e.g., interpretations, inferences, and themes); might include development of a theory or model, or integration with prior research or theory                                                                                                                                           | <input checked="" type="checkbox"/> |
| S17                     | Links to empirical data                                                                      | Evidence (e.g., quotes, field notes, text excerpts, photographs) to substantiate analytic findings                                                                                                                                                                                                    | <input checked="" type="checkbox"/> |
| <b>Discussion</b>       |                                                                                              |                                                                                                                                                                                                                                                                                                       |                                     |
| S18                     | Integration with prior work, implications, transferability, and contribution(s) to the field | Short summary of main findings; explanation of how findings and conclusions connect to, support, elaborate on, or challenge conclusions of earlier scholarship; discussion of scope of application/generalizability; identification of unique contribution(s) to scholarship in a discipline or field | <input checked="" type="checkbox"/> |
| S19                     | Limitations                                                                                  | Trustworthiness and limitations of findings                                                                                                                                                                                                                                                           | <input checked="" type="checkbox"/> |
| <b>Other</b>            |                                                                                              |                                                                                                                                                                                                                                                                                                       |                                     |
| S20                     | Conflicts of interest                                                                        | Potential sources of influence or perceived influence on study conduct and conclusions; how these were managed                                                                                                                                                                                        | <input checked="" type="checkbox"/> |
| S21                     | Funding                                                                                      | Sources of funding and other support; role of funders in data collection, interpretation, and reporting                                                                                                                                                                                               | <input checked="" type="checkbox"/> |

aThe authors created the SRQR by searching the literature to identify guidelines, reporting standards, and critical appraisal criteria for qualitative research; reviewing the reference lists of retrieved sources; and contacting experts to gain feedback. The SRQR aims to improve the transparency of all aspects of qualitative research by providing clear standards for reporting qualitative research.

bThe rationale should briefly discuss the justification for choosing that theory, approach, method, or technique rather than other options available, the assumptions and limitations implicit in those choices, and how those choices influence study conclusions and transferability. As appropriate, the rationale for several items might be discussed together.

# BMJ Open

## Measuring patient safety culture in maternal and child health institutions in China: a qualitative study

|                                 |                                                                                                                                                                                                                                                                                                                                                                                                             |
|---------------------------------|-------------------------------------------------------------------------------------------------------------------------------------------------------------------------------------------------------------------------------------------------------------------------------------------------------------------------------------------------------------------------------------------------------------|
| Journal:                        | <i>BMJ Open</i>                                                                                                                                                                                                                                                                                                                                                                                             |
| Manuscript ID                   | bmjopen-2016-015458.R1                                                                                                                                                                                                                                                                                                                                                                                      |
| Article Type:                   | Research                                                                                                                                                                                                                                                                                                                                                                                                    |
| Date Submitted by the Author:   | 25-Apr-2017                                                                                                                                                                                                                                                                                                                                                                                                 |
| Complete List of Authors:       | Wang, Yuanyuan; Peking University, School of Public Health; Peking University Third Hospital, Second Outpatient Department<br>Wang, Yan; Peking University, School of Public Health<br>Liu, Chaojie; La Trobe University, School of Psychology and Public Health<br>Liu, Weiwei; Peking University Third Hospital, Second Outpatient Department<br>Shi, Huifeng; Peking University, School of Public Health |
| <b>Primary Subject Heading</b>: | Health services research                                                                                                                                                                                                                                                                                                                                                                                    |
| Secondary Subject Heading:      | Qualitative research                                                                                                                                                                                                                                                                                                                                                                                        |
| Keywords:                       | Health & safety < HEALTH SERVICES ADMINISTRATION & MANAGEMENT, Organisation of health services < HEALTH SERVICES ADMINISTRATION & MANAGEMENT, QUALITATIVE RESEARCH                                                                                                                                                                                                                                          |
|                                 |                                                                                                                                                                                                                                                                                                                                                                                                             |

SCHOLARONE™  
Manuscripts

1  
2  
3 **Measuring patient safety culture in maternal and child health institutions in China: a qualitative**  
4 **study**  
5  
6

7 **Authors' names and affiliations:**

8 Yuanyuan Wang<sup>1 3</sup> (PhD, yyuanwang@163.com)

9 Yan Wang<sup>1</sup> (Prof. & DrPH, wangyan@bjmu.edu.cn)

10 Chaojie Liu<sup>2</sup> (Prof. & PhD, c.liu@latrobe.edu.au)

11 Weiwei Liu<sup>3</sup> (Prof. & MD, vivian\_liu@bjmu.edu.cn)

12 Huifeng Shi<sup>1</sup> (PhD, nsxm@pku.edu.cn)  
13  
14

15  
16 1. Peking University, School of Public Health, Department of Maternal and Child Health, Beijing, China

17 2. La Trobe University, School of Psychology and Public Health, Melbourne, Australia

18 3. Peking University Third Hospital, Second Outpatient Department, Beijing, China  
19

20  
21 Corresponding author:

22 Name: Yan Wang (Prof. & DrPH)

23 Address: Peking University, School of Public Health, Department of Maternal and Child Health, Beijing,  
24 100083, China

25 E-mail: wangyan@bjmu.edu.cn  
26  
27  
28  
29  
30  
31  
32  
33  
34  
35  
36  
37  
38  
39  
40  
41  
42  
43  
44  
45  
46  
47  
48  
49  
50  
51  
52  
53  
54  
55  
56  
57  
58  
59  
60

**ABSTRACT**

**Introduction** Patient safety culture (PSC) plays a critical role in ensuring safe and quality care. Extensive PSC studies have been undertaken in hospitals. However, little is known about PSC in maternal and child health (MCH) institutions in China, which provide both population-based preventive services as well as individual care for patients.

**Objectives** This study aimed to develop a theoretical framework for conceptualizing PSC in MCH institutions in China.

**Methods** The study was undertaken in six MCH institutions (three in Hebei and three in Beijing). Participants (n=118) were recruited through stratified purposive sampling: 20 managers/administrators, 59 care providers and 39 patients. In-depth interviews were conducted with the participants. The interview data were coded using both inductive (based on the existing PSC theory developed by the Agency for Healthcare Research and Quality) and deductive (open coding arising from data) approaches. A PSC framework was formulated through axial coding that connected initial codes and selective coding that extracted a small number of themes.

**Results** The interviewees considered patient safety in relation to six aspects: safety and security in public spaces, safety of medical services, privacy and information security, financial security, psychological safety, and gap in services. A 12-dimensional PSC framework was developed, containing 69 items. While the existing PSC theory was confirmed by this study, some new themes emerged from the data. Patients expressed particular concerns about psychological safety and financial security. Defensive medical practices emerged as a PSC dimension that is associated with not only medical safety but also financial security and psychological safety. Patient engagement was also valued by the interviewees, especially the patients, as part of PSC.

**Conclusions** Although there are some common features in PSC across different healthcare delivery systems, PSC can also be context specific. In MCH settings in China, the meaning of “patient safety” goes beyond the traditional definition of patients. General wellbeing, health and disease prevention are important anchor points for defining PSC in such settings.

**Strengths and limitations of this study**

- The study explored the concept of patient safety and PSC from the points of view of managers/administrators, care providers and patients.
- The study was conducted in MCH institutions, which provided population-based preventive services as well as individual care for patients.
- The results are context specific and caution should be taken when generalizing the results.
- The study provides a high level classification of patient safety, which should not be treated as an operational taxonomy to be used directly in practices.

**INTRODUCTION**

Patient safety has become a global concern over the last two decades. It is agreed that patient safety culture (PSC), which is defined as the ‘shared values, beliefs, norms and procedures related to patient safety among members of the organization’,<sup>1</sup> is fundamental for safe and quality care.<sup>2-6</sup> In the literature, there are several distinct but related terms describing PSC, such as patient safety climate and patient safety attitudes. Culture is something that can be passed on and is relatively enduring.<sup>7</sup> It is reflected in normalized behaviors and practices. Climate, on the other hand, provides a snapshot of the overwhelming perceptions of people in regard to PSC.<sup>8,9</sup> Attitudes refer to how people see and

1  
2  
3 respond to matters associated with patient safety.<sup>10</sup> All of the three concepts are associated with safe  
4 behaviors, processes and outcomes.<sup>5 11-13</sup>

5  
6 Maternal and child health (MCH) is a priority on the global development agenda, such as the  
7 sustainable development goals (SDGs) promoted by the United Nations.<sup>14</sup> China has achieved  
8 extraordinary success in MCH over the past few decades, thanks to the universal coverage of MCH  
9 care delivered by MCH institutions.<sup>15 16</sup> From 1990 to 2015, the maternal mortality ratio (MMR,  
10 maternal deaths per 100 000 live births) in China decreased from 114.2 to 17.7;<sup>17</sup> and under-five  
11 mortality rate (U5MR, deaths per 1000 live births) dropped from 55.9 to 12.3.<sup>18</sup> There are 3,071 MCH  
12 institutions in China, covering all counties and cities.<sup>19</sup> They are dedicated to providing four categories  
13 of MCH services: (1) maternal and obstetrical care such as premarital examinations, progestational  
14 consultations, and pregnancy, labor and postpartum services; (2) pediatric care including management  
15 of neonatal, infant and child growth and development, nutrition, mental health, as well as the  
16 diagnosis and treatment of childhood diseases; (3) women's health, ranging from adolescent health  
17 and reproduction to nutrition, mental health, breast care, menopause and aged care. Gynecological  
18 services are also provided; (4) family planning services, such as health education, preconception  
19 counseling, contraception, and reproductive healthcare services. The MCH institutions operate at  
20 provincial, municipal and county levels, forming a tiered comprehensive network.<sup>20</sup> A considerable  
21 number of policies and regulations have been devoted to strengthening the infrastructure,  
22 technologies, and procedures of MCH services.<sup>15 16 21</sup> However, scant attention has been paid to PSC in  
23 MCH institutions.

24  
25 Measuring PSC is important to help health workers to increase awareness and develop a better  
26 understanding of patient safety. It can also provide information support to managers to improve their  
27 managerial practices. Several PSC measurement tools have been developed. Of those tools, the  
28 Hospital Survey on Patient Safety Culture (HSPSC) developed by the Agency for Healthcare Research  
29 and Quality,<sup>22</sup> the Patient Safety Climate in Healthcare Organizations (PSCHO)<sup>23</sup> and the Safety  
30 Attitudes Questionnaire (SAQ)<sup>10</sup> are most commonly used. They have been applied to a wide range of  
31 health institutions in various countries,<sup>24-26</sup> including in China.<sup>27-31</sup> However, the Chinese versions of  
32 these instruments followed a stringent translation protocol and considered little, if any, of the special  
33 contexts of Chinese health institutions.

34  
35 This study aimed to explore the concept of patient safety and PSC in China's MCH institutions. Since  
36 culture has the nature of profundity and abstruseness,<sup>32</sup> it is essential to unveil its presentations and  
37 implications under specific contexts. The principles of qualitative research, in particular the grounded  
38 theory, fits well with the objectives of this study. It allows us to generate a new (or modified) PSC  
39 framework without necessarily being restricted to any existing theoretical framework.<sup>33 34</sup>

## 46 47 **METHODS**

### 48 **Design**

49 This is a qualitative study conducted by a multidisciplinary research team, comprising experts in MCH  
50 (YYW [female], YW [female] and HS [male]), research methodology (CL [male]), and health services  
51 management (CL [male] & WL [female]). In-depth interviews were undertaken with health workers  
52 (managers/administrators and care providers) and patients to examine their perceptions and  
53 experiences of patient safety and PSC.

### 57 **Setting and sample**

1  
2  
3 Data were collected between November 2014 and April 2015 in six MCH institutions: three in Hebei  
4 and three in Beijing. These institutions were purposively selected, considering diversities in staffing,  
5 resources (e.g. beds), and scope and volume of services (e.g. outpatient, inpatient and birth delivery).  
6 The number of beds in the participating MCH institutions ranged from 40 (at the county level) to 460  
7 (a large metropolitan center). Further details of the participating MCH institutions can be found in  
8 Appendix Table 1.  
9

10 A stratified purposive sampling strategy was adopted to recruit participants. In each MCH institution,  
11 the potential participants were divided into 4-5 groups: management/administration (e.g., general  
12 office, medical administration, nursing administration, infection control), MCH clinics (e.g., pediatrics,  
13 gynecology, obstetrics), population health services (e.g., child healthcare, women's healthcare,  
14 preventive care), allied health services (e.g., pharmacy, imaging, laboratory) and other clinical services  
15 (e.g., internal medicine, surgery, dental, traditional Chinese medicine). In each institution, between  
16 2-5 managers/administrators, 7-12 care providers (including doctors, nurses, public health workers,  
17 midwives, and allied health professionals) and 5-8 patients (including caregivers of children) were  
18 invited to participate in the study. Three invited interviewees (1 doctor and 2 patients) withdrew due  
19 to disruption caused by other urgent matters. The final sample size was determined by the saturation  
20 of information when no new theme emerged from the coding. The saturation of information was  
21 deemed to be achieved when the entire research team (especially those who performed the  
22 interviews and coding) reached consensus. This resulted in a final sample size of 118, including 20  
23 managers/administrators (16.9%), 59 care providers (50.0%) and 39 patients (33.1%). The  
24 characteristics of participants are presented in Appendix Tables 2 and 3.  
25  
26  
27  
28  
29

### 30 **Data collection, processing and analyses**

31 This study used both inductive and deductive approaches in data collection, coding and analyses. The  
32 interview guides were developed based on a pre-tested tool in a previous study.<sup>35</sup> However, the  
33 interviewers were trained to respond to the interviewees in a flexible way in order to obtain in-depth  
34 information. They were encouraged to ask questions that were not listed in the interview guides. At  
35 the end of each interview session, the interviewers reviewed the interview guides to ensure that the  
36 interview had covered all the questions listed in the guides. No repeated interviews were undertaken.  
37 All interviews were conducted face-to-face in the MCH institutions, led by two chief investigators  
38 (YYW [female] and HS [male]) and assisted by three trained interviewers (with a master or PhD  
39 degree). Prior to each interview session, the interviewers introduced themselves and the purpose,  
40 contents, ethical principles and declarations of the study and obtained written informed consent from  
41 the participants. Each interview lasted 15-50 minutes and was audio-recorded. The interviewers also  
42 took notes on the environment of the interview, the body language of respondents, self-reflection,  
43 and any other information they thought necessary.  
44

45 Data analyses took place concurrently with data collection. Interview strategies (including the  
46 questions asked) were adjusted in subsequent interviews. The research team met regularly, discussing  
47 the findings and determining whether additional samples were needed.  
48

49 All audio records were transcribed verbatim. We used NVivo 8.0 software to perform coding and  
50 analyses on the transcribed data and interview notes. The coding procedure followed the principles of  
51 grounded theory.<sup>33</sup> We started with open coding, which generated numerous codes from the raw data  
52 reflecting the panorama of the data. Original words were extracted to label the codes whenever it was  
53 possible. The second step involved axial coding. The initial codes were compared and condensed, with  
54  
55  
56  
57  
58  
59  
60



1  
2  
3 similar codes being merged using a new label that could describe all of the merged initial codes. The  
4 connections between different codes were identified by referring back to the raw data. This reduced  
5 the number of codes significantly. The third step was selective coding, which further abstracted key  
6 themes from the scattered codes. The selective coding considered the fitness of the condensed codes  
7 into the existing PSC theoretical framework developed by the Agency for Healthcare Research and  
8 Quality. Additional themes were established for those codes that did not fit well into the existing  
9 framework. Finally, we translated the codes into “dimensions” (high level framework) and “items”  
10 embedded in each dimension (Appendix Table 5).  
11  
12

### 13 14 **Reliability and validity of coding**

15 All data were coded in parallel by two researchers (YYW [female] and HS [male]). This ensured the  
16 validity of coding.<sup>36 37</sup> First, both researchers developed their own initial codes from the data. They  
17 then shared and discussed their coding and agreed on an operational list of codes. The agreed  
18 operational list of codes was eventually used for coding all of the data by the two researchers  
19 independently. Finally, another round of coding discussion was held, with modifications being made to  
20 the operational codes and the coding of all of the data into the final list of codes. The coding process is  
21 illustrated in Appendix Figure 1.  
22

23 The reliability of coding was tested through repeated coding.<sup>38 39</sup> About 10% (n=12) of interview  
24 records were randomly selected for repeated coding: 2 from managers/administrators, 6 from care  
25 providers, and 4 from patients. Two researchers recoded the data independently into the agreed  
26 operational list of codes. About 63.3% to 100% of the codes were consistent between the two  
27 researchers. The two researchers then discussed and reached a consensus on the final coding, which  
28 was compared with the coding done in the full data analyses. The percentage of agreement (=number  
29 of codes agreed upon / total number of codes \* 100% for each interview record) in repeated coding  
30 ranged from 62.2% to 82.5% (Appendix Table 4).  
31

32 We did not seek feedback from the interviewees on the transcripts and coding due to a lack of contact  
33 details.  
34  
35  
36

## 37 38 **RESULTS**

### 39 **What is patient safety?**

40 In the MCH setting, the concept of patient safety was linked to unwanted health outcomes, not  
41 necessarily adverse events as a result of medical interventions. The interviewees were concerned  
42 about both adverse events and the shortage of good outcomes.  
43

44 Patient safety was categorized into six aspects (Table 1): safety and security of public spaces (e.g., falls,  
45 fire, property loss and damage), safety of medical services (through the entire process), privacy and  
46 information security, financial security, psychological safety, and gap in services. Managers and care  
47 providers were more likely to highlight the safety of medical services (65.0% and 52.5%, respectively)  
48 and the safety and security of public spaces (55.0% and 35.6%, respectively) as a major concern in  
49 patient safety. By contrast, patients (53.8%) wanted more on assurance of safety or avoided events  
50 (psychological safety). They (38.5%) also believed that unnecessary interventions could lower their  
51 financial security, jeopardizing their ability to pay for necessary interventions. While excessive  
52 interventions might be associated with adverse events, a lack of necessary interventions might be  
53 associated with negative consequences that could otherwise be avoided. Concerns about privacy and  
54 information security were shared by both health workers and patients, albeit a small percentage (25.0%  
55  
56  
57  
58  
59  
60

1  
2  
3 by managers/administrators, 5.1% by care providers and 2.6% by patients).

4 *'Illness is a painful and stressful experience... I hope doctors or nurses alleviate my anxieties*  
5 *and doubts with their professional answers and psychological support.'*(Patient)

6  
7 *'I often encounter patients suffering from postnatal depression, with all kinds of worries and*  
8 *fears... It may be more effective to comfort them psychologically, even offering a hug or*  
9 *slightly tough love, to make patients feel better rather than to prescribe drugs.'*(Provider)

10  
11 *'Some doctors like to prescribe lots of pills, infusions and examinations, whether or not they*  
12 *should, just to make a profit.'* (Patient)

13 *'Take this laboratory report (in his hand) as an example. I would not feel safe if I did not*  
14 *listen to the doctor's advice to take such a test. My doctors read it and then told me, 'it is*  
15 *okay, and there is nothing to be worried about'. I felt safe at once, no matter whether it was*  
16 *necessary to do it or how much money I paid.'* (Patient)

17  
18  
19  
20  
21  
22  
23  
24  
25  
26  
27  
28  
29  
30  
31  
32  
33  
34  
35  
36  
37  
38  
39  
40  
41  
42  
43  
44  
45  
46  
47  
48  
49  
50  
51  
52  
53  
54  
55  
56  
57  
58  
59  
60

Table 1 Number (percentage) of codes associated with patient safety in MCH institutions

| Code                                   | Descriptions                                                                                          | Health workers(n1=79) |                           | Patients<br>(n4=39) | Total<br>(N=118) |
|----------------------------------------|-------------------------------------------------------------------------------------------------------|-----------------------|---------------------------|---------------------|------------------|
|                                        |                                                                                                       | Managers<br>(n2=20)   | Care providers<br>(n3=59) |                     |                  |
| 1.Safety and security of public spaces | Incidents that happen in public spaces, e.g., falls, fires, property loss and damage                  | 11(55.0%)             | 21(35.6%)                 | 5(12.8%)            | 37(31.4%)        |
| 2. Safety of medical services          | Errors in diagnostic and treatment procedures; unintended outcomes                                    | 13(65.0%)             | 31(52.5%)                 | 9(23.1%)            | 53(44.9%)        |
| 3. Privacy and information security    | Violation of privacy and disclosure of information                                                    | 5(25.0%)              | 3( 5.1%)                  | 1( 2.6%)            | 9( 7.6%)         |
| 4. Financial security                  | Financial waste in unnecessary interventions and a lack of ability to pay for necessary interventions | 6(30.0%)              | 6(10.2%)                  | 15(38.5%)           | 27(22.9%)        |
| 5. Psychological safety                | Worry or anxiety associated with unknown events                                                       | 5(25.0%)              | 10(16.9%)                 | 21(53.8%)           | 36(30.5%)        |
| 6. Gap in services                     | Gap between expectations and reality                                                                  | 6(30.0%)              | 12(20.3%)                 | 6(15.4%)            | 24(20.3%)        |

### Patient safety culture (PSC)

Corresponding to the conceptualization of patient safety, 12 dimensions (containing 69 items) emerged as key components of PSC: management support (6 items), regulations and procedures (6 items), staffing (3 items), teamwork (5 items), non-punitive response to adverse events (6 items), openness in communication (8 items), risk awareness (6 items), continuous learning (6 items), self-efficacy (5 items), defensive medical practices (4 items), patient engagement (6 items), and competing interest between public health and clinical services(8 items).Details on the PSC dimensions and items can be found in Appendix Table 5.

Different views were found between health workers and patients. The top 5 most frequently coded dimensions from the data were: self-efficacy (100.0%), management support (95.0%), regulations and procedures (95.0%), continuous learning (95.0%) and non-punitive response to adverse events (85.0%) for managers; continuous learning (93.2%), self-efficacy (91.5%), regulations and procedures (91.5%), management support (89.8%), and staffing (88.1%) for care providers; and self-efficacy (94.9%), patient engagement (87.2%), continuous learning (51.3%), management support (43.6%), and staffing (41.0%) for patients. It was common to blame individuals for medical errors across all three groups of interviewees.

*'We have summarized the common causes of medical incidents, including poor communication, lack of knowledge and skills, not obeying guidelines and procedures, and so on. All of these causes are individual responsibilities. Punishment of departments or individuals, although sometimes attracts complains, is helpful for reducing the number of incidents and making rules and regulations work.'* (Manager)

*'A person who makes mistakes often is incompetent and should be fired.'* (Manager)

*'Punishment of individuals is fair to others who do not make mistakes.'* (Provider)

*'Medical errors and incidents are associated with personal attitudes and skills.'* (Patient)

The 12-dimensional framework for PSC confirmed the existing theoretical framework developed by the Agency for Healthcare Research and Quality. However, some new themes emerged.

Patients demanded more involvement in decision making, whether it was in relation to planning and prevention or medical procedures. They advocated for patient rights. This component of PSC was supposed to address the "gap between expectations and reality". It also reflected the nature of MCH, a kind of service comprising both preventive and clinical care.

*'Now young parents are well educated and usually learn relevant information on the Internet before seeking care for their babies; they would like more detailed and accurate explanations than before.'*(Provider)

*'Communication is very important. No matter what the conditions or risks, patients must be completely informed.'*(Patient)

Defensive medical practices emerged as another important component of PSC. Defensive practices could be presented in multiple ways, for example: rejection of a patient with high risks (risk aversion); compromised clinical decision in response to irrational requests from patients; unnecessary interventions to show "obligations" that could favor health workers in disputes. Such practices eroded the trust between health providers and patients and would eventually bring harm to patients.

*'If a pregnant woman refuses to take a prenatal blood test, we suggest that our doctors write it down in her medical records, which would provide evidence in a dispute over a case*

1  
2  
3 *of anemia.' (Manager)*

4 *'I refer premature infants to higher level hospitals as much as possible to prevent*  
5 *unexpected complications I cannot afford.'(Provider)*

6  
7 *'Doctors rely on machines too much because they don't want to take any risks.'(Patient)*  
8

9  
10 There was competing interest between public health and clinical services in MCH institutions. Some  
11 health workers believed that managers might make clinical services a priority in the institution due to  
12 financial pressures. This was likely to divert much needed resources from public health services to  
13 clinical care, increasing the possibility of the occurrence of avoidable events.  
14  
15  
16  
17  
18  
19  
20  
21  
22  
23  
24  
25  
26  
27  
28  
29  
30  
31  
32  
33  
34  
35  
36  
37  
38  
39  
40  
41  
42  
43  
44  
45  
46  
47  
48  
49  
50  
51  
52  
53  
54  
55  
56  
57  
58  
59  
60

Table 2 Number (percentage) of codes associated with the 12 dimensions of patient safety culture in MCH institutions

| Dimension                                                          | Description of dimension                                                                    | Health workers (n1=79) |                        | Patients (n4=39) | Total (N=118) |
|--------------------------------------------------------------------|---------------------------------------------------------------------------------------------|------------------------|------------------------|------------------|---------------|
|                                                                    |                                                                                             | Managers (n2=20)       | Care providers (n3=59) |                  |               |
| 1. Management support                                              | Prioritize patient safety; good management practices                                        | 19(95.0%)              | 53(89.8%)              | 17(43.6%)        | 89(75.4%)     |
| 2.Regulations and procedures                                       | Rational and adjustable regulations and policies, empowering health workers                 | 19(95.0%)              | 54(91.5%)              | 13(33.3%)        | 86(72.9%)     |
| 3.Staffing                                                         | Staffing and workloads                                                                      | 16(80.0%)              | 52(88.1%)              | 16(41.0%)        | 84(71.2%)     |
| 4.Teamwork                                                         | Teamwork within departments, across departments and across institutions                     | 13(65.0%)              | 47(79.7%)              | 5(12.8%)         | 65(55.1%)     |
| 5.Non-punitive response to adverse events                          | Non-punitive response to adverse events based on root cause analyses; feedback and learning | 17(85.0%)              | 42(71.2%)              | 6(15.4%)         | 65(55.1%)     |
| 6.Openness in communication                                        | Adverse event reporting; open communication with colleagues and patients                    | 10(50.0%)              | 38(64.4%)              | 0( 0.0%)         | 48(40.7%)     |
| 7.Risk awareness                                                   | Attitudes toward and awareness of medical risks, errors and potential flaws                 | 15(75.0%)              | 44(74.6%)              | 13(33.3%)        | 72(61.0%)     |
| 8.Continuous learning                                              | Continuous learning and training, not limited to knowledge and skills                       | 19(95.0%)              | 55(93.2%)              | 20(51.3%)        | 94(79.7%)     |
| 9. Self-efficacy                                                   | Individual belief in one's ability to succeed in tasks                                      | 20(100.0%)             | 54(91.5%)              | 37(94.9%)        | 111(94.1%)    |
| 10.Defensive medical practices                                     | Procedures serving for the purpose of self-defense in disputes                              | 9(45.0%)               | 22(37.3%)              | 9(23.1%)         | 40(33.9%)     |
| 11.Patient engagement                                              | Patient involvements in decision making                                                     | 15(75.0%)              | 44(74.6%)              | 34(87.2%)        | 93(78.8%)     |
| 12. Competing interest between public health and clinical services | Priority setting and resource allocation between public health and clinical services        | 6(30.0%)               | 6(10.2%)               | 0( 0.0%)         | 12(10.2%)     |

### External factors associated with PSC

PSC can be shaped by some external factors. In this study, the interviewees identified policy and social environments, poor health literacy of consumers, and a lack of trust between patients and health workers as major factors influencing PSC in MCH institutions.

MHC institutions are subject to strict policy and regulatory rules. Some unintended consequences had arisen from this strong control. For example, staffing and personnel policies led to a shortage of staff and heavy workloads of health workers; insufficient government financial support limited the further development of MCH institutions, resulting in the profit-seeking behaviors of these institutions; MCH institutions at the county level had restricted access to a limited range of medicines. These policy arrangements had the potential to jeopardize patient safety and PSC.

*'For social stability purposes, hospitals are always compelled to compensate medical dispute profiteers, regardless of who is wrong.'* (Manager)

*'The government usually emphasizes the importance of public health in words but not in actions. Because of a lack of funds, public health tasks are always done as little as possible in fact.'* (Manager)

*'Since the institutional reforms in our region, county-level MCH institutions are not allowed to supply some drugs and services anymore, which is a broad-brush approach that does not consider specific circumstances.'* (Provider)

The public media played a significant role in shaping the opinions of consumers. The large amount of unverified or exaggerated reports about medical incidents were blamed by the interviewees for causing distrust and conflicts between patients and health providers, fueling the defensive practices of health workers.

*'Our medical staff is overloaded and the medical industry is at high risk. However, patients cannot understand these things, and medical accidents are reported by the mass media in a way that is always misleading and misinterpreted.'* (Manager)

*'Medical disputes probably happen in all hospitals. Doubts about the whole industry have spread into society. Additionally, a small thing can be magnified by the media and aggravate distrust.'* (Provider)

Health care is a co-production process in which patients play a critical role. Poor health literacy limited the ability of patients to engage in patient safety management. The interviewees reported that some patients felt ashamed of their illness (especially female patients), some treated health care as a simple financial transaction of services, some doubted the intention of medical decisions, some held unreasonable expectations of medicines and had a low appreciation of preventive care, some simply disengaged, some misunderstood medical advice and failed to cooperate with health workers. There was a low level of recognition of the inherent inevitability of making mistakes by human beings.

*'People don't respect us. For example, some nurses have been physically attacked by parents for failing to insert the scalp needle on the first try.'* (Manager)

*'Some patients consider treating human bodies to be like repairing machines. You must ensure that they get better or they will make trouble for you.'* (Provider)

*'I couldn't understand the doctors perfectly, and I had to do what they told me.'* (Patient)

The lack of trust led patients to believe that they had to choose health workers in order to ensure

1  
2  
3 safety. Accreditation, environments and the popularity of health facilities, and the professional title  
4 and qualifications of health workers could all serve for the purpose of provider selection. This  
5 information either came from their previous experiences or from sharing with others. Unfortunately,  
6 patients with a low income had to take into consideration the costs, compromising their choice of  
7 providers. The medical-seeking behaviors (Figure 1) of patients had a great influence on PSC. In some  
8 cases, patients might challenge doctors using a second opinion obtained from other providers, peers  
9 or even the Internet.

10  
11 *'Some patients did not trust us. They would see several doctors for verification.'* (Provider)

12  
13 *'I choose this hospital because it is big hospital with a good environment and many people  
14 come here seeking MCH services.'* (Patient)

15  
16 *'I trust my doctor because one of my friends is acquainted with him.'* (Patient)

17  
18 *'Before making the decision to give birth here, we read nearly all the comments about this  
19 hospital on the internet.'* (Patient)

## 20 21 22 **DISCUSSION**

### 23 **An expanded definition of patient safety**

24 In the context of MCH institutions in China, the concept of patient safety goes beyond the scope of  
25 the definition provided by the World Health Organization: 'the reduction of risk of unnecessary harm  
26 (impairment of structure or function of the body and/or any deleterious effect arising there from)  
27 associated with health care to an acceptable minimum'.<sup>40</sup> Patient safety is no longer limited to  
28 service-associated adverse events. The absence or shortage of the wanted services became a safety  
29 concern because it can also lead to potential harm to patients. Patients often seek services from MCH  
30 institutions for the assurance of safety. Studies show that psychological safety assurance is to some  
31 extent related to distrustful relationships between patients and providers and inadequate informed  
32 consent.<sup>41 42</sup>

33  
34  
35  
36 Patient safety problems are not necessarily a result of medical errors. In this study, our interviewees  
37 expressed concerns about the environmental impacts on patient safety, such as the safety and  
38 security of public spaces. In resource-poor countries where consumers have to pay a large proportion  
39 of medical expenses out of pocket, patient safety can be jeopardized by a lack of financial security.  
40 Spending on unnecessary interventions may not only result in direct harm, it may also prevent  
41 patients from receiving much needed interventions.<sup>43 44</sup> Some other studies also expanded the  
42 definition of patient safety, although from quite a different angle.<sup>45-47</sup>

### 43 **Special characteristics of PSC in MCH institutions**

44  
45 MCH institutions possess some unique characteristics which differentiate them from general hospitals.  
46 Service users in MCH institutions are predominantly women and children. They are usually  
47 disadvantaged with low socioeconomic status, and face significant barriers in engaging with  
48 healthcare decisions and getting access to medical services.<sup>48</sup> MCH services are focused on a special  
49 window of the life cycle (childhood, adolescence and reproduction) and their customers are usually  
50 healthy. They are more likely to experience a higher level of stress when things go wrong compared to  
51 those in illness conditions. MCH institutions in China are considered part of the public health system.  
52 They are obliged to place population health as a priority and work in partnership with various  
53 stakeholders.<sup>20</sup>

54  
55  
56  
57 The 12 dimensions of PSC for MCH institutions share some common features of PSC for general



1  
2  
3 hospitals. Nine of the 12 dimensions resemble those identified in other PSC studies.<sup>10 22 23 49</sup> These are  
4 management support, regulations and procedures, staffing, teamwork, non-punitive response to  
5 adverse events, openness in communication, risk awareness, continuous learning and self-efficacy.<sup>50-53</sup>  
6 The three additional dimensions identified in this study are: patient engagement, defensive medical  
7 practices, and competing interest between public health and individual care. Patient engagement has  
8 recently attracted increasing attention from the international community.<sup>54-56</sup> Meaningful engagement  
9 of patients depends on good PSC. Patient safety culture should place the interest of patients at the  
10 center of medical practices. Defensive medical practices, although not always harmful, have switched  
11 the core value to the interest of care providers. Evidence shows that defensive practices often involve  
12 excessive and sometimes harmful interventions, exacerbating distrust and poor cooperation between  
13 patients and care providers.<sup>57-59</sup> Public health services are the most cost-effective interventions. But a  
14 profit-driven management culture often favors clinical interventions and disease treatment, leaving  
15 public health under-resourced. This will eventually lead to consequences in patient safety.<sup>43 44</sup>  
16 It is important to note that both the health workers and patients who participated in this study  
17 emphasized the importance of individual competency and tended to endorse a punitive strategy for  
18 improving patient safety. This runs counter to a systems strategy, which places a strong emphasis on  
19 'upstream' systemic factors. Although it is fundamental to address system flaws for achieving  
20 sustainable safety outcomes,<sup>60 61</sup> blaming individuals is often emotionally more satisfying.<sup>40 62 63</sup>  
21 Knowledge of errors may help individuals thwart some systemic failures.<sup>64</sup>

### 22 **Challenges for nurturing PSC**

23 The concept of PSC reflects the philosophy of patient-centered health care. In reality, however, the  
24 concerns of health workers may not always be aligned with those of the patients. There may exist  
25 cognitive conflicts and interest conflicts between health workers and patients. This study involved  
26 managers, care providers and patients as participants. We found that patients are more likely to focus  
27 on financial security, psychological safety assurance, and engagement in decision making; whereas,  
28 health workers are more concerned about the organization of technical services. This may impose  
29 serious barriers for health workers to communicate with patients effectively and involve patients in  
30 clinical decisions in a meaningful way. Interest conflicts between patients and providers make the  
31 situation even worse, fueling defensive behaviors from both sides. Cognitive and interest conflicts  
32 threaten mutual understanding, trust and cooperation between patients and health workers, and  
33 thereby damage the safety and quality of patient care.<sup>65-69</sup>

34 Poor PSC can also be shaped by broad policy and social environments. Health workers have to  
35 consider the interests of their employers and follow policy and regulatory requirements. Over the past  
36 few decades, MCH institutions in China have been exposed to intense market competitions. The low  
37 salary and high bonus system encourages health workers to increase services, but sometimes at the  
38 cost of sacrificing patient interests. The distrust of patients in health services is prevalent. In extreme  
39 cases, this has been transformed into medical violence. The legal system and the public media have  
40 played a small role, if at all, in the improvement of social environments.<sup>70-75</sup>

### 41 **Limitations and further studies**

42 This study was conducted in six MCH institutions and the results are context specific. Caution needs to  
43 be taken in relation to the generalization of the results. The study provides a high-level classification of  
44 patient safety, which should not be treated as an operational taxonomy to be used directly in  
45 practices.  
46  
47  
48  
49  
50  
51  
52

1  
2  
3 The PSC framework was developed through a qualitative study. Further studies are needed to quantify  
4 the reliability and validity of the instrument. There is also a need to verify the association between  
5 PSC and patient care outcomes.  
6  
7

### 8 **Conclusion**

9 This study developed a 12-dimensional framework for PSC in MCH institutions in China. Despite  
10 general similarities between this instrument and existing instruments measuring PSC in hospitals,  
11 there are some features which are specific to MCH institutions. Three additional dimensions (patient  
12 engagement, defensive medical practices, and competing interest between public health and  
13 individual care) are included. The focus of our instrument is more about “health” rather than  
14 “diseases”. Adverse events arising from MCH services as well as health consequences as a result of the  
15 absence of needed services (e.g. preventive care) are considered equally important in relation to  
16 patient safety.  
17  
18  
19

20  
21 **Acknowledgements** The authors wish to acknowledge the contributions of the National Center for  
22 Women and Children’s Health and the six MCH institutions for supporting the field work. We thank all  
23 of the interviewers and interviewees, and those who offered help with this study.  
24

25  
26 **Authors’ Contributions** YYW and YW conceived and designed the study and oversaw the data  
27 collection. CL and WL participated in the design of the study and the development of the interview  
28 tools. HS participated in data collection and analyses. YW led the data analyses and writing of the  
29 manuscript. All authors contributed to the drafting of the article and read and approved the final  
30 version of the manuscript.  
31  
32

33 **Funding** This study was funded by Beijing Municipal Education Commission, Beijing Key Disciplines  
34 (Maternal, Child and Adolescent Health).  
35  
36

37 **Competing interests** None declared.  
38

39 **Ethics approval** This study protocol was approved by the Peking University Institutional Review Board  
40 and Peking University Third Hospital Medical Science Research Ethics Committee.  
41  
42

43 **Data Sharing Statement** The raw data supporting the conclusions of this article are included in the  
44 article as interview excerpts. The full interview transcripts remain the property of the Division of  
45 Maternal and Child Health, School of Public Health, Peking University Health Science Centre, which are  
46 accessible by contacting the corresponding author Prof. Yan Wang, email: wangyan@bjmu.edu.cn  
47  
48  
49  
50  
51  
52  
53  
54  
55  
56  
57  
58  
59  
60

## REFERENCES

1. Weaver SJ, Lubomksi LH, Wilson RF, et al. Promoting a culture of safety as a patient safety strategy: a systematic review. *Ann Intern Med* 2013;**158**(5 Pt 2):369-74.
2. Kristensen S, Christensen KB, Jaquet A, et al. Strengthening leadership as a catalyst for enhanced patient safety culture: a repeated cross-sectional experimental study. *BMJ Open* 2016;**6**(5):e010180.
3. Azami-Aghdash S, Ebadifard Azar F, Rezapour A, et al. Patient safety culture in hospitals of Iran: a systematic review and meta-analysis. *Med J Islam Repub Iran* 2015;**29**:251.
4. Azer SA, Baharoon S. Medical error reporting: is it about physicians' knowledge and their practice, or patient safety culture in the workplace? *East Mediterr Health J* 2016;**22**(3):228-9.
5. Verbakel NJ, Langelaan M, Verheij TJ, et al. Effects of patient safety culture interventions on incident reporting in general practice: a cluster randomised trial. *Br J Gen Pract* 2015;**65**(634):e319-29.
6. Bishop AC, Cregan BR. Patient safety culture: finding meaning in patient experiences. *Int J Health Care Qual Assur* 2015;**28**(6):595-610.
7. McKeown C. Patient safety culture: theory, methods & application. *Ergonomics* 2016;**59**(8):1132-3.
8. Singer SJ, Vogus TJ. Safety climate research: taking stock and looking forward. *BMJ Qual Saf* 2013;**22**(1):1-4.
9. Halligan M, Zecevic A. Safety culture in healthcare: a review of concepts, dimensions, measures and progress. *BMJ Qual Saf* 2011;**20**(4):338-43.
10. Sexton JB, Helmreich RL, Neilands TB, et al. The Safety Attitudes Questionnaire: psychometric properties, benchmarking data, and emerging research. *BMC Health Serv Res* 2006;**6**:44.
11. El-Jardali F, Dimassi H, Jamal D, et al. Predictors and outcomes of patient safety culture in hospitals. *BMC Health Serv Res* 2011;**11**:45.
12. Singer S, Lin S, Falwell A, et al. Relationship of safety climate and safety performance in hospitals. *Health Serv Res* 2009;**44**(2 Pt 1):399-421.
13. Hill MR, Roberts MJ, Alderson ML, et al. Safety culture and the 5 steps to safer surgery: an intervention study. *Br J Anaesth* 2015;**114**(6):958-62.
14. Health - United Nations Sustainable Development 2017 [Available from: <http://www.un.org/sustainabledevelopment/health/>].
15. Guo Y, Bai J, Na H. The history of China's maternal and child health care development. *Semin Fetal Neonatal Med* 2015;**20**(5):309-14.
16. Ren Z, Song P, Theodoratou E, et al. China's human resources for maternal and child health: a national sampling survey. *BMC Health Serv Res* 2015;**15**:561.
17. Collaborators GMM. Global, regional, and national levels of maternal mortality, 1990-2015: a systematic analysis for the Global Burden of Disease Study 2015. *Lancet* 2016;**388**(10053):1775-812.
18. Collaborators GCM. Global, regional, national, and selected subnational levels of stillbirths, neonatal, infant, and under-5 mortality, 1980-2015: a systematic analysis for the Global Burden of Disease Study 2015. *Lancet* 2016;**388**(10053):1725-74.
19. The number of medical and health institutions in the country by the end of June 2016 - National Health and Family Planning Commission of the People's Republic of China 2016 [Available from: <http://www.nhfpc.gov.cn/mohwsbwstjxxzx/s7967/201608/87343c7d63ce41ca8d8fddf7a5db>]

- 66b7.shtml.
20. Guidance on standardized organizational construction and management of maternal and child health service institutions - National Health and Family Planning Commission of the People's Republic of China 2016 [Available from: <http://www.nhfpc.gov.cn/fys/s3581/201512/a0dcaf1f20624769a9a3b2dafa0280ab.shtml>].
  21. Feng XL, Theodoratou E, Liu L, et al. Social, economic, political and health system and program determinants of child mortality reduction in China between 1990 and 2006: A systematic analysis. *J Glob Health* 2012;**2**(1):010405.
  22. Wagner C, Smits M, Sorra J, et al. Assessing patient safety culture in hospitals across countries. *Int J Qual Health Care* 2013;**25**(3):213-21.
  23. Singer SJ, Gaba DM, Geppert JJ, et al. The culture of safety: results of an organization-wide survey in 15 California hospitals. *Qual Saf Health Care* 2003;**12**(2):112-8.
  24. Quillivan RR, Burlison JD, Browne EK, et al. Patient Safety Culture and the Second Victim Phenomenon: Connecting Culture to Staff Distress in Nurses. *Jt Comm J Qual Patient Saf* 2016;**42**(8):377-86.
  25. Hoffmann B, Miessner C, Albay Z, et al. Impact of individual and team features of patient safety climate: a survey in family practices. *Ann Fam Med* 2013;**11**(4):355-62.
  26. Nguyen G, Gambashidze N, Ilyas SA, et al. Validation of the safety attitudes questionnaire (short form 2006) in Italian in hospitals in the northeast of Italy. *BMC Health Serv Res* 2015;**15**:284.
  27. Chen IC, Li HH. Measuring patient safety culture in Taiwan using the Hospital Survey on Patient Safety Culture (HSOPSC). *BMC Health Serv Res* 2010;**10**:152.
  28. Nie Y, Mao X, Cui H, et al. Hospital survey on patient safety culture in China. *BMC Health Serv Res* 2013;**13**:228.
  29. Zhu J, Li L, Zhao H, et al. Development of a patient safety climate survey for Chinese hospitals: cross-national adaptation and psychometric evaluation. *BMJ Qual Saf* 2014;**23**(10):847-56.
  30. Zhou P, Bundorf MK, Gu J, et al. Survey on patient safety climate in public hospitals in China. *BMC Health Serv Res* 2015;**15**:53.
  31. GUO X ZW. Revision of Safety Attitudes Questionnaire and ... *Chinese Journal of Nursing Education* 2010(04):151-54.
  32. Nieva VF, Sorra J. Safety culture assessment: a tool for improving patient safety in healthcare organizations. *Qual Saf Health Care* 2003;**12 Suppl 2**:ii17-23.
  33. Charmaz K. *Constructing grounded theory*. 2nd edition ed. London ; Thousand Oaks, Calif.: Sage, 2014.
  34. Foley G, Timonen V. Using Grounded Theory Method to Capture and Analyze Health Care Experiences. *Health Serv Res* 2015;**50**(4):1195-210.
  35. Liu C, Liu W, Wang Y, et al. Patient safety culture in China: a case study in an outpatient setting in Beijing. *BMJ Qual Saf* 2014;**23**(7):556-64.
  36. Dovey SM, Meyers DS, Phillips RL, et al. A preliminary taxonomy of medical errors in family practice. *Qual Saf Health Care* 2002;**11**(3):233-8.
  37. Clayman ML, Makoul G, Harper MM, et al. Development of a shared decision making coding system for analysis of patient-healthcare provider encounters. *Patient Educ Couns* 2012;**88**(3):367-72.
  38. Kirilenko AP, Stepchenkova S. Inter-Coder Agreement in One-to-Many Classification: Fuzzy Kappa. *PLoS One* 2016;**11**(3):e0149787.

39. Bottle A, Jarman B, Aylin P. Hospital standardized mortality ratios: sensitivity analyses on the impact of coding. *Health Serv Res* 2011;**46**(6pt1):1741-61.
40. World Health Organization., WHO Patient Safety. *Patient safety curriculum guide: multi-professional edition*. Geneva: World Health Organization, 2011.
41. Duckett J, Hunt K, Munro N, et al. Does distrust in providers affect health-care utilization in China? *Health Policy Plan* 2016;**31**(8):1001-9.
42. Narveson J. Comment on Levy's 'Forced to be free? Increasing patient autonomy by constraining it'. *J Med Ethics* 2014;**40**(5):302-3.
43. McGregor MJ, Cohen M, Stocks-Rankin CR, et al. Complaints in for-profit, non-profit and public nursing homes in two Canadian provinces. *Open Med* 2011;**5**(4):e183-92.
44. Comondore VR, Devereaux PJ, Zhou Q, et al. Quality of care in for-profit and not-for-profit nursing homes: systematic review and meta-analysis. *BMJ* 2009;**339**:b2732.
45. Klemp K, Dovey S, Valderas JM, et al. Developing a patient safety incident classification system for primary care. A literature review and Delphi-survey by the LINNEAUS collaboration on patient safety in primary care. *Eur J Gen Pract* 2015;**21** Suppl:35-8.
46. Keriél-Gascou M, Brami J, Chanière M, et al. [Which definition and taxonomy of incident to use for a French reporting system in primary care settings?]. *Rev Epidemiol Sante Publique* 2014;**62**(1):41-52.
47. Mikkelsen KL, Thommesen J, Andersen HB. Validating the Danish adaptation of the World Health Organization's International Classification for Patient Safety classification of patient safety incident types. *Int J Qual Health Care* 2013;**25**(2):132-40.
48. Sustainable Development Goals (SDGs): World Health Organization; 2017 [updated 2017-04-11 02:38:11. Available from: <http://www.who.int/sdg/en/>.
49. Parker D. Managing risk in healthcare: understanding your safety culture using the Manchester Patient Safety Framework (MaPSaF). *J Nurs Manag* 2009;**17**(2):218-22.
50. Zaheer S, Ginsburg L, Chuang YT, et al. Patient safety climate (PSC) perceptions of frontline staff in acute care hospitals: examining the role of ease of reporting, unit norms of openness, and participative leadership. *Health Care Manage Rev* 2015;**40**(1):13-23.
51. Taylor JA, Dominici F, Agnew J, et al. Do nurse and patient injuries share common antecedents? An analysis of associations with safety climate and working conditions. *BMJ Qual Saf* 2012;**21**(2):101-11.
52. Wami SD, Demssie AF, Wassie MM, et al. Patient safety culture and associated factors: A quantitative and qualitative study of healthcare workers' view in Jimma zone Hospitals, Southwest Ethiopia. *BMC Health Serv Res* 2016;**16**:495.
53. Morrow KJ, Gustavson AM, Jones J. Speaking up behaviours (safety voices) of healthcare workers: A metasynthesis of qualitative research studies. *Int J Nurs Stud* 2016;**64**:42-51.
54. Davis RE, Jacklin R, Sevdalis N, et al. Patient involvement in patient safety: what factors influence patient participation and engagement? *Health Expect* 2007;**10**(3):259-67.
55. Sahlström M, Partanen P, Rathert C, et al. Patient participation in patient safety still missing: Patient safety experts' views. *Int J Nurs Pract* 2016;**22**(5):461-69.
56. Vaismoradi M, Jordan S, Kangasniemi M. Patient participation in patient safety and nursing input - a systematic review. *J Clin Nurs* 2015;**24**(5-6):627-39.
57. Deng W, Klemetti R, Long Q, et al. Cesarean section in Shanghai: women's or healthcare provider's preferences? *BMC Pregnancy Childbirth* 2014;**14**:285.

- 1
  - 2
  - 3
  - 4
  - 5
  - 6
  - 7
  - 8
  - 9
  - 10
  - 11
  - 12
  - 13
  - 14
  - 15
  - 16
  - 17
  - 18
  - 19
  - 20
  - 21
  - 22
  - 23
  - 24
  - 25
  - 26
  - 27
  - 28
  - 29
  - 30
  - 31
  - 32
  - 33
  - 34
  - 35
  - 36
  - 37
  - 38
  - 39
  - 40
  - 41
  - 42
  - 43
  - 44
  - 45
  - 46
  - 47
  - 48
  - 49
  - 50
  - 51
  - 52
  - 53
  - 54
  - 55
  - 56
  - 57
  - 58
  - 59
  - 60
58. Renkema E, Broekhuis M, Ahaus K. Conditions that influence the impact of malpractice litigation risk on physicians' behavior regarding patient safety. *BMC Health Serv Res* 2014;**14**:38.
59. Ortashi O, Virdee J, Hassan R, et al. The practice of defensive medicine among hospital doctors in the United Kingdom. *BMC Med Ethics* 2013;**14**:42.
60. Charles R, Hood B, Derosier JM, et al. How to perform a root cause analysis for workup and future prevention of medical errors: a review. *Patient Saf Surg* 2016;**10**:20.
61. Holdsworth MT, Bond R, Parikh S, et al. Root Cause Analysis Design and Its Application to Pharmacy Education. *Am J Pharm Educ* 2015;**79**(7):99.
62. Reason J. Human error: models and management. *BMJ* 2000;**320**(7237):768-70.
63. Reason J. Safety in the operating theatre - Part 2: human error and organisational failure. *Qual Saf Health Care* 2005;**14**(1):56-60.
64. Reason J. Beyond the organisational accident: the need for "error wisdom" on the frontline. *Qual Saf Health Care* 2004;**13 Suppl 2**:ii28-33.
65. Van Bogaert P, Peremans L, Diltour N, et al. Staff Nurses' Perceptions and Experiences about Structural Empowerment: A Qualitative Phenomenological Study. *PLoS One* 2016;**11**(4):e0152654.
66. Oduro-Mensah E, Kwamie A, Antwi E, et al. Care decision making of frontline providers of maternal and newborn health services in the greater Accra region of Ghana. *PLoS One* 2013;**8**(2):e55610.
67. Rose DE, Tisnado DM, Tao ML, et al. Prevalence, predictors, and patient outcomes associated with physician co-management: findings from the Los Angeles Women's Health Study. *Health Serv Res* 2012;**47**(3 Pt 1):1091-116.
68. Lee King PA, Cederbaum JA, Kurzban S, et al. Role of patient treatment beliefs and provider characteristics in establishing patient-provider relationships. *Fam Pract* 2015;**32**(2):224-31.
69. Andoh-Adjei FX, Cornelissen D, Asante FA, et al. Does capitation payment under national health insurance affect subscribers' trust in their primary care provider? a cross-sectional survey of insurance subscribers in Ghana. *BMC Health Serv Res* 2016;**16**(1):437.
70. Zhang L, Stone TE, Zhang J. Understanding the rise of Yinao in China: A commentary on the little known phenomenon of healthcare violence. *Nurs Health Sci* 2016.
71. Peng W, Ding G, Tang Q, et al. Continuing violence against medical personnel in China: A flagrant violation of Chinese law. *Biosci Trends* 2016;**10**(3):240-3.
72. Hui EC. The contemporary healthcare crisis in China and the role of medical professionalism. *J Med Philos* 2010;**35**(4):477-92.
73. Huong DB, Phuong NK, Bales S, et al. Rural health care in Vietnam and China: conflict between market reforms and social need. *Int J Health Serv* 2007;**37**(3):555-72.
74. Hou J, Michaud C, Li Z, et al. Transformation of the education of health professionals in China: progress and challenges. *Lancet* 2014;**384**(9945):819-27.
75. Violence against doctors: Why China? Why now? What next? *Lancet* 2014;**383**(9922):1013.

1  
2  
3  
4  
5  
6  
7  
8  
9  
10  
11  
12  
13  
14  
15  
16  
17  
18  
19  
20  
21  
22  
23  
24  
25  
26  
27  
28  
29  
30  
31  
32  
33  
34  
35  
36  
37  
38  
39  
40  
41  
42  
43  
44  
45  
46  
47  
48  
49  
50  
51  
52  
53  
54  
55  
56  
57  
58  
59  
60

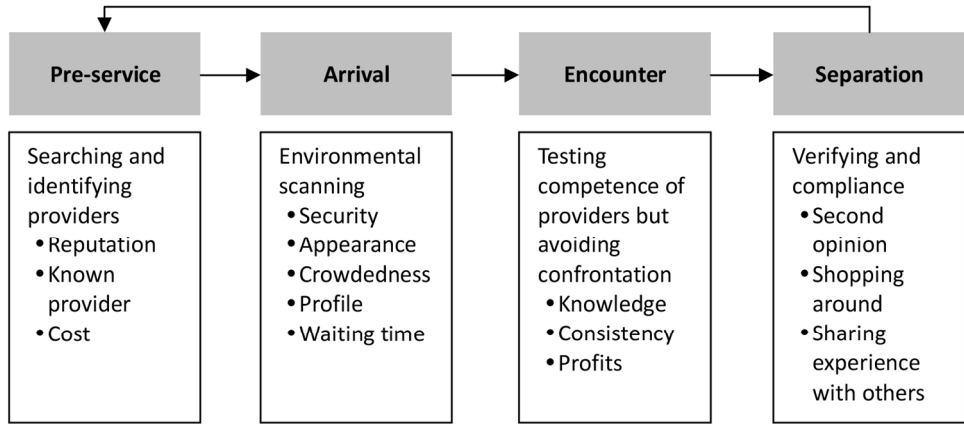

Figure 1 How patients make decisions when seeking health services

Figure 1 How patients make decisions when seeking health services

146x82mm (300 x 300 DPI)

review only

Appendix Table 1 The general characteristics of six MCH institutions

| Province | MCH institution | Number of |      |                             |                               |                             |
|----------|-----------------|-----------|------|-----------------------------|-------------------------------|-----------------------------|
|          |                 | Staff     | Beds | Outpatients (*1000per year) | Hospitalized (*1000 per year) | Deliveries (*1000 per year) |
| Hebei    | SJZ             | 1022      | 450  | 520                         | 21                            | 16                          |
|          | MC              | 90        | 40   | 15                          | 1.6                           | 1                           |
|          | XH              | 110       | 60   | 120                         | 2                             | 1                           |
| Beijing  | HD              | 729       | 460  | 740                         | 20                            | 14                          |
|          | CY              | 443       | 125  | 280                         | 6                             | 4                           |
|          | FT              | 362       | 120  | 280                         | 3.5                           | 2.2                         |

\*Rough data provided by administrative managers of those MCH institutions.

Appendix Table 2 The general characteristics of 118 participants

| Characteristics | Health workers(n1=79) |                        |           | Patients (n4=39) | Total (N=118) |
|-----------------|-----------------------|------------------------|-----------|------------------|---------------|
|                 | Managers (n2=20)      | Care providers (n3=59) |           |                  |               |
| Sex             | Male                  | 5(25.0%)               | 3( 5.1%)  | 13(33.3%)        | 21(17.8%)     |
|                 | Female                | 15(75.0%)              | 56(94.9%) | 26(66.7%)        | 97(82.2%)     |
| Age             | 20-29 years           | 0( 0.0%)               | 8(13.6%)  | 16(41.0%)        | 24(20.3%)     |
|                 | 30-39 years           | 7(35.0%)               | 33(55.9%) | 13(33.3%)        | 53(44.9%)     |
|                 | 40-49 years           | 9(45.0%)               | 16(27.1%) | 1( 2.6%)         | 26(22.0%)     |
|                 | 50-59 years           | 3(15.0%)               | 1( 1.7%)  | 4(10.3%)         | 8( 6.8%)      |
|                 | 60 years or above     | 1( 5.0%)               | 1( 1.7%)  | 0( 0.0%)         | 2( 1.7%)      |
|                 | Missing               | 0( 0.0%)               | 0( 0.0%)  | 5(12.8%)         | 5( 4.2%)      |
| Education       | Primaryorunder        | 0( 0.0%)               | 0( 0.0%)  | 4(10.3%)         | 4( 3.4%)      |
|                 | Secondary             | 0( 0.0%)               | 0( 0.0%)  | 7(17.9%)         | 7( 5.9%)      |
|                 | Juniorcollege         | 3(15.0%)               | 23(39.0%) | 6(15.4%)         | 32(27.1%)     |
|                 | Undergraduate         | 10(50.0%)              | 25(42.4%) | 6(15.4%)         | 41(34.7%)     |
|                 | Masterorabove         | 2(10.0%)               | 9(15.3%)  | 2( 5.1%)         | 13(11.0%)     |
|                 | Missing               | 5(25.0%)               | 2( 3.4%)  | 14(35.9%)        | 21(17.8%)     |



Appendix Table 3 Other general characteristics of 79 health workers

| Characteristics     |                   | Managers<br>(n2=20) | Care providers<br>(n3=59) | Total<br>(n1=79) |
|---------------------|-------------------|---------------------|---------------------------|------------------|
| Working years       | 0-4 years         | 0( 0.0%)            | 3( 5.1%)                  | 3( 3.8%)         |
|                     | 5-9 years         | 3(15.0%)            | 14(23.7%)                 | 17(21.5%)        |
|                     | 10 years or above | 17(85.0%)           | 42(71.2%)                 | 59(74.7%)        |
| Professional title* | Clinicians        | 7(35.0%)            | 14(23.7%)                 | 21(26.6%)        |
|                     | Public health     | 2(10.0%)            | 15(25.4%)                 | 17(21.5%)        |
|                     | Nurses            | 5(25.0%)            | 21(35.6%)                 | 26(32.9%)        |
|                     | Administrative    | 6(30.0%)            | 0( 0.0%)                  | 6( 7.6%)         |
|                     | Others            | 0( 0.0%)            | 9(15.3%)                  | 9(11.4%)         |

\*Professional title is a qualification authenticated by health administrative bureaus, which qualifies medical professionals' specialty legally. Most administrative managers of medical institutions in China had been promoted from frontline staff rather than specialized administrative managers.

Appendix Table 4 The coding reliability of 12 re-test cases

| No. of cases | Group         | Consistency reliability between researchers | Re-test reliability |
|--------------|---------------|---------------------------------------------|---------------------|
| 1            | Manager       | 85.0%                                       | 68.2%               |
| 2            | Manager       | 68.8%                                       | 66.7%               |
| 3            | Care provider | 79.4%                                       | 62.2%               |
| 4            | Care provider | 85.0%                                       | 73.9%               |
| 5            | Care provider | 66.7%                                       | 69.2%               |
| 6            | Care provider | 63.3%                                       | 66.1%               |
| 7            | Care provider | 75.6%                                       | 76.1%               |
| 8            | Care provider | 82.9%                                       | 82.5%               |
| 9            | Patient       | 100.0%                                      | 66.7%               |
| 10           | Patient       | 88.2%                                       | 73.7%               |
| 11           | Patient       | 92.9%                                       | 62.5%               |
| 12           | Patient       | 75.0%                                       | 63.9%               |

1  
2  
3  
4  
5  
6  
7  
8  
9  
10  
11  
12  
13  
14  
15  
16  
17  
18  
19  
20  
21  
22  
23  
24  
25  
26  
27  
28  
29  
30  
31  
32  
33  
34  
35  
36  
37  
38  
39  
40  
41  
42  
43  
44  
45  
46  
47  
48  
49

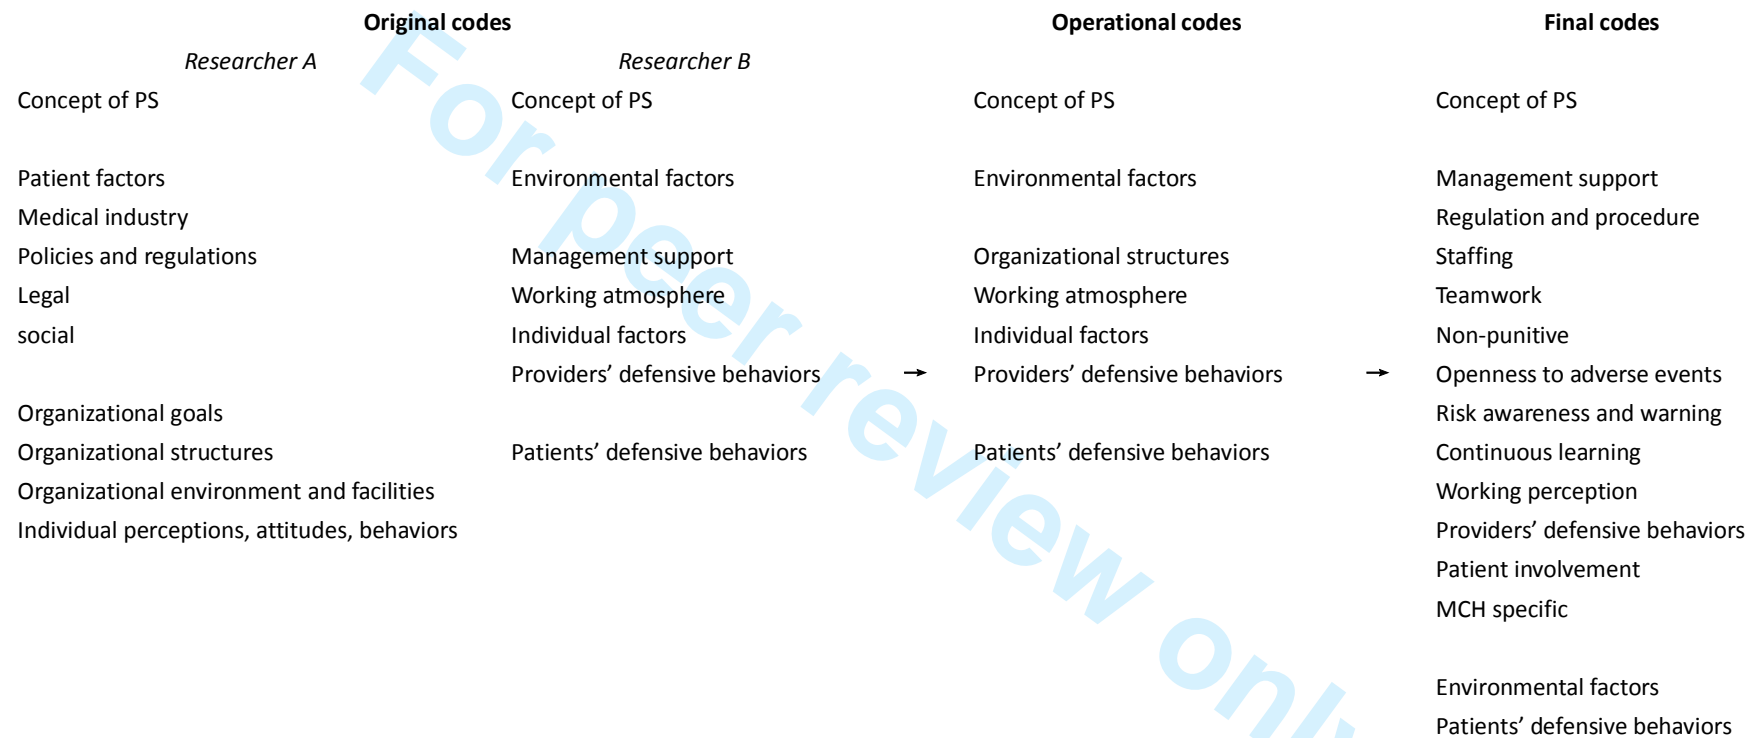

**Appendix Figure 1 The modifying process of main dimensions coded by two parallel researchers**

*\*Not showing specific sub-dimensions and items in each main dimension, and some dimensions of final codes came from sub-dimensions of operational codes.*

Appendix Table 5 Dimensions and items of patient safety culture in MCH institutions

| Dimensions/items                                                                                    | Health workers (n1=79) |                        |                  | Total (N=118)    |
|-----------------------------------------------------------------------------------------------------|------------------------|------------------------|------------------|------------------|
|                                                                                                     | Managers (n2=20)       | Care providers (n3=59) | Patients (n4=39) |                  |
| <b>1. Management support</b>                                                                        | <b>19(95.0%)</b>       | <b>53(89.8%)</b>       | <b>17(43.6%)</b> | <b>89(75.4%)</b> |
| 1.1 Management gives priority to PS, considering other goals like profits or reputations.           | 10(50.0%)              | 14(23.7%)              | 3( 7.7%)         | 27(22.9%)        |
| 1.2 Management is committed to continuous improvement of PS.                                        | 13(65.0%)              | 27(45.8%)              | 2( 5.1%)         | 42(35.6%)        |
| 1.3 Management is committed to create a good working atmosphere.                                    | 1( 5.0%)               | 1( 1.7%)               | 0( 0.0%)         | 2( 1.7%)         |
| 1.4 Management provides adequate allocation of resources to the department where I work.            | 2(10.0%)               | 15(25.4%)              | 0( 0.0%)         | 17(14.4%)        |
| 1.5 Management thinks highly of improving organizational environments and medical facilities.       | 16(80.0%)              | 38(64.4%)              | 14(35.9%)        | 68(57.6%)        |
| 1.6 Management pays more attention to profit-making departments than others.                        | 6(30.0%)               | 11(18.6%)              | 0( 0.0%)         | 17(14.4%)        |
| <b>2.Regulation and procedure</b>                                                                   | <b>19(95.0%)</b>       | <b>54(91.5%)</b>       | <b>13(33.3%)</b> | <b>86(72.9%)</b> |
| 2.1Innovations of regulations and procedures are rigorous and flexible.                             | 6(30.0%)               | 10(16.9%)              | 1( 2.6%)         | 17(14.4%)        |
| 2.2Motivatemechanism of the organization is fair and feasible.                                      | 9(45.0%)               | 30(50.8%)              | 0( 0.0%)         | 39(33.1%)        |
| 2.3 Some regulations and procedures are unreasonable and lead to inconveniences, barriers or risks. | 14(70.0%)              | 37(62.7%)              | 13(33.3%)        | 64(54.2%)        |
| 2.4Frontlines can obey regulations and procedures in the organization.                              | 16(80.0%)              | 26(44.1%)              | 2( 5.1%)         | 44(37.3%)        |
| 2.5Risk preventing and responding mechanism has been introduced to reduce or avoid errors.          | 6(30.0%)               | 15(25.4%)              | 0( 0.0%)         | 21(17.8%)        |
| 2.6 Frontline staff can be able to involve in decision-making.                                      | 3(15.0%)               | 10(16.9%)              | 0( 0.0%)         | 13(11.0%)        |
| <b>3.Staffing</b>                                                                                   | <b>16(80.0%)</b>       | <b>52(88.1%)</b>       | <b>16(41.0%)</b> | <b>84(71.2%)</b> |
| 3.1I often feel busy too much.                                                                      | 3(15.0%)               | 9(15.3%)               | 4(10.3%)         | 16(13.6%)        |
| 3.2Staffing is far from sufficient to deal with workload.                                           | 13(65.0%)              | 41(69.5%)              | 11(28.2%)        | 65(55.1%)        |
| 3.3 Because of overload working, we cannot provide patients the best services as we could.          | 13(65.0%)              | 48(81.4%)              | 10(25.6%)        | 71(60.2%)        |
| <b>4.Teamwork</b>                                                                                   | <b>13(65.0%)</b>       | <b>47(79.7%)</b>       | <b>5(12.8%)</b>  | <b>65(55.1%)</b> |
| 4.1Referrals between the organization and other institutions are efficient to ensure PS.            | 5(25.0%)               | 9(15.3%)               | 3( 7.7%)         | 17(14.4%)        |
| 4.2 Cross-department teamwork in the organization is not satisfying.                                | 9(45.0%)               | 34(57.6%)              | 1( 2.6%)         | 44(37.3%)        |
| 4.3Communication is not pleasant between supervisors and subordinates.                              | 3(15.0%)               | 3( 5.1%)               | 0( 0.0%)         | 6( 5.1%)         |

|                                                                                                         |                  |                  |                  |                  |
|---------------------------------------------------------------------------------------------------------|------------------|------------------|------------------|------------------|
| 4.4 Handoffs are handled seriously and carefully.                                                       | 1( 5.0%)         | 8(13.6%)         | 0( 0.0%)         | 9( 7.6%)         |
| 4.5 Teamwork is satisfying in the department where I work.                                              | 8(40.0%)         | 31(52.5%)        | 1( 2.6%)         | 40(33.9%)        |
| <b>5. Non-punitive response to adverse events</b>                                                       | <b>17(85.0%)</b> | <b>42(71.2%)</b> | <b>6(15.4%)</b>  | <b>65(55.1%)</b> |
| 5.1 Frontlines might not report adverse events happened due to worries about punishments.               | 4(20.0%)         | 4( 6.8%)         | 0( 0.0%)         | 8( 6.8%)         |
| 5.2 Frontlines are encouraged to report adverse events.                                                 | 5(25.0%)         | 17(28.8%)        | 0( 0.0%)         | 22(18.6%)        |
| 5.3 Adverse events are mostly attributed to individuals in the organization.                            | 2(10.0%)         | 2( 3.4%)         | 6(15.4%)         | 10( 8.5%)        |
| 5.4 Feedback of adverse events reported is delivered in time.                                           | 3(15.0%)         | 7(11.9%)         | 0( 0.0%)         | 10( 8.5%)        |
| 5.5 Efforts are much engaged in preventing adverse events to reoccur.                                   | 2(10.0%)         | 18(30.5%)        | 0( 0.0%)         | 20(16.9%)        |
| 5.6 In the organization, it is preferred to learn from adverse events than blame or punish individuals. | 17(85.0%)        | 41(69.5%)        | 0( 0.0%)         | 58(49.2%)        |
| <b>6. Openness to adverse events</b>                                                                    | <b>10(50.0%)</b> | <b>38(64.4%)</b> | <b>0( 0.0%)</b>  | <b>48(40.7%)</b> |
| 6.1 If adverse event happen and might harm patients, I will report it.                                  | 8(40.0%)         | 21(35.6%)        | 0( 0.0%)         | 29(24.6%)        |
| 6.2 If adverse event happen but nearly not harm patients, I will report it as well.                     | 10(50.0%)        | 22(37.3%)        | 0( 0.0%)         | 32(27.1%)        |
| 6.3 If adverse event happen to colleagues, I will report it as well.                                    | 5(25.0%)         | 20(33.9%)        | 0( 0.0%)         | 25(21.2%)        |
| 6.4 If adverse event happen, individuals involved will be regarded by colleagues not as usual.          | 1( 5.0%)         | 7(11.9%)         | 0( 0.0%)         | 8( 6.8%)         |
| 6.5 It is not superstitious to discuss adverse events among colleagues.                                 | 5(25.0%)         | 25(42.4%)        | 0( 0.0%)         | 30(25.4%)        |
| 6.6 I am not worried about discussing my errors.                                                        | 2(10.0%)         | 4( 6.8%)         | 0( 0.0%)         | 6( 5.1%)         |
| 6.7 If adverse event happen and is not found by patient, he/she will be not informed to avoid dispute.  | 3(15.0%)         | 12(20.3%)        | 0( 0.0%)         | 15(12.7%)        |
| 6.8 If adverse event happen, patient will be comforted to relieve feelings of unsafety.                 | 5(25.0%)         | 6(10.2%)         | 0( 0.0%)         | 11( 9.3%)        |
| <b>7. Risk awareness and warning</b>                                                                    | <b>15(75.0%)</b> | <b>44(74.6%)</b> | <b>13(33.3%)</b> | <b>72(61.0%)</b> |
| 7.1 Besides incidents, management pay much attention to errors or potential risks as well.              | 3(15.0%)         | 6(10.2%)         | 0( 0.0%)         | 9( 7.6%)         |
| 7.2 If potential risks emerge, efforts will be much engaged to avoid reoccurring.                       | 7(35.0%)         | 17(28.8%)        | 0( 0.0%)         | 24(20.3%)        |
| 7.3 I cannot ignore errors and potential risks in work.                                                 | 1( 5.0%)         | 5( 8.5%)         | 0( 0.0%)         | 6( 5.1%)         |
| 7.4 I agree that most of errors are preventable.                                                        | 6(30.0%)         | 16(27.1%)        | 2( 5.1%)         | 24(20.3%)        |
| 7.5 I agree that 'to err is human'.                                                                     | 6(30.0%)         | 17(28.8%)        | 6(15.4%)         | 29(24.6%)        |
| 7.6 I consider my work as part of PS.                                                                   | 11(55.0%)        | 26(44.1%)        | 2( 5.1%)         | 39(33.1%)        |
| <b>8. Continuous learning</b>                                                                           | <b>19(95.0%)</b> | <b>55(93.2%)</b> | <b>20(51.3%)</b> | <b>94(79.7%)</b> |

1  
2  
3  
4  
5  
6  
7  
8  
9  
10  
11  
12  
13  
14  
15  
16  
17  
18  
19  
20  
21  
22  
23  
24  
25  
26  
27  
28  
29  
30  
31  
32  
33  
34  
35  
36  
37  
38  
39  
40  
41  
42  
43  
44  
45  
46  
47  
48  
49

|                                                                                                           |                   |                  |                  |                   |
|-----------------------------------------------------------------------------------------------------------|-------------------|------------------|------------------|-------------------|
| 8.1 Continuous learning is considered as an important thing in the organization.                          | 15(75.0%)         | 40(67.8%)        | 4(10.3%)         | 59(50.0%)         |
| 8.2 Colleagues always discuss how to improve work.                                                        | 7(35.0%)          | 30(50.8%)        | 0( 0.0%)         | 37(31.4%)         |
| 8.3 I am competent to handle my job.                                                                      | 16(80.0%)         | 39(66.1%)        | 19(48.7%)        | 74(62.7%)         |
| 8.4 I need to learn continuously.                                                                         | 12(60.0%)         | 35(59.3%)        | 2( 5.1%)         | 49(41.5%)         |
| 8.5 New employees are trained enough to be acquainted with regulations and procedures.                    | 7(35.0%)          | 17(28.8%)        | 0( 0.0%)         | 24(20.3%)         |
| 8.6 Staff is trained enough (not limited to knowledge and skills).                                        | 10(50.0%)         | 40(67.8%)        | 1( 2.6%)         | 51(43.2%)         |
| <b>9. Working perception</b>                                                                              | <b>20(100.0%)</b> | <b>54(91.5%)</b> | <b>37(94.9%)</b> | <b>111(94.1%)</b> |
| 9.1 I have a sense of satisfaction and accomplishment in my work.                                         | 9(45.0%)          | 21(35.6%)        | 0( 0.0%)         | 30(25.4%)         |
| 9.2 I feel tired of my work.                                                                              | 13(65.0%)         | 22(37.3%)        | 2( 5.1%)         | 37(31.4%)         |
| 9.3 I can receive patients with compassion and empathy.                                                   | 13(65.0%)         | 30(50.8%)        | 14(35.9%)        | 57(48.3%)         |
| 9.4 I can perform patience and kind attitudes in my work.                                                 | 14(70.0%)         | 41(69.5%)        | 37(94.9%)        | 92(78.0%)         |
| 9.5 I work seriously and responsibly.                                                                     | 12(60.0%)         | 36(61.0%)        | 13(33.3%)        | 61(51.7%)         |
| <b>10. Providers' defensive behaviors</b>                                                                 | <b>9(45.0%)</b>   | <b>22(37.3%)</b> | <b>9(23.1%)</b>  | <b>40(33.9%)</b>  |
| 10.1 To avoid high risk, we might refuse patients who we are able to treat in fact.                       | 2(10.0%)          | 9(15.3%)         | 0( 0.0%)         | 11( 9.3%)         |
| 10.2 To avoid dispute, I might yield to patient, rather than adhere to rules and guidelines.              | 5(25.0%)          | 15(25.4%)        | 2( 5.1%)         | 22(18.6%)         |
| 10.3 To avoid dispute, we have to do massive informed consents in writing or orally to protect ourselves. | 4(20.0%)          | 7(11.9%)         | 3( 7.7%)         | 14(11.9%)         |
| 10.4 Unnecessary interventions exist in the organization.                                                 | 3(15.0%)          | 2( 3.4%)         | 5(12.8%)         | 10( 8.5%)         |
| <b>11. Patient involvement</b>                                                                            | <b>15(75.0%)</b>  | <b>44(74.6%)</b> | <b>34(87.2%)</b> | <b>93(78.8%)</b>  |
| 11.1 I inform patients (like alternative plans and risks) as enough as I can.                             | 13(65.0%)         | 42(71.2%)        | 34(87.2%)        | 89(75.4%)         |
| 11.2 I response to any question of patients.                                                              | 0( 0.0%)          | 9(15.3%)         | 13(33.3%)        | 22(18.6%)         |
| 11.3 We often take advice from patients.                                                                  | 7(35.0%)          | 13(22.0%)        | 12(30.8%)        | 32(27.1%)         |
| 11.4 We emphasize health education to patients.                                                           | 5(25.0%)          | 19(32.2%)        | 7(17.9%)         | 31(26.3%)         |
| 11.5 I respect patient's willing and rights.                                                              | 4(20.0%)          | 21(35.6%)        | 7(17.9%)         | 32(27.1%)         |
| 11.6 Patients are encouraged to participate in risk management in the organization.                       | 4(20.0%)          | 13(22.0%)        | 9(23.1%)         | 26(22.0%)         |
| <b>12. MCH specific</b>                                                                                   | <b>6(30.0%)</b>   | <b>6(10.2%)</b>  | <b>0( 0.0%)</b>  | <b>12(10.2%)</b>  |
| 12.1 Management doesn't support to complete all of public health tasks.                                   | 8(40.0%)          | 14(23.7%)        | 0( 0.0%)         | 22(18.6%)         |

1  
2  
3  
4  
5  
6  
7  
8  
9  
10  
11  
12  
13  
14  
15  
16  
17  
18  
19  
20  
21  
22  
23  
24  
25  
26  
27  
28  
29  
30  
31  
32  
33  
34  
35  
36  
37  
38  
39  
40  
41  
42  
43  
44  
45  
46  
47  
48  
49

|                                                                                                     |          |           |          |           |
|-----------------------------------------------------------------------------------------------------|----------|-----------|----------|-----------|
| 12.2 Staffing allocated on public health is insufficient.                                           | 4(20.0%) | 7(11.9%)  | 0( 0.0%) | 11( 9.3%) |
| 12.3 Staffing allocation make priority to clinic departments rather than public health departments. | 1( 5.0%) | 1( 1.7%)  | 0( 0.0%) | 2( 1.7%)  |
| 12.4 Our cooperation with other MCH institutions is satisfying.                                     | 4(20.0%) | 13(22.0%) | 1( 2.6%) | 18(15.3%) |
| 12.5 I agree that public health is very important and necessary part of a MCH institution.          | 6(30.0%) | 4( 6.8%)  | 0( 0.0%) | 10( 8.5%) |
| 12.6 I agree that public health should be given more attentions than is now.                        | 3(15.0%) | 1( 1.7%)  | 0( 0.0%) | 4( 3.4%)  |
| 12.7 Public health workers are neglected frequently.                                                | 0( 0.0%) | 1( 1.7%)  | 0( 0.0%) | 1( 0.8%)  |
| 12.8 Public health departments are prejudiced as 'special' in the organization.                     | 0( 0.0%) | 3( 5.1%)  | 0( 0.0%) | 3( 2.5%)  |

## Consolidated criteria for reporting qualitative studies (COREQ): 32-item checklist

| No                                             | Item                                     | Guide questions/description                                                                                                                      |            |
|------------------------------------------------|------------------------------------------|--------------------------------------------------------------------------------------------------------------------------------------------------|------------|
| <b>Domain 1: Research team and reflexivity</b> |                                          |                                                                                                                                                  |            |
| Personal Characteristics                       |                                          |                                                                                                                                                  |            |
| 1.                                             | Interviewer/facilitator                  | Which author/s conducted the interview or focus group?                                                                                           | Page 4     |
| 2.                                             | Credentials                              | What were the researcher's credentials? <i>E.g. PhD, MD</i>                                                                                      | Page 1,4   |
| 3.                                             | Occupation                               | What was their occupation at the time of the study?                                                                                              | Page 1,3   |
| 4.                                             | Gender                                   | Was the researcher male or female?                                                                                                               | Page 3     |
| 5.                                             | Experience and training                  | What experience or training did the researcher have?                                                                                             | Page 1,3,4 |
| Relationship with participants                 |                                          |                                                                                                                                                  |            |
| 6.                                             | Relationship established                 | Was a relationship established prior to study commencement?                                                                                      | Page 4     |
| 7.                                             | Participant knowledge of the interviewer | What did the participants know about the researcher? <i>e.g. personal goals, reasons for doing the research</i>                                  | Page 4     |
| 8.                                             | Interviewer characteristics              | What characteristics were reported about the interviewer/facilitator? <i>e.g. Bias, assumptions, reasons and interests in the research topic</i> | Page 1,3,4 |
| <b>Domain 2: Study design</b>                  |                                          |                                                                                                                                                  |            |
| Theoretical framework                          |                                          |                                                                                                                                                  |            |
| 10.                                            | Sampling                                 | How were participants selected? <i>e.g. purposive, convenience, consecutive, snowball</i>                                                        | Page 4     |
| 11.                                            | Method of approach                       | How were participants approached? <i>e.g. face-to-face, telephone, mail, email</i>                                                               | Page 4     |
| 12.                                            | Sample size                              | How many participants were in the study?                                                                                                         | Page 4     |
| 13.                                            | Non-participation                        | How many people refused to participate or dropped out? Reasons?                                                                                  | Page 4     |
| Setting                                        |                                          |                                                                                                                                                  |            |
| 14.                                            | Setting of data collection               | Where was the data collected? <i>e.g. home, clinic, workplace</i>                                                                                | Page 4     |
| 15.                                            | Presence of non-participants             | Was anyone else present besides the participants and researchers?                                                                                | Page 4,14  |
| 16.                                            | Description of sample                    | What are the important characteristics of the sample? <i>e.g. demographic data, date</i>                                                         | Page 4     |
| Data collection                                |                                          |                                                                                                                                                  |            |
| 17.                                            | Interview guide                          | Were questions, prompts, guides provided by the authors? Was it pilot tested?                                                                    | Page 4     |
| 18.                                            | Repeat interviews                        | Were repeat interviews carried out? If yes, how many?                                                                                            | Page 4     |
| 19.                                            | Audio/visual                             | Did the research use audio or visual recording to                                                                                                | Page 4     |

|                                        |                                |                                                                                                                                             |                                                                  |
|----------------------------------------|--------------------------------|---------------------------------------------------------------------------------------------------------------------------------------------|------------------------------------------------------------------|
|                                        | recording                      | collect the data?                                                                                                                           |                                                                  |
| 20.                                    | Field notes                    | Were field notes made during and/or after the interview or focus group?                                                                     | Page 4                                                           |
| 21.                                    | Duration                       | What was the duration of the interviews or focus group?                                                                                     | Page 4                                                           |
| 22.                                    | Data saturation                | Was data saturation discussed?                                                                                                              | Page 4                                                           |
| 23.                                    | Transcripts returned           | Were transcripts returned to participants for comment and/or correction?                                                                    | No, because we did not keep contact details of the participants. |
| <b>Domain 3: Analysis and findings</b> |                                |                                                                                                                                             |                                                                  |
| Data analysis                          |                                |                                                                                                                                             |                                                                  |
| 24.                                    | Number of data coders          | How many data coders coded the data?                                                                                                        | Page 5                                                           |
| 25.                                    | Description of the coding tree | Did authors provide a description of the coding tree?                                                                                       | Page 4-5                                                         |
| 26.                                    | Derivation of themes           | Were themes identified in advance or derived from the data?                                                                                 | Page 4-5                                                         |
| 27.                                    | Software                       | What software, if applicable, was used to manage the data?                                                                                  | Page 4                                                           |
| 28.                                    | Participant checking           | Did participants provide feedback on the findings?                                                                                          | No, because we did not keep contact details of the participants. |
| Reporting                              |                                |                                                                                                                                             |                                                                  |
| 29.                                    | Quotations presented           | Were participant quotations presented to illustrate the themes / findings? Was each quotation identified?<br><i>e.g. participant number</i> | Page 6-12                                                        |
| 30.                                    | Data and findings consistent   | Was there consistency between the data presented and the findings?                                                                          | Page 4-5, 12-14                                                  |
| 31.                                    | Clarity of major themes        | Were major themes clearly presented in the findings?                                                                                        | Page 5-12                                                        |
| 32.                                    | Clarity of minor themes        | Is there a description of diverse cases or discussion of minor themes?                                                                      | Page 5-12                                                        |



# BMJ Open

## Measuring patient safety culture in maternal and child health institutions in China: a qualitative study

|                                 |                                                                                                                                                                                                                                                                                                                                                                                                             |
|---------------------------------|-------------------------------------------------------------------------------------------------------------------------------------------------------------------------------------------------------------------------------------------------------------------------------------------------------------------------------------------------------------------------------------------------------------|
| Journal:                        | <i>BMJ Open</i>                                                                                                                                                                                                                                                                                                                                                                                             |
| Manuscript ID                   | bmjopen-2016-015458.R2                                                                                                                                                                                                                                                                                                                                                                                      |
| Article Type:                   | Research                                                                                                                                                                                                                                                                                                                                                                                                    |
| Date Submitted by the Author:   | 22-May-2017                                                                                                                                                                                                                                                                                                                                                                                                 |
| Complete List of Authors:       | Wang, Yuanyuan; Peking University, School of Public Health; Peking University Third Hospital, Second Outpatient Department<br>Liu, Weiwei; Peking University Third Hospital, Second Outpatient Department<br>Shi, Huifeng; Peking University, School of Public Health<br>Liu, Chaojie; La Trobe University, School of Psychology and Public Health<br>Wang, Yan; Peking University, School of Public Health |
| <b>Primary Subject Heading</b>: | Health services research                                                                                                                                                                                                                                                                                                                                                                                    |
| Secondary Subject Heading:      | Qualitative research                                                                                                                                                                                                                                                                                                                                                                                        |
| Keywords:                       | Health & safety < HEALTH SERVICES ADMINISTRATION & MANAGEMENT, Organisation of health services < HEALTH SERVICES ADMINISTRATION & MANAGEMENT, QUALITATIVE RESEARCH                                                                                                                                                                                                                                          |
|                                 |                                                                                                                                                                                                                                                                                                                                                                                                             |

SCHOLARONE™  
Manuscripts

1  
2  
3 **Measuring patient safety culture in maternal and child health institutions in China: a qualitative**  
4 **study**  
5  
6

7 **Authors' names and affiliations:**

8 Yuanyuan Wang<sup>1,3</sup> (PhD, yyuanwang@163.com)

9 Weiwei Liu<sup>3</sup> (Prof. & MD, vivian\_liu@bjmu.edu.cn)

10 Huifeng Shi<sup>1</sup> (PhD, nsxm@pku.edu.cn)

11 Chaojie Liu<sup>2</sup> (Prof. & PhD, c.liu@latrobe.edu.au)

12 Yan Wang<sup>1</sup> (Prof. & DrPH, wangyan@bjmu.edu.cn)

13  
14  
15  
16 1. Peking University, School of Public Health, Department of Maternal and Child Health, Beijing, China

17 2. La Trobe University, School of Psychology and Public Health, Melbourne, Australia

18 3. Peking University Third Hospital, Second Outpatient Department, Beijing, China  
19

20  
21 Co-corresponding authors:

22 Professor Yan Wang, wangyan@bjmu.edu.cn and Professor Chaojie Liu, c.liu@latrobe.edu.au

23 As co-corresponding authors, Professor Yan Wang and Professor Chaojie Liu contributed equally to this  
24 study.  
25  
26  
27  
28  
29  
30  
31  
32  
33  
34  
35  
36  
37  
38  
39  
40  
41  
42  
43  
44  
45  
46  
47  
48  
49  
50  
51  
52  
53  
54  
55  
56  
57  
58  
59  
60

## ABSTRACT

**Introduction** Patient safety culture (PSC) plays a critical role in ensuring safe and quality care. Extensive PSC studies have been undertaken in hospitals. However, little is known about PSC in maternal and child health (MCH) institutions in China, which provide both population-based preventive services as well as individual care for patients.

**Objectives** This study aimed to develop a theoretical framework for conceptualizing PSC in MCH institutions in China.

**Methods** The study was undertaken in six MCH institutions (three in Hebei and three in Beijing). Participants (n=118) were recruited through stratified purposive sampling: 20 managers/administrators, 59 care providers and 39 patients. In-depth interviews were conducted with the participants. The interview data were coded using both inductive (based on the existing PSC theory developed by the Agency for Healthcare Research and Quality) and deductive (open coding arising from data) approaches. A PSC framework was formulated through axial coding that connected initial codes and selective coding that extracted a small number of themes.

**Results** The interviewees considered patient safety in relation to six aspects: safety and security in public spaces, safety of medical services, privacy and information security, financial security, psychological safety, and gap in services. A 12-dimensional PSC framework was developed, containing 69 items. While the existing PSC theory was confirmed by this study, some new themes emerged from the data. Patients expressed particular concerns about psychological safety and financial security. Defensive medical practices emerged as a PSC dimension that is associated with not only medical safety but also financial security and psychological safety. Patient engagement was also valued by the interviewees, especially the patients, as part of PSC.

**Conclusions** Although there are some common features in PSC across different healthcare delivery systems, PSC can also be context specific. In MCH settings in China, the meaning of “patient safety” goes beyond the traditional definition of patients. General wellbeing, health and disease prevention are important anchor points for defining PSC in such settings.

### Strengths and limitations of this study

- The study explored the concept of patient safety and PSC from the points of view of managers/administrators, care providers and patients.
- The study was conducted in MCH institutions, which provided population-based preventive services as well as individual care for patients.
- The results are context specific and caution should be taken when generalizing the results.
- The study provides a high level classification of patient safety, which should not be treated as an operational taxonomy to be used directly in practices.

## INTRODUCTION

Patient safety has become a global concern over the last two decades. It is agreed that patient safety culture (PSC), which is defined as the ‘shared values, beliefs, norms and procedures related to patient safety among members of the organization’,<sup>1</sup> is fundamental for safe and quality care.<sup>2-6</sup> In the literature, there are several distinct but related terms describing PSC, such as patient safety climate and patient safety attitudes. Culture is something that can be passed on and is relatively enduring.<sup>7</sup> It is reflected in normalized behaviors and practices. Climate, on the other hand, provides a snapshot of the overwhelming perceptions of people in regard to PSC.<sup>8,9</sup> Attitudes refer to how people see and

1  
2  
3 respond to matters associated with patient safety.<sup>10</sup> All of the three concepts are associated with safe  
4 behaviors, processes and outcomes.<sup>5 11-13</sup> The commonly accepted PSC elements cover a wide range of  
5 domains, including, but not limited to, leadership, communication, teamwork, error reporting,  
6 continuous learning, evidence-based practice, and non-punitive environment.<sup>14 15</sup>

7  
8 Maternal and child health (MCH) is a priority on the global development agenda, such as the  
9 sustainable development goals (SDGs) promoted by the United Nations.<sup>16</sup> China has achieved  
10 extraordinary success in MCH over the past few decades, thanks to the universal coverage of MCH  
11 care delivered by MCH institutions.<sup>17 18</sup> From 1990 to 2015, the maternal mortality ratio (MMR,  
12 maternal deaths per 100 000 live births) in China decreased from 114.2 to 17.7;<sup>19</sup> and under-five  
13 mortality rate (U5MR, deaths per 1000 live births) dropped from 55.9 to 12.3.<sup>20</sup> There are 3,071 MCH  
14 institutions in China, covering all counties and cities.<sup>21</sup> They are dedicated to providing four categories  
15 of MCH services: (1) maternal and obstetrical care such as premarital examinations, progestational  
16 consultations, and pregnancy, labor and postpartum services; (2) pediatric care including management  
17 of neonatal, infant and child growth and development, nutrition, mental health, as well as the  
18 diagnosis and treatment of childhood diseases; (3) women's health, ranging from adolescent health  
19 and reproduction to nutrition, mental health, breast care, menopause and aged care. Gynecological  
20 services are also provided; (4) family planning services, such as health education, preconception  
21 counseling, contraception, and reproductive healthcare services. The MCH institutions operate at  
22 provincial, municipal and county levels, forming a tiered comprehensive network.<sup>22</sup> A considerable  
23 number of policies and regulations have been devoted to strengthening the infrastructure,  
24 technologies, and procedures of MCH services.<sup>17 18 23</sup>

25  
26 Measuring PSC is important to help health workers to increase awareness and develop a better  
27 understanding of patient safety. It can also provide information support to managers to improve their  
28 managerial practices. Several PSC measurement tools have been developed. Of those tools, the  
29 Hospital Survey on Patient Safety Culture (HSPSC) developed by the Agency for Healthcare Research  
30 and Quality,<sup>24</sup> the Patient Safety Climate in Healthcare Organizations (PSCHO)<sup>25</sup> and the Safety  
31 Attitudes Questionnaire (SAQ)<sup>10</sup> are most commonly used. They have been applied to a wide range of  
32 health institutions in various countries,<sup>26-28</sup> including in China.<sup>29-33</sup> However, the Chinese versions of  
33 these instruments followed a stringent translation protocol and considered little, if any, of the special  
34 contexts of Chinese health institutions.

35  
36 This study aimed to explore the concept of patient safety and PSC in China's MCH institutions.  
37 Internationally, there is a dearth of literature that examines PSC in MCH institutions. Due to the  
38 unique features of MCH services, PSC components that need to be addressed in MCH institutions  
39 could be different from those in general hospitals.<sup>17 34</sup> Since culture has the nature of profundity and  
40 abstruseness,<sup>35</sup> it is essential to unveil its presentations and implications under specific contexts. The  
41 principles of qualitative research, in particular the grounded theory, fits well with the objectives of this  
42 study. It allows us to generate a new (or modified) PSC framework without necessarily being restricted  
43 to any existing theoretical framework.<sup>36 37</sup> Instead of presenting details of PSC, this study intended to  
44 provide a high level classification of patient safety and PSC for the MCH institutions in China.

## 53 METHODS

### 54 Design

55 This is a qualitative study conducted by a multidisciplinary research team, comprising experts in MCH  
56 (YYW [female], YW[female] and HS [male]), research methodology (CL [male]), and health services  
57  
58  
59  
60

1  
2  
3 management (CL [male]& WL [female]). In-depth interviews were undertaken with health workers  
4 (managers/administrators and care providers) and patients to examine their perceptions and  
5 experiences of patient safety and PSC.  
6  
7

### 8 **Setting and sample**

9 Data were collected between November 2014 and April 2015 in six MCH institutions: three in Hebei  
10 and three in Beijing. These institutions were purposively selected, considering diversities in staffing,  
11 resources (e.g. beds), and scope and volume of services (e.g. outpatient, inpatient and birth delivery).  
12 The number of beds in the participating MCH institutions ranged from 40 (at the county level) to 460  
13 (a large metropolitan center). Further details of the participating MCH institutions can be found in  
14 Appendix Table 1.  
15  
16

17 A stratified purposive sampling strategy was adopted to recruit participants. In each MCH institution,  
18 the potential participants were divided into 4-5 groups: management/administration (e.g., general  
19 office, medical administration, nursing administration, infection control), MCH clinics (e.g., pediatrics,  
20 gynecology, obstetrics), population health services (e.g., child healthcare, women's healthcare,  
21 preventive care), allied health services (e.g., pharmacy, imaging, laboratory) and other clinical services  
22 (e.g., internal medicine, surgery, dental, traditional Chinese medicine). In each institution, between  
23 2-5 managers/administrators, 7-12 care providers (including doctors, nurses, public health workers,  
24 midwives, and allied health professionals) and 5-8 patients (including caregivers of children) were  
25 invited to participate in the study. Three invited interviewees (1 doctor and 2 patients) withdrew due  
26 to disruption caused by other urgent matters. The final sample size was determined by the saturation  
27 of information when no new theme emerged from the coding. The saturation of information was  
28 deemed to be achieved when the entire research team (especially those who performed the  
29 interviews and coding) reached consensus. This resulted in a final sample size of 118, including 20  
30 managers/administrators (16.9%), 59 care providers (50.0%) and 39 patients (33.1%). The  
31 characteristics of participants are presented in Appendix Tables 2 and 3.  
32  
33  
34  
35  
36

### 37 **Data collection, processing and analyses**

38 This study used both inductive and deductive approaches in data collection, coding and analyses.  
39 While the inductive approach tested the fitness of data into the existing PSC theories, the deductive  
40 approach guided by the grounded theory allowed the researchers to keep mind open and generate  
41 new theories through the data.<sup>36</sup>  
42

43 The interview guides were developed based on a pre-tested tool in a previous study.<sup>38</sup> However, the  
44 interviewers were trained to respond to the interviewees in a flexible way in order to obtain in-depth  
45 information. They were encouraged to ask questions that were not listed in the interview guides. At  
46 the end of each interview session, the interviewers reviewed the interview guides to ensure that the  
47 interview had covered all the questions listed in the guides. No repeated interviews were undertaken.  
48 All interviews were conducted face-to-face in the MCH institutions, led by two chief investigators  
49 (YYW [female] and HS [male]) and assisted by three trained interviewers (with a master or PhD  
50 degree). Prior to each interview session, the interviewers introduced themselves and the purpose,  
51 contents, ethical principles and declarations of the study and obtained written informed consent from  
52 the participants. Each interview lasted 15-50 minutes and was audio-recorded. The interviewers also  
53 took notes on the environment of the interview, the body language of respondents, self-reflection,  
54 and any other information they thought necessary.  
55  
56  
57  
58  
59  
60

1  
2  
3 Data analyses took place concurrently with data collection. Interview strategies (including the  
4 questions asked) were adjusted in subsequent interviews. The research team met regularly, discussing  
5 the findings and determining whether additional samples were needed.

6  
7 All audio records were transcribed verbatim. We used NVivo 8.0 software to perform coding and  
8 analyses on the transcribed data and interview notes. The coding procedure followed the principles of  
9 grounded theory.<sup>36</sup> We started with open coding, which generated numerous codes from the raw data  
10 reflecting the panorama of the data. Original words were extracted to label the codes whenever it was  
11 possible. The second step involved axial coding. The initial codes were compared and condensed, with  
12 similar codes being merged using a new label that could describe all of the merged initial codes. The  
13 connections between different codes were identified by referring back to the raw data. This reduced  
14 the number of codes significantly. The third step was selective coding, which further abstracted key  
15 themes from the scattered codes. The selective coding considered the fitness of the condensed codes  
16 into the existing PSC theoretical framework developed by the Agency for Healthcare Research and  
17 Quality. Additional themes were established for those codes that did not fit well into the existing  
18 framework. Finally, we translated the codes into “dimensions” (high level framework) and “items”  
19 embedded in each dimension (Appendix Table 4).  
20  
21  
22  
23

#### 24 **Reliability and validity of coding**

25 All data were coded in parallel by two researchers (YYW [female] and HS [male]). This ensured the  
26 validity of coding.<sup>39 40</sup> First, both researchers developed their own initial codes from the data. They  
27 then shared and discussed their coding and agreed on an operational list of codes. The agreed  
28 operational list of codes was eventually used for coding all of the data by the two researchers  
29 independently. Finally, another round of coding discussion was held, with modifications being made to  
30 the operational codes and the coding of all of the data into the final list of codes. The coding process is  
31 illustrated in Appendix Figure 1.

32  
33 The reliability of coding was tested through repeated coding.<sup>41 42</sup> About 10% (n=12) of interview  
34 records were randomly selected for repeated coding: 2 from managers/administrators, 6 from care  
35 providers, and 4 from patients. Two researchers recoded the data independently into the agreed  
36 operational list of codes. About 63.3% to 100% of the codes were consistent between the two  
37 researchers. The two researchers then discussed and reached a consensus on the final coding, which  
38 was compared with the coding done in the full data analyses. The percentage of agreement (=number  
39 of codes agreed upon / total number of codes \* 100% for each interview record) in repeated coding  
40 ranged from 62.2% to 82.5% (Appendix Table 5).

41  
42 We did not seek feedback from the interviewees on the transcripts and coding due to a lack of contact  
43 details.  
44  
45  
46  
47

## 48 **RESULTS**

### 49 **What is patient safety?**

50 In the MCH setting, the concept of patient safety was linked to unwanted health outcomes, not  
51 necessarily adverse events as a result of medical interventions. The interviewees were concerned  
52 about both adverse events and the shortage of good outcomes.

53  
54 Patient safety was categorized into six aspects (Table 1): safety and security of public spaces (e.g., falls,  
55 fire, property loss and damage), safety of medical services (through the entire process), privacy and  
56 information security, financial security, psychological safety, and gap in services. Managers and care  
57  
58  
59  
60

1  
2  
3 providers were more likely to highlight the safety of medical services (65.0% and 52.5%, respectively)  
4 and the safety and security of public spaces (55.0% and 35.6%, respectively) as a major concern in  
5 patient safety. By contrast, patients (53.8%) wanted more on assurance of safety or avoided events  
6 (psychological safety). They (38.5%) also believed that unnecessary interventions could lower their  
7 financial security, jeopardizing their ability to pay for necessary interventions. While excessive  
8 interventions might be associated with adverse events, a lack of necessary interventions might be  
9 associated with negative consequences that could otherwise be avoided. Concerns about privacy and  
10 information security were shared by both health workers and patients, albeit a small percentage (25.0%  
11 by managers/administrators, 5.1% by care providers and 2.6% by patients).

12  
13  
14 *'Illness is a painful and stressful experience... I hope doctors or nurses alleviate my anxieties*  
15 *and doubts with their professional answers and psychological support.'*(Patient)

16  
17 *'I often encounter patients suffering from postnatal depression, with all kinds of worries and*  
18 *fears... It may be more effective to comfort them psychologically, even offering a hug or*  
19 *slightly tough love, to make patients feel better rather than to prescribe drugs.'*(Provider)

20  
21 *'Some doctors like to prescribe lots of pills, infusions and examinations, whether or not they*  
22 *should, just to make a profit.'* (Patient)

23  
24 *'Take this laboratory report (in his hand) as an example. I would not feel safe if I did not*  
25 *listen to the doctor's advice to take such a test. My doctors read it and then told me, 'it is*  
26 *okay, and there is nothing to be worried about'. I felt safe at once, no matter whether it was*  
27 *necessary to do it or how much money I paid.'* (Patient)

1  
2  
3  
4  
5  
6  
7  
8  
9  
10  
11  
12  
13  
14  
15  
16  
17  
18  
19  
20  
21  
22  
23  
24  
25  
26  
27  
28  
29  
30  
31  
32  
33  
34  
35  
36  
37  
38  
39  
40  
41  
42  
43  
44  
45  
46  
47  
48  
49

**Table 1 Number (percentage) of codes associated with patient safety in MCH institutions**

| Code                                   | Descriptions                                                                                          | Health workers(n1=79) |                        | Patients (n4=39) | Total (N=118) |
|----------------------------------------|-------------------------------------------------------------------------------------------------------|-----------------------|------------------------|------------------|---------------|
|                                        |                                                                                                       | Managers (n2=20)      | Care providers (n3=59) |                  |               |
| 1.Safety and security of public spaces | Incidents that happen in public spaces, e.g., falls, fires, property loss and damage                  | 11(55.0%)             | 21(35.6%)              | 5(12.8%)         | 37(31.4%)     |
| 2. Safety of medical services          | Errors in diagnostic and treatment procedures; unintended outcomes                                    | 13(65.0%)             | 31(52.5%)              | 9(23.1%)         | 53(44.9%)     |
| 3. Privacy and information security    | Violation of privacy and disclosure of information                                                    | 5(25.0%)              | 3( 5.1%)               | 1( 2.6%)         | 9( 7.6%)      |
| 4. Financial security                  | Financial waste in unnecessary interventions and a lack of ability to pay for necessary interventions | 6(30.0%)              | 6(10.2%)               | 15(38.5%)        | 27(22.9%)     |
| 5. Psychological safety                | Worry or anxiety associated with unknown events                                                       | 5(25.0%)              | 10(16.9%)              | 21(53.8%)        | 36(30.5%)     |
| 6. Gap in services                     | Gap between expectations and reality                                                                  | 6(30.0%)              | 12(20.3%)              | 6(15.4%)         | 24(20.3%)     |



### Patient safety culture (PSC)

Corresponding to the conceptualization of patient safety, 12 dimensions (containing 69 items) emerged as key components of PSC: management support (6 items), regulations and procedures (6 items), staffing (3 items), teamwork (5 items), non-punitive response to adverse events (6 items), openness in communication (8 items), risk awareness (6 items), continuous learning (6 items), self-efficacy (5 items), defensive medical practices (4 items), patient engagement (6 items), and competing interest between public health and clinical services (8 items). Details on the PSC dimensions and items can be found in Appendix Table 4.

Different views were found between health workers and patients. The top 5 most frequently coded dimensions from the data were: self-efficacy (100.0%), management support (95.0%), regulations and procedures (95.0%), continuous learning (95.0%) and non-punitive response to adverse events (85.0%) for managers; continuous learning (93.2%), self-efficacy (91.5%), regulations and procedures (91.5%), management support (89.8%), and staffing (88.1%) for care providers; and self-efficacy (94.9%), patient engagement (87.2%), continuous learning (51.3%), management support (43.6%), and staffing (41.0%) for patients. It was common to blame individuals for medical errors across all three groups of interviewees.

*'We have summarized the common causes of medical incidents, including poor communication, lack of knowledge and skills, not obeying guidelines and procedures, and so on. All of these causes are individual responsibilities. Punishment of departments or individuals, although sometimes attracts complains, is helpful for reducing the number of incidents and making rules and regulations work.'* (Manager)

*'A person who makes mistakes often is incompetent and should be fired.'* (Manager)

*'Punishment of individuals is fair to others who do not make mistakes.'* (Provider)

*'Medical errors and incidents are associated with personal attitudes and skills.'* (Patient)

The 12-dimensional framework for PSC confirmed the existing theoretical framework developed by the Agency for Healthcare Research and Quality. However, some new themes emerged.

Patients demanded more involvement in decision making, whether it was in relation to planning and prevention or medical procedures. They advocated for patient rights. This component of PSC was supposed to address the "gap between expectations and reality". It also reflected the nature of MCH, a kind of service comprising both preventive and clinical care.

*'Now young parents are well educated and usually learn relevant information on the Internet before seeking care for their babies; they would like more detailed and accurate explanations than before.'*(Provider)

*'Communication is very important. No matter what the conditions or risks, patients must be completely informed.'*(Patient)

Defensive medical practices emerged as another important component of PSC. Defensive practices could be presented in multiple ways, for example: rejection of a patient with high risks (risk aversion); compromised clinical decision in response to irrational requests from patients; unnecessary interventions to show "obligations" that could favor health workers in disputes. Such practices eroded the trust between health providers and patients and would eventually bring harm to patients.

*'If a pregnant woman refuses to take a prenatal blood test, we suggest that our doctors write it down in her medical records, which would provide evidence in a dispute over a case*

1  
2  
3 *of anemia.’ (Manager)*

4 *‘I refer premature infants to higher level hospitals as much as possible to prevent*  
5 *unexpected complications I cannot afford.’ (Provider)*

6  
7 *‘Doctors rely on machines too much because they don’t want to take any risks.’ (Patient)*  
8

9  
10 There was competing interest between public health and clinical services in MCH institutions. Some  
11 health workers believed that managers might make clinical services a priority in the institution due to  
12 financial pressures. This was likely to divert much needed resources from public health services to  
13 clinical care, increasing the possibility of the occurrence of avoidable events.  
14  
15  
16  
17  
18  
19  
20  
21  
22  
23  
24  
25  
26  
27  
28  
29  
30  
31  
32  
33  
34  
35  
36  
37  
38  
39  
40  
41  
42  
43  
44  
45  
46  
47  
48  
49  
50  
51  
52  
53  
54  
55  
56  
57  
58  
59  
60

Table 2 Number (percentage) of codes associated with the 12 dimensions of patient safety culture in MCH institutions

| Dimension                                                          | Description of dimension                                                                    | Health workers (n1=79) |                        | Patients (n4=39) | Total (N=118) |
|--------------------------------------------------------------------|---------------------------------------------------------------------------------------------|------------------------|------------------------|------------------|---------------|
|                                                                    |                                                                                             | Managers (n2=20)       | Care providers (n3=59) |                  |               |
| 1. Management support                                              | Prioritize patient safety; good management practices                                        | 19(95.0%)              | 53(89.8%)              | 17(43.6%)        | 89(75.4%)     |
| 2.Regulations and procedures                                       | Rational and adjustable regulations and policies, empowering health workers                 | 19(95.0%)              | 54(91.5%)              | 13(33.3%)        | 86(72.9%)     |
| 3.Staffing                                                         | Staffing and workloads                                                                      | 16(80.0%)              | 52(88.1%)              | 16(41.0%)        | 84(71.2%)     |
| 4.Teamwork                                                         | Teamwork within departments, across departments and across institutions                     | 13(65.0%)              | 47(79.7%)              | 5(12.8%)         | 65(55.1%)     |
| 5.Non-punitive response to adverse events                          | Non-punitive response to adverse events based on root cause analyses; feedback and learning | 17(85.0%)              | 42(71.2%)              | 6(15.4%)         | 65(55.1%)     |
| 6.Openness in communication                                        | Adverse event reporting; open communication with colleagues and patients                    | 10(50.0%)              | 38(64.4%)              | 0( 0.0%)         | 48(40.7%)     |
| 7.Risk awareness                                                   | Attitudes toward and awareness of medical risks, errors and potential flaws                 | 15(75.0%)              | 44(74.6%)              | 13(33.3%)        | 72(61.0%)     |
| 8.Continuous learning                                              | Continuous learning and training, not limited to knowledge and skills                       | 19(95.0%)              | 55(93.2%)              | 20(51.3%)        | 94(79.7%)     |
| 9. Self-efficacy                                                   | Individual belief in one's ability to succeed in tasks                                      | 20(100.0%)             | 54(91.5%)              | 37(94.9%)        | 111(94.1%)    |
| 10.Defensive medical practices                                     | Procedures serving for the purpose of self-defense in disputes                              | 9(45.0%)               | 22(37.3%)              | 9(23.1%)         | 40(33.9%)     |
| 11.Patient engagement                                              | Patient involvements in decision making                                                     | 15(75.0%)              | 44(74.6%)              | 34(87.2%)        | 93(78.8%)     |
| 12. Competing interest between public health and clinical services | Priority setting and resource allocation between public health and clinical services        | 6(30.0%)               | 6(10.2%)               | 0( 0.0%)         | 12(10.2%)     |

### External factors associated with PSC

PSC can be shaped by some external factors. In this study, the interviewees identified policy and social environments, poor health literacy of consumers, and a lack of trust between patients and health workers as major factors influencing PSC in MCH institutions.

MHC institutions are subject to strict policy and regulatory rules. Some unintended consequences had arisen from this strong control. For example, staffing and personnel policies led to a shortage of staff and heavy workloads of health workers; insufficient government financial support limited the further development of MCH institutions, resulting in the profit-seeking behaviors of these institutions; MCH institutions at the county level had restricted access to a limited range of medicines. These policy arrangements had the potential to jeopardize patient safety and PSC.

*'For social stability purposes, hospitals are always compelled to compensate medical dispute profiteers, regardless of who is wrong.'* (Manager)

*'The government usually emphasizes the importance of public health in words but not in actions. Because of a lack of funds, public health tasks are always done as little as possible in fact.'* (Manager)

*'Since the institutional reforms in our region, county-level MCH institutions are not allowed to supply some drugs and services anymore, which is a broad-brush approach that does not consider specific circumstances.'* (Provider)

The public media played a significant role in shaping the opinions of consumers. The large amount of unverified or exaggerated reports about medical incidents were blamed by the interviewees for causing distrust and conflicts between patients and health providers, fueling the defensive practices of health workers.

*'Our medical staff is overloaded and the medical industry is at high risk. However, patients cannot understand these things, and medical accidents are reported by the mass media in a way that is always misleading and misinterpreted.'* (Manager)

*'Medical disputes probably happen in all hospitals. Doubts about the whole industry have spread into society. Additionally, a small thing can be magnified by the media and aggravate distrust.'* (Provider)

Health care is a co-production process in which patients play a critical role. Poor health literacy limited the ability of patients to engage in patient safety management. The interviewees reported that some patients felt ashamed of their illness (especially female patients), some treated health care as a simple financial transaction of services, some doubted the intention of medical decisions, some held unreasonable expectations of medicines and had a low appreciation of preventive care, some simply disengaged, some misunderstood medical advice and failed to cooperate with health workers. There was a low level of recognition of the inherent inevitability of making mistakes by human beings.

*'People don't respect us. For example, some nurses have been physically attacked by parents for failing to insert the scalp needle on the first try.'* (Manager)

*'Some patients consider treating human bodies to be like repairing machines. You must ensure that they get better or they will make trouble for you.'* (Provider)

*'I couldn't understand the doctors perfectly, and I had to do what they told me.'* (Patient)

The lack of trust led patients to believe that they had to choose health workers in order to ensure

1  
2  
3 safety. Accreditation, environments and the popularity of health facilities, and the professional title  
4 and qualifications of health workers could all serve for the purpose of provider selection. This  
5 information either came from their previous experiences or from sharing with others. Unfortunately,  
6 patients with a low income had to take into consideration the costs, compromising their choice of  
7 providers. The medical-seeking behaviors (Figure 1) of patients had a great influence on PSC. In some  
8 cases, patients might challenge doctors using a second opinion obtained from other providers, peers  
9 or even the Internet.

10  
11 *'Some patients did not trust us. They would see several doctors for verification.'* (Provider)

12  
13 *'I choose this hospital because it is big hospital with a good environment and many people  
14 come here seeking MCH services.'* (Patient)

15  
16 *'I trust my doctor because one of my friends is acquainted with him.'* (Patient)

17  
18 *'Before making the decision to give birth here, we read nearly all the comments about this  
19 hospital on the internet.'* (Patient)

## 20 21 22 **DISCUSSION**

### 23 **An expanded definition of patient safety**

24 In the context of MCH institutions in China, the concept of patient safety goes beyond the scope of  
25 the definition provided by the World Health Organization (WHO): 'the reduction of risk of unnecessary  
26 harm (impairment of structure or function of the body and/or any deleterious effect arising there  
27 from) associated with health care to an acceptable minimum'.<sup>43</sup> Patient safety is no longer limited to  
28 service-associated adverse events. The absence or shortage of the wanted services became a safety  
29 concern because it can also lead to potential harm to patients. Patients often seek services from MCH  
30 institutions for the assurance of safety. Studies show that psychological safety assurance is to some  
31 extent related to distrustful relationships between patients and providers and inadequate informed  
32 consent.<sup>44 45</sup>

33  
34 Patient safety problems are not necessarily a result of medical errors. In this study, our interviewees  
35 expressed concerns about the environmental impacts on patient safety, such as the safety and  
36 security of public spaces. In resource-poor countries where consumers have to pay a large proportion  
37 of medical expenses out of pocket, patient safety can be jeopardized by a lack of financial security.  
38 Spending on unnecessary interventions may not only result in direct harm, it may also prevent  
39 patients from receiving much needed interventions.<sup>46 47</sup> Some other studies also expanded the  
40 definition of patient safety, although from quite a different angle.<sup>48-50</sup>

### 41 **Special characteristics of PSC in MCH institutions**

42 MCH institutions possess some unique characteristics which differentiate them from general hospitals.  
43 Service users in MCH institutions are predominantly women and children. They are usually  
44 disadvantaged with low socioeconomic status, and face significant barriers in engaging with  
45 healthcare decisions and getting access to medical services.<sup>51</sup> MCH services are focused on a special  
46 window of the life cycle (childhood, adolescence and reproduction) and their customers are usually  
47 healthy. They are more likely to experience a higher level of stress when things go wrong compared to  
48 those in illness conditions. MCH institutions in China are considered part of the public health system.  
49 They are obliged to place population health as a priority and work in partnership with various  
50 stakeholders.<sup>22</sup>

51  
52 Nine of the 12 dimensions resemble those identified in other PSC studies.<sup>10 24 25 52</sup> These are

1  
2  
3 management support, regulations and procedures, staffing, teamwork, non-punitive response to  
4 adverse events, openness in communication, risk awareness, continuous learning and self-efficacy.  
5 The three additional dimensions identified in this study are: patient engagement, defensive medical  
6 practices, and competing interest between public health and individual care. Patient engagement has  
7 recently attracted increasing attention from the international community.<sup>53-55</sup> Defensive medical  
8 practices, although not always harmful, have switched the core value to the interest of care providers.  
9 Evidence shows that defensive practices often involve excessive and sometimes harmful interventions,  
10 exacerbating distrust and poor cooperation between patients and care providers.<sup>56-58</sup> A profit-driven  
11 management culture often favors clinical interventions and disease treatment, leaving public health  
12 under-resourced, which will eventually lead to consequences in patient safety.<sup>46 47</sup>  
13 Similar to findings of other studies,<sup>43 59 60</sup> both health workers and patients emphasized the  
14 importance of individual competency and tended to endorse a punitive strategy for improving patient  
15 safety, for improving patient safety. This runs in counter with a systems strategy, which places a strong  
16 emphasis on 'upstream' systemic factors.<sup>43</sup> Although it is fundamental to address system flaws for  
17 achieving sustainable safety outcomes,<sup>61 62</sup> blaming individuals is often emotionally more satisfying.<sup>43</sup>  
18  
19  
20  
21  
22  
23  
24  
25  
26  
27  
28  
29  
30  
31  
32  
33  
34  
35  
36  
37  
38  
39  
40  
41  
42  
43  
44  
45  
46  
47  
48  
49  
50  
51  
52  
53  
54  
55  
56  
57  
58  
59  
60

### Challenges for nurturing PSC

The concept of PSC reflects the philosophy of patient-centered health care. In reality, however, the concerns of health workers may not always be aligned with those of the patients. There may exist cognitive conflicts and interest conflicts between health workers and patients. This study involved managers, care providers and patients as participants. We found that patients are more likely to focus on financial security, psychological safety assurance, and engagement in decision making; whereas, health workers are more concerned about the organization of technical services. This may impose serious barriers for health workers to communicate with patients effectively and involve patients in clinical decisions in a meaningful way. Interest conflicts between patients and providers make the situation even worse, fueling defensive behaviors from both sides. Cognitive and interest conflicts threaten mutual understanding, trust and cooperation between patients and health workers, and thereby damage the safety and quality of patient care.<sup>64-68</sup>

Poor PSC can also be shaped by broad policy and social environments. Health workers have to consider the interests of their employers and follow policy and regulatory requirements. Over the past few decades, MCH institutions in China have been exposed to intense market competitions. The low salary and high bonus system encourages health workers to increase services, but sometimes at the cost of sacrificing patient interests. The distrust of patients in health services is prevalent. In extreme cases, this has been transformed into medical violence. The legal system and the public media have played a small role, if at all, in the improvement of social environments.<sup>69-74</sup>

### Limitations and further studies

This study was conducted in six MCH institutions and the results are context specific. Caution needs to be taken in relation to the generalization of the results. The study provides a high-level classification of patient safety, which should not be treated as an operational taxonomy to be used directly in practices.

The PSC framework was developed through a qualitative study. Further studies are needed to quantify the reliability and validity of the instrument. There is also a need to verify the association between

1  
2  
3 PSC and patient care outcomes.  
4

5  
6 **Conclusion**

7 This study developed a 12-dimensional framework for PSC in MCH institutions in China. Despite  
8 general similarities between this instrument and existing instruments measuring PSC in hospitals,  
9 there are some features which are specific to MCH institutions. Three additional dimensions (patient  
10 engagement, defensive medical practices, and competing interest between public health and  
11 individual care) are included. The focus of our instrument is more about “health” rather than  
12 “diseases”. Adverse events arising from MCH services as well as health consequences as a result of the  
13 absence of needed services (e.g. preventive care) are considered equally important in relation to  
14 patient safety.  
15  
16

17  
18 **Acknowledgements** The authors wish to acknowledge the contributions of the National Center for  
19 Women and Children’s Health and the six MCH institutions for supporting the field work. We thank all  
20 of the interviewers and interviewees, and those who offered help with this study.  
21  
22

23 **Authors’ Contributions** YYW and YW conceived and designed the study and oversaw the data  
24 collection. CL and WL participated in the design of the study and the development of the interview  
25 tools. HS participated in data collection and analyses. YYW led the data analyses and writing of the  
26 manuscript. CL guided the development research methodology and interpretation of the findings. As  
27 co-corresponding authors, YW and CL contributed equally to this study. All authors contributed to the  
28 drafting of the article and read and approved the final version of the manuscript.  
29  
30  
31

32 **Funding** This study was funded by Beijing Municipal Education Commission, Beijing Key Disciplines  
33 (Maternal, Child and Adolescent Health).  
34  
35

36 **Competing interests** None declared.  
37

38 **Ethics approval** This study protocol was approved by the Peking University Institutional Review Board  
39 and Peking University Third Hospital Medical Science Research Ethics Committee.  
40  
41

42 **Data Sharing Statement** The raw data supporting the conclusions of this article are included in the  
43 article as interview excerpts. The full interview transcripts remain the property of the Division of  
44 Maternal and Child Health, School of Public Health, Peking University, which are accessible by  
45 contacting the corresponding author Prof. Yan Wang, email: wangyan@bjmu.edu.cn  
46  
47  
48  
49  
50  
51  
52  
53  
54  
55  
56  
57  
58  
59  
60

## REFERENCES

1. Weaver SJ, Lubomksi LH, Wilson RF, et al. Promoting a culture of safety as a patient safety strategy: a systematic review. *Ann Intern Med* 2013;**158**(5 Pt 2):369-74.
2. Kristensen S, Christensen KB, Jaquet A, et al. Strengthening leadership as a catalyst for enhanced patient safety culture: a repeated cross-sectional experimental study. *BMJ Open* 2016;**6**(5):e010180.
3. Azami-Aghdash S, Ebadifard Azar F, Rezapour A, et al. Patient safety culture in hospitals of Iran: a systematic review and meta-analysis. *Med J Islam Repub Iran* 2015;**29**:251.
4. Azer SA, Baharoon S. Medical error reporting: is it about physicians' knowledge and their practice, or patient safety culture in the workplace? *East Mediterr Health J* 2016;**22**(3):228-9.
5. Verbakel NJ, Langelaan M, Verheij TJ, et al. Effects of patient safety culture interventions on incident reporting in general practice: a cluster randomised trial. *Br J Gen Pract* 2015;**65**(634):e319-29.
6. Bishop AC, Cregan BR. Patient safety culture: finding meaning in patient experiences. *Int J Health Care Qual Assur* 2015;**28**(6):595-610.
7. McKeown C. Patient safety culture: theory, methods & application. *Ergonomics* 2016;**59**(8):1132-3.
8. Singer SJ, Vogus TJ. Safety climate research: taking stock and looking forward. *BMJ Qual Saf* 2013;**22**(1):1-4.
9. Halligan M, Zecevic A. Safety culture in healthcare: a review of concepts, dimensions, measures and progress. *BMJ Qual Saf* 2011;**20**(4):338-43.
10. Sexton JB, Helmreich RL, Neilands TB, et al. The Safety Attitudes Questionnaire: psychometric properties, benchmarking data, and emerging research. *BMC Health Serv Res* 2006;**6**:44.
11. El-Jardali F, Dimassi H, Jamal D, et al. Predictors and outcomes of patient safety culture in hospitals. *BMC Health Serv Res* 2011;**11**:45.
12. Singer S, Lin S, Falwell A, et al. Relationship of safety climate and safety performance in hospitals. *Health Serv Res* 2009;**44**(2 Pt 1):399-421.
13. Hill MR, Roberts MJ, Alderson ML, et al. Safety culture and the 5 steps to safer surgery: an intervention study. *Br J Anaesth* 2015;**114**(6):958-62.
14. Xuanyue M, Yanli N, Hao C, et al. Literature review regarding patient safety culture. *J Evid Based Med* 2013;**6**(1):43-9.
15. Sammer CE, Lykens K, Singh KP, et al. What is patient safety culture? A review of the literature. *J Nurs Scholarsh* 2010;**42**(2):156-65.
16. Health - United Nations Sustainable Development 2017 [Available from: <http://www.un.org/sustainabledevelopment/health/>].
17. Guo Y, Bai J, Na H. The history of China's maternal and child health care development. *Semin Fetal Neonatal Med* 2015;**20**(5):309-14.
18. Ren Z, Song P, Theodoratou E, et al. China's human resources for maternal and child health: a national sampling survey. *BMC Health Serv Res* 2015;**15**:561.
19. Collaborators GMM. Global, regional, and national levels of maternal mortality, 1990-2015: a systematic analysis for the Global Burden of Disease Study 2015. *Lancet* 2016;**388**(10053):1775-812.
20. Collaborators GCM. Global, regional, national, and selected subnational levels of stillbirths, neonatal, infant, and under-5 mortality, 1980-2015: a systematic analysis for the Global Burden of Disease Study 2015. *Lancet* 2016;**388**(10053):1725-74.



- 1  
2  
3 21. The number of medical and health institutions in the country by the end of June 2016 - National  
4 Health and Family Planning Commission of the People's Republic of China 2016 [Available  
5 from:  
6 [http://www.nhfpc.gov.cn/mohwsbwstjxxzx/s7967/201608/87343c7d63ce41ca8d8fddf7a5db](http://www.nhfpc.gov.cn/mohwsbwstjxxzx/s7967/201608/87343c7d63ce41ca8d8fddf7a5db66b7.shtml)  
7 [66b7.shtml](http://www.nhfpc.gov.cn/mohwsbwstjxxzx/s7967/201608/87343c7d63ce41ca8d8fddf7a5db66b7.shtml).  
8
- 9  
10 22. Guidance on standardized organizational construction and management of maternal and child  
11 health service institutions - National Health and Family Planning Commission of the People's  
12 Republic of China 2016 [Available from:  
13 <http://www.nhfpc.gov.cn/fys/s3581/201512/a0dcaf1f20624769a9a3b2dafa0280ab.shtml>.  
14
- 15 23. Feng XL, Theodoratou E, Liu L, et al. Social, economic, political and health system and program  
16 determinants of child mortality reduction in China between 1990 and 2006: A systematic  
17 analysis. *J Glob Health* 2012;**2**(1):010405.
- 18 24. Wagner C, Smits M, Sorra J, et al. Assessing patient safety culture in hospitals across countries. *Int*  
19 *J Qual Health Care* 2013;**25**(3):213-21.
- 20 25. Singer SJ, Gaba DM, Geppert JJ, et al. The culture of safety: results of an organization-wide survey  
21 in 15 California hospitals. *Qual Saf Health Care* 2003;**12**(2):112-8.
- 22 26. Quillivan RR, Burlison JD, Browne EK, et al. Patient Safety Culture and the Second Victim  
23 Phenomenon: Connecting Culture to Staff Distress in Nurses. *Jt Comm J Qual Patient Saf*  
24 2016;**42**(8):377-86.
- 25 27. Hoffmann B, Miessner C, Albay Z, et al. Impact of individual and team features of patient safety  
26 climate: a survey in family practices. *Ann Fam Med* 2013;**11**(4):355-62.
- 27 28. Nguyen G, Gambashidze N, Ilyas SA, et al. Validation of the safety attitudes questionnaire (short  
28 form 2006) in Italian in hospitals in the northeast of Italy. *BMC Health Serv Res* 2015;**15**:284.
- 29 29. Chen IC, Li HH. Measuring patient safety culture in Taiwan using the Hospital Survey on Patient  
30 Safety Culture (HSOPSC). *BMC Health Serv Res* 2010;**10**:152.
- 31 30. Nie Y, Mao X, Cui H, et al. Hospital survey on patient safety culture in China. *BMC Health Serv Res*  
32 2013;**13**:228.
- 33 31. Zhu J, Li L, Zhao H, et al. Development of a patient safety climate survey for Chinese hospitals:  
34 cross-national adaptation and psychometric evaluation. *BMJ Qual Saf* 2014;**23**(10):847-56.
- 35 32. Zhou P, Bundorf MK, Gu J, et al. Survey on patient safety climate in public hospitals in China. *BMC*  
36 *Health Serv Res* 2015;**15**:53.
- 37 33. GUO X ZW. Revision of Safety Attitudes Questionnaire and ... *Chinese Journal of Nursing Education*  
38 2010(04):151-54.
- 39 34. Yan X, Dai Z, Hu D. Measuring Patient Safety Culture in Women Healthcare Hospital by Using the  
40 Hospital Survey on Patient Safety Culture. *Chinese Health Quality Management*  
41 2013;**20**(6):75-78.
- 42 35. Nieva VF, Sorra J. Safety culture assessment: a tool for improving patient safety in healthcare  
43 organizations. *Qual Saf Health Care* 2003;**12 Suppl 2**:ii17-23.
- 44 36. Charmaz K. *Constructing grounded theory*. 2nd edition ed. London ; Thousand Oaks, Calif.: Sage,  
45 2014.
- 46 37. Foley G, Timonen V. Using Grounded Theory Method to Capture and Analyze Health Care  
47 Experiences. *Health Serv Res* 2015;**50**(4):1195-210.
- 48 38. Liu C, Liu W, Wang Y, et al. Patient safety culture in China: a case study in an outpatient setting in  
49 Beijing. *BMJ Qual Saf* 2014;**23**(7):556-64.  
50  
51  
52  
53  
54  
55  
56  
57  
58  
59  
60

39. Dovey SM, Meyers DS, Phillips RL, et al. A preliminary taxonomy of medical errors in family practice. *Qual Saf Health Care* 2002;**11**(3):233-8.
40. Clayman ML, Makoul G, Harper MM, et al. Development of a shared decision making coding system for analysis of patient-healthcare provider encounters. *Patient Educ Couns* 2012;**88**(3):367-72.
41. Kirilenko AP, Stepchenkova S. Inter-Coder Agreement in One-to-Many Classification: Fuzzy Kappa. *PLoS One* 2016;**11**(3):e0149787.
42. Bottle A, Jarman B, Aylin P. Hospital standardized mortality ratios: sensitivity analyses on the impact of coding. *Health Serv Res* 2011;**46**(6pt1):1741-61.
43. World Health Organization., WHO Patient Safety. *Patient safety curriculum guide: multi-professional edition*. Geneva: World Health Organization, 2011.
44. Duckett J, Hunt K, Munro N, et al. Does distrust in providers affect health-care utilization in China? *Health Policy Plan* 2016;**31**(8):1001-9.
45. Narveson J. Comment on Levy's 'Forced to be free? Increasing patient autonomy by constraining it'. *J Med Ethics* 2014;**40**(5):302-3.
46. McGregor MJ, Cohen M, Stocks-Rankin CR, et al. Complaints in for-profit, non-profit and public nursing homes in two Canadian provinces. *Open Med* 2011;**5**(4):e183-92.
47. Comondore VR, Devereaux PJ, Zhou Q, et al. Quality of care in for-profit and not-for-profit nursing homes: systematic review and meta-analysis. *BMJ* 2009;**339**:b2732.
48. Klemp K, Dovey S, Valderas JM, et al. Developing a patient safety incident classification system for primary care. A literature review and Delphi-survey by the LINNEAUS collaboration on patient safety in primary care. *Eur J Gen Pract* 2015;**21** Suppl:35-8.
49. Keriél-Gascou M, Bami J, Chanière M, et al. [Which definition and taxonomy of incident to use for a French reporting system in primary care settings?]. *Rev Epidemiol Sante Publique* 2014;**62**(1):41-52.
50. Mikkelsen KL, Thommesen J, Andersen HB. Validating the Danish adaptation of the World Health Organization's International Classification for Patient Safety classification of patient safety incident types. *Int J Qual Health Care* 2013;**25**(2):132-40.
51. Sustainable Development Goals (SDGs): World Health Organization; 2017 [updated 2017-04-11 02:38:11. Available from: <http://www.who.int/sdg/en/>].
52. Parker D. Managing risk in healthcare: understanding your safety culture using the Manchester Patient Safety Framework (MaPSaF). *J Nurs Manag* 2009;**17**(2):218-22.
53. Davis RE, Jacklin R, Sevdalis N, et al. Patient involvement in patient safety: what factors influence patient participation and engagement? *Health Expect* 2007;**10**(3):259-67.
54. Sahlström M, Partanen P, Rathert C, et al. Patient participation in patient safety still missing: Patient safety experts' views. *Int J Nurs Pract* 2016;**22**(5):461-69.
55. Vaismoradi M, Jordan S, Kangasniemi M. Patient participation in patient safety and nursing input - a systematic review. *J Clin Nurs* 2015;**24**(5-6):627-39.
56. Deng W, Klemetti R, Long Q, et al. Cesarean section in Shanghai: women's or healthcare provider's preferences? *BMC Pregnancy Childbirth* 2014;**14**:285.
57. Renkema E, Broekhuis M, Ahaus K. Conditions that influence the impact of malpractice litigation risk on physicians' behavior regarding patient safety. *BMC Health Serv Res* 2014;**14**:38.
58. Ortashi O, Virdee J, Hassan R, et al. The practice of defensive medicine among hospital doctors in the United Kingdom. *BMC Med Ethics* 2013;**14**:42.

- 1
  - 2
  - 3
  - 4
  - 5
  - 6
  - 7
  - 8
  - 9
  - 10
  - 11
  - 12
  - 13
  - 14
  - 15
  - 16
  - 17
  - 18
  - 19
  - 20
  - 21
  - 22
  - 23
  - 24
  - 25
  - 26
  - 27
  - 28
  - 29
  - 30
  - 31
  - 32
  - 33
  - 34
  - 35
  - 36
  - 37
  - 38
  - 39
  - 40
  - 41
  - 42
  - 43
  - 44
  - 45
  - 46
  - 47
  - 48
  - 49
  - 50
  - 51
  - 52
  - 53
  - 54
  - 55
  - 56
  - 57
  - 58
  - 59
  - 60
59. Reason J. Human error: models and management. *BMJ* 2000;**320**(7237):768-70.
60. Reason J. Safety in the operating theatre - Part 2: human error and organisational failure. *Qual Saf Health Care* 2005;**14**(1):56-60.
61. Charles R, Hood B, Derosier JM, et al. How to perform a root cause analysis for workup and future prevention of medical errors: a review. *Patient Saf Surg* 2016;**10**:20.
62. Holdsworth MT, Bond R, Parikh S, et al. Root Cause Analysis Design and Its Application to Pharmacy Education. *Am J Pharm Educ* 2015;**79**(7):99.
63. Reason J. Beyond the organisational accident: the need for "error wisdom" on the frontline. *Qual Saf Health Care* 2004;**13 Suppl 2**:ii28-33.
64. Van Bogaert P, Peremans L, Diltour N, et al. Staff Nurses' Perceptions and Experiences about Structural Empowerment: A Qualitative Phenomenological Study. *PLoS One* 2016;**11**(4):e0152654.
65. Oduro-Mensah E, Kwamie A, Antwi E, et al. Care decision making of frontline providers of maternal and newborn health services in the greater Accra region of Ghana. *PLoS One* 2013;**8**(2):e55610.
66. Rose DE, Tisnado DM, Tao ML, et al. Prevalence, predictors, and patient outcomes associated with physician co-management: findings from the Los Angeles Women's Health Study. *Health Serv Res* 2012;**47**(3 Pt 1):1091-116.
67. Lee King PA, Cederbaum JA, Kurzban S, et al. Role of patient treatment beliefs and provider characteristics in establishing patient-provider relationships. *Fam Pract* 2015;**32**(2):224-31.
68. Andoh-Adjei FX, Cornelissen D, Asante FA, et al. Does capitation payment under national health insurance affect subscribers' trust in their primary care provider? a cross-sectional survey of insurance subscribers in Ghana. *BMC Health Serv Res* 2016;**16**(1):437.
69. Zhang L, Stone TE, Zhang J. Understanding the rise of Yinao in China: A commentary on the little known phenomenon of healthcare violence. *Nurs Health Sci* 2016.
70. Peng W, Ding G, Tang Q, et al. Continuing violence against medical personnel in China: A flagrant violation of Chinese law. *Biosci Trends* 2016;**10**(3):240-3.
71. Hui EC. The contemporary healthcare crisis in China and the role of medical professionalism. *J Med Philos* 2010;**35**(4):477-92.
72. Huong DB, Phuong NK, Bales S, et al. Rural health care in Vietnam and China: conflict between market reforms and social need. *Int J Health Serv* 2007;**37**(3):555-72.
73. Hou J, Michaud C, Li Z, et al. Transformation of the education of health professionals in China: progress and challenges. *Lancet* 2014;**384**(9945):819-27.
74. Violence against doctors: Why China? Why now? What next? *Lancet* 2014;**383**(9922):1013.

1  
2  
3  
4  
5  
6  
7  
8  
9  
10  
11  
12  
13  
14  
15  
16  
17  
18  
19  
20  
21  
22  
23  
24  
25  
26  
27  
28  
29  
30  
31  
32  
33  
34  
35  
36  
37  
38  
39  
40  
41  
42  
43  
44  
45  
46  
47  
48  
49  
50  
51  
52  
53  
54  
55  
56  
57  
58  
59  
60



Figure 1 How patients make decisions when seeking health services

Figure 1 How patients make decisions when seeking health services

146x82mm (300 x 300 DPI)

review only

Appendix Table 1 The general characteristics of six MCH institutions

| Province | MCH institution | Number of |      |                             |                               |                             |
|----------|-----------------|-----------|------|-----------------------------|-------------------------------|-----------------------------|
|          |                 | Staff     | Beds | Outpatients (*1000per year) | Hospitalized (*1000 per year) | Deliveries (*1000 per year) |
| Hebei    | SJZ             | 1022      | 450  | 520                         | 21                            | 16                          |
|          | MC              | 90        | 40   | 15                          | 1.6                           | 1                           |
| Beijing  | XH              | 110       | 60   | 120                         | 2                             | 1                           |
|          | HD              | 729       | 460  | 740                         | 20                            | 14                          |
|          | CY              | 443       | 125  | 280                         | 6                             | 4                           |
|          | FT              | 362       | 120  | 280                         | 3.5                           | 2.2                         |

\*Rough data provided by administrative managers of those MCH institutions.

Appendix Table 2 The general characteristics of 118 participants

| Characteristics | Health workers (n1=79) |                        | Patients (n4=39) | Total (N=118) |           |
|-----------------|------------------------|------------------------|------------------|---------------|-----------|
|                 | Managers (n2=20)       | Care providers (n3=59) |                  |               |           |
| Sex             | Male                   | 5(25.0%)               | 3( 5.1%)         | 13(33.3%)     | 21(17.8%) |
|                 | Female                 | 15(75.0%)              | 56(94.9%)        | 26(66.7%)     | 97(82.2%) |
| Age             | 20-29 years            | 0( 0.0%)               | 8(13.6%)         | 16(41.0%)     | 24(20.3%) |
|                 | 30-39 years            | 7(35.0%)               | 33(55.9%)        | 13(33.3%)     | 53(44.9%) |
|                 | 40-49 years            | 9(45.0%)               | 16(27.1%)        | 1( 2.6%)      | 26(22.0%) |
|                 | 50-59 years            | 3(15.0%)               | 1( 1.7%)         | 4(10.3%)      | 8( 6.8%)  |
|                 | 60 years or above      | 1( 5.0%)               | 1( 1.7%)         | 0( 0.0%)      | 2( 1.7%)  |
| Education       | Missing                | 0( 0.0%)               | 0( 0.0%)         | 5(12.8%)      | 5( 4.2%)  |
|                 | Primaryorunder         | 0( 0.0%)               | 0( 0.0%)         | 4(10.3%)      | 4( 3.4%)  |
|                 | Secondary              | 0( 0.0%)               | 0( 0.0%)         | 7(17.9%)      | 7( 5.9%)  |
|                 | Juniorcollege          | 3(15.0%)               | 23(39.0%)        | 6(15.4%)      | 32(27.1%) |
|                 | Undergraduate          | 10(50.0%)              | 25(42.4%)        | 6(15.4%)      | 41(34.7%) |
|                 | Masterorabove          | 2(10.0%)               | 9(15.3%)         | 2( 5.1%)      | 13(11.0%) |
|                 | Missing                | 5(25.0%)               | 2( 3.4%)         | 14(35.9%)     | 21(17.8%) |

Appendix Table 3 Other general characteristics of 79 health workers

| Characteristics     |                   | Managers<br>(n2=20) | Care providers<br>(n3=59) | Total<br>(n1=79) |
|---------------------|-------------------|---------------------|---------------------------|------------------|
| Working years       | 0-4 years         | 0( 0.0%)            | 3( 5.1%)                  | 3( 3.8%)         |
|                     | 5-9 years         | 3(15.0%)            | 14(23.7%)                 | 17(21.5%)        |
|                     | 10 years or above | 17(85.0%)           | 42(71.2%)                 | 59(74.7%)        |
| Professional title* | Clinicians        | 7(35.0%)            | 14(23.7%)                 | 21(26.6%)        |
|                     | Public health     | 2(10.0%)            | 15(25.4%)                 | 17(21.5%)        |
|                     | Nurses            | 5(25.0%)            | 21(35.6%)                 | 26(32.9%)        |
|                     | Administrative    | 6(30.0%)            | 0( 0.0%)                  | 6( 7.6%)         |
|                     | Others            | 0( 0.0%)            | 9(15.3%)                  | 9(11.4%)         |

\*Professional title is a qualification authenticated by health administrative bureaus, which qualifies medical professionals' specialty legally. Most administrative managers of medical institutions in China had been promoted from frontline staff rather than specialized administrative managers.

Appendix Table 4 Dimensions and items of patient safety culture in MCH institutions

| Dimensions/items                                                                              | Health workers (n1=79) |                           |                  | Patients<br>(n4=39) | Total<br>(N=118) |
|-----------------------------------------------------------------------------------------------|------------------------|---------------------------|------------------|---------------------|------------------|
|                                                                                               | Managers<br>(n2=20)    | Care providers<br>(n3=59) |                  |                     |                  |
| <b>1. Management support</b>                                                                  | <b>19(95.0%)</b>       | <b>53(89.8%)</b>          | <b>17(43.6%)</b> | <b>89(75.4%)</b>    |                  |
| 1.1 Management gives priority to PS, considering other goals like profits or reputations.     | 10(50.0%)              | 14(23.7%)                 | 3( 7.7%)         | 27(22.9%)           |                  |
| 1.2 Management is committed to continuous improvement of PS.                                  | 13(65.0%)              | 27(45.8%)                 | 2( 5.1%)         | 42(35.6%)           |                  |
| 1.3 Management is committed to create a good working atmosphere.                              | 1( 5.0%)               | 1( 1.7%)                  | 0( 0.0%)         | 2( 1.7%)            |                  |
| 1.4 Management provides adequate allocation of resources to the department where I work.      | 2(10.0%)               | 15(25.4%)                 | 0( 0.0%)         | 17(14.4%)           |                  |
| 1.5 Management thinks highly of improving organizational environments and medical facilities. | 16(80.0%)              | 38(64.4%)                 | 14(35.9%)        | 68(57.6%)           |                  |
| 1.6 Management pays more attention to profit-making departments than others.                  | 6(30.0%)               | 11(18.6%)                 | 0( 0.0%)         | 17(14.4%)           |                  |
| <b>2.Regulation and procedure</b>                                                             | <b>19(95.0%)</b>       | <b>54(91.5%)</b>          | <b>13(33.3%)</b> | <b>86(72.9%)</b>    |                  |
| 2.1Innovations of regulations and procedures are rigorous and flexible.                       | 6(30.0%)               | 10(16.9%)                 | 1( 2.6%)         | 17(14.4%)           |                  |
| 2.2Motivatemechanism of the organization is fair and feasible.                                | 9(45.0%)               | 30(50.8%)                 | 0( 0.0%)         | 39(33.1%)           |                  |

|                                                                                                         |                  |                  |                  |                  |
|---------------------------------------------------------------------------------------------------------|------------------|------------------|------------------|------------------|
| 2.3 Some regulations and procedures are unreasonable and lead to inconveniences, barriers or risks.     | 14(70.0%)        | 37(62.7%)        | 13(33.3%)        | 64(54.2%)        |
| 2.4 Frontlines can obey regulations and procedures in the organization.                                 | 16(80.0%)        | 26(44.1%)        | 2( 5.1%)         | 44(37.3%)        |
| 2.5 Risk preventing and responding mechanism has been introduced to reduce or avoid errors.             | 6(30.0%)         | 15(25.4%)        | 0( 0.0%)         | 21(17.8%)        |
| 2.6 Frontline staff can be able to involve in decision-making.                                          | 3(15.0%)         | 10(16.9%)        | 0( 0.0%)         | 13(11.0%)        |
| <b>3. Staffing</b>                                                                                      | <b>16(80.0%)</b> | <b>52(88.1%)</b> | <b>16(41.0%)</b> | <b>84(71.2%)</b> |
| 3.1 I often feel busy too much.                                                                         | 3(15.0%)         | 9(15.3%)         | 4(10.3%)         | 16(13.6%)        |
| 3.2 Staffing is far from sufficient to deal with workload.                                              | 13(65.0%)        | 41(69.5%)        | 11(28.2%)        | 65(55.1%)        |
| 3.3 Because of overload working, we cannot provide patients the best services as we could.              | 13(65.0%)        | 48(81.4%)        | 10(25.6%)        | 71(60.2%)        |
| <b>4. Teamwork</b>                                                                                      | <b>13(65.0%)</b> | <b>47(79.7%)</b> | <b>5(12.8%)</b>  | <b>65(55.1%)</b> |
| 4.1 Referrals between the organization and other institutions are efficient to ensure PS.               | 5(25.0%)         | 9(15.3%)         | 3( 7.7%)         | 17(14.4%)        |
| 4.2 Cross-department teamwork in the organization is not satisfying.                                    | 9(45.0%)         | 34(57.6%)        | 1( 2.6%)         | 44(37.3%)        |
| 4.3 Communication is not pleasant between supervisors and subordinates.                                 | 3(15.0%)         | 3( 5.1%)         | 0( 0.0%)         | 6( 5.1%)         |
| 4.4 Handoffs are handled seriously and carefully.                                                       | 1( 5.0%)         | 8(13.6%)         | 0( 0.0%)         | 9( 7.6%)         |
| 4.5 Teamwork is satisfying in the department where I work.                                              | 8(40.0%)         | 31(52.5%)        | 1( 2.6%)         | 40(33.9%)        |
| <b>5. Non-punitive response to adverse events</b>                                                       | <b>17(85.0%)</b> | <b>42(71.2%)</b> | <b>6(15.4%)</b>  | <b>65(55.1%)</b> |
| 5.1 Frontlines might not report adverse events happened due to worries about punishments.               | 4(20.0%)         | 4( 6.8%)         | 0( 0.0%)         | 8( 6.8%)         |
| 5.2 Frontlines are encouraged to report adverse events.                                                 | 5(25.0%)         | 17(28.8%)        | 0( 0.0%)         | 22(18.6%)        |
| 5.3 Adverse events are mostly attributed to individuals in the organization.                            | 2(10.0%)         | 2( 3.4%)         | 6(15.4%)         | 10( 8.5%)        |
| 5.4 Feedback of adverse events reported is delivered in time.                                           | 3(15.0%)         | 7(11.9%)         | 0( 0.0%)         | 10( 8.5%)        |
| 5.5 Efforts are much engaged in preventing adverse events to reoccur.                                   | 2(10.0%)         | 18(30.5%)        | 0( 0.0%)         | 20(16.9%)        |
| 5.6 In the organization, it is preferred to learn from adverse events than blame or punish individuals. | 17(85.0%)        | 41(69.5%)        | 0( 0.0%)         | 58(49.2%)        |
| <b>6. Openness to adverse events</b>                                                                    | <b>10(50.0%)</b> | <b>38(64.4%)</b> | <b>0( 0.0%)</b>  | <b>48(40.7%)</b> |
| 6.1 If adverse event happen and might harm patients, I will report it.                                  | 8(40.0%)         | 21(35.6%)        | 0( 0.0%)         | 29(24.6%)        |
| 6.2 If adverse event happen but nearly not harm patients, I will report it as well.                     | 10(50.0%)        | 22(37.3%)        | 0( 0.0%)         | 32(27.1%)        |
| 6.3 If adverse event happen to colleagues, I will report it as well.                                    | 5(25.0%)         | 20(33.9%)        | 0( 0.0%)         | 25(21.2%)        |
| 6.4 If adverse event happen, individuals involved will be regarded by colleagues not as usual.          | 1( 5.0%)         | 7(11.9%)         | 0( 0.0%)         | 8( 6.8%)         |

1  
2  
3  
4  
5  
6  
7  
8  
9  
10  
11  
12  
13  
14  
15  
16  
17  
18  
19  
20  
21  
22  
23  
24  
25  
26  
27  
28  
29  
30  
31  
32  
33  
34  
35  
36  
37  
38  
39  
40  
41  
42  
43  
44  
45  
46  
47

|                                                                                                        |                   |                  |                  |                   |
|--------------------------------------------------------------------------------------------------------|-------------------|------------------|------------------|-------------------|
| 6.5 It is not superstitious to discuss adverse events among colleagues.                                | 5(25.0%)          | 25(42.4%)        | 0( 0.0%)         | 30(25.4%)         |
| 6.6 I am not worried about discussing my errors.                                                       | 2(10.0%)          | 4( 6.8%)         | 0( 0.0%)         | 6( 5.1%)          |
| 6.7 If adverse event happen and is not found by patient, he/she will be not informed to avoid dispute. | 3(15.0%)          | 12(20.3%)        | 0( 0.0%)         | 15(12.7%)         |
| 6.8 If adverse event happen, patient will be comforted to relieve feelings of unsafety.                | 5(25.0%)          | 6(10.2%)         | 0( 0.0%)         | 11( 9.3%)         |
| <b>7.Risk awareness and warning</b>                                                                    | <b>15(75.0%)</b>  | <b>44(74.6%)</b> | <b>13(33.3%)</b> | <b>72(61.0%)</b>  |
| 7.1 Besides incidents, management pay much attention to errors or potential risks as well.             | 3(15.0%)          | 6(10.2%)         | 0( 0.0%)         | 9( 7.6%)          |
| 7.2 If potential risks emerge, efforts will be much engaged to avoid reoccurring.                      | 7(35.0%)          | 17(28.8%)        | 0( 0.0%)         | 24(20.3%)         |
| 7.3 I cannot ignore errors and potential risks in work.                                                | 1( 5.0%)          | 5( 8.5%)         | 0( 0.0%)         | 6( 5.1%)          |
| 7.4 I agree that most of errors are preventable.                                                       | 6(30.0%)          | 16(27.1%)        | 2( 5.1%)         | 24(20.3%)         |
| 7.5 I agree that 'to err is human'.                                                                    | 6(30.0%)          | 17(28.8%)        | 6(15.4%)         | 29(24.6%)         |
| 7.6 I consider my work as part of PS.                                                                  | 11(55.0%)         | 26(44.1%)        | 2( 5.1%)         | 39(33.1%)         |
| <b>8.Continuous learning</b>                                                                           | <b>19(95.0%)</b>  | <b>55(93.2%)</b> | <b>20(51.3%)</b> | <b>94(79.7%)</b>  |
| 8.1 Continuous learning is considered as an important thing in the organization.                       | 15(75.0%)         | 40(67.8%)        | 4(10.3%)         | 59(50.0%)         |
| 8.2 Colleagues always discuss how to improve work.                                                     | 7(35.0%)          | 30(50.8%)        | 0( 0.0%)         | 37(31.4%)         |
| 8.3 I am competent to handle my job.                                                                   | 16(80.0%)         | 39(66.1%)        | 19(48.7%)        | 74(62.7%)         |
| 8.4 I need to learn continuously.                                                                      | 12(60.0%)         | 35(59.3%)        | 2( 5.1%)         | 49(41.5%)         |
| 8.5 New employees are trained enough to be acquainted with regulations and procedures.                 | 7(35.0%)          | 17(28.8%)        | 0( 0.0%)         | 24(20.3%)         |
| 8.6 Staff is trained enough (not limited to knowledge and skills).                                     | 10(50.0%)         | 40(67.8%)        | 1( 2.6%)         | 51(43.2%)         |
| <b>9.Working perception</b>                                                                            | <b>20(100.0%)</b> | <b>54(91.5%)</b> | <b>37(94.9%)</b> | <b>111(94.1%)</b> |
| 9.1 I have a sense of satisfaction and accomplishment in my work.                                      | 9(45.0%)          | 21(35.6%)        | 0( 0.0%)         | 30(25.4%)         |
| 9.2 I feel tired of my work.                                                                           | 13(65.0%)         | 22(37.3%)        | 2( 5.1%)         | 37(31.4%)         |
| 9.3 I can receive patients with compassion and empathy.                                                | 13(65.0%)         | 30(50.8%)        | 14(35.9%)        | 57(48.3%)         |
| 9.4 I can perform patience and kind attitudes in my work.                                              | 14(70.0%)         | 41(69.5%)        | 37(94.9%)        | 92(78.0%)         |
| 9.5 I work seriously and responsibly.                                                                  | 12(60.0%)         | 36(61.0%)        | 13(33.3%)        | 61(51.7%)         |
| <b>10.Providers' defensive behaviors</b>                                                               | <b>9(45.0%)</b>   | <b>22(37.3%)</b> | <b>9(23.1%)</b>  | <b>40(33.9%)</b>  |
| 10.1 To avoid high risk, we might refuse patients who we are able to treat in fact.                    | 2(10.0%)          | 9(15.3%)         | 0( 0.0%)         | 11( 9.3%)         |



|                                                                                                           |                  |                  |                  |                  |
|-----------------------------------------------------------------------------------------------------------|------------------|------------------|------------------|------------------|
| 10.2 To avoid dispute, I might yield to patient, rather than adhere to rules and guidelines.              | 5(25.0%)         | 15(25.4%)        | 2( 5.1%)         | 22(18.6%)        |
| 10.3 To avoid dispute, we have to do massive informed consents in writing or orally to protect ourselves. | 4(20.0%)         | 7(11.9%)         | 3( 7.7%)         | 14(11.9%)        |
| 10.4 Unnecessary interventions exist in the organization.                                                 | 3(15.0%)         | 2( 3.4%)         | 5(12.8%)         | 10( 8.5%)        |
| <b>11. Patient involvement</b>                                                                            | <b>15(75.0%)</b> | <b>44(74.6%)</b> | <b>34(87.2%)</b> | <b>93(78.8%)</b> |
| 11.1 I inform patients (like alternative plans and risks) as enough as I can.                             | 13(65.0%)        | 42(71.2%)        | 34(87.2%)        | 89(75.4%)        |
| 11.2 I response to any question of patients.                                                              | 0( 0.0%)         | 9(15.3%)         | 13(33.3%)        | 22(18.6%)        |
| 11.3 We often take advice from patients.                                                                  | 7(35.0%)         | 13(22.0%)        | 12(30.8%)        | 32(27.1%)        |
| 11.4 We emphasize health education to patients.                                                           | 5(25.0%)         | 19(32.2%)        | 7(17.9%)         | 31(26.3%)        |
| 11.5 I respect patient's willing and rights.                                                              | 4(20.0%)         | 21(35.6%)        | 7(17.9%)         | 32(27.1%)        |
| 11.6 Patients are encouraged to participate in risk management in the organization.                       | 4(20.0%)         | 13(22.0%)        | 9(23.1%)         | 26(22.0%)        |
| <b>12. MCH specific</b>                                                                                   | <b>6(30.0%)</b>  | <b>6(10.2%)</b>  | <b>0( 0.0%)</b>  | <b>12(10.2%)</b> |
| 12.1 Management doesn't support to complete all of public health tasks.                                   | 8(40.0%)         | 14(23.7%)        | 0( 0.0%)         | 22(18.6%)        |
| 12.2 Staffing allocated on public health is insufficient.                                                 | 4(20.0%)         | 7(11.9%)         | 0( 0.0%)         | 11( 9.3%)        |
| 12.3 Staffing allocation make priority to clinic departments rather than public health departments.       | 1( 5.0%)         | 1( 1.7%)         | 0( 0.0%)         | 2( 1.7%)         |
| 12.4 Our cooperation with other MCH institutions is satisfying.                                           | 4(20.0%)         | 13(22.0%)        | 1( 2.6%)         | 18(15.3%)        |
| 12.5 I agree that public health is very important and necessary part of a MCH institution.                | 6(30.0%)         | 4( 6.8%)         | 0( 0.0%)         | 10( 8.5%)        |
| 12.6 I agree that public health should be given more attentions than is now.                              | 3(15.0%)         | 1( 1.7%)         | 0( 0.0%)         | 4( 3.4%)         |
| 12.7 Public health workers are neglected frequently.                                                      | 0( 0.0%)         | 1( 1.7%)         | 0( 0.0%)         | 1( 0.8%)         |
| 12.8 Public health departments are prejudiced as 'special' in the organization.                           | 0( 0.0%)         | 3( 5.1%)         | 0( 0.0%)         | 3( 2.5%)         |

|    | Original codes                               |                                |   | Operational codes              |   | Final codes                    |
|----|----------------------------------------------|--------------------------------|---|--------------------------------|---|--------------------------------|
|    | <i>Researcher A</i>                          | <i>Researcher B</i>            |   |                                |   |                                |
| 1  |                                              |                                |   |                                |   |                                |
| 2  |                                              |                                |   |                                |   |                                |
| 3  |                                              |                                |   |                                |   |                                |
| 4  |                                              |                                |   |                                |   |                                |
| 5  |                                              |                                |   |                                |   |                                |
| 6  |                                              |                                |   |                                |   |                                |
| 7  |                                              |                                |   |                                |   |                                |
| 8  |                                              |                                |   |                                |   |                                |
| 9  | Concept of PS                                | Concept of PS                  |   | Concept of PS                  |   | Concept of PS                  |
| 10 |                                              |                                |   |                                |   |                                |
| 11 | Patient factors                              | Environmental factors          |   | Environmental factors          |   | Management support             |
| 12 | Medical industry                             |                                |   |                                |   | Regulation and procedure       |
| 13 | Policies and regulations                     | Management support             |   | Organizational structures      |   | Staffing                       |
| 14 | Legal                                        | Working atmosphere             |   | Working atmosphere             |   | Teamwork                       |
| 15 | social                                       | Individual factors             |   | Individual factors             |   | Non-punitive                   |
| 16 |                                              | Providers' defensive behaviors | → | Providers' defensive behaviors | → | Openness to adverse events     |
| 17 |                                              |                                |   |                                |   | Risk awareness and warning     |
| 18 | Organizational goals                         |                                |   |                                |   | Continuous learning            |
| 19 | Organizational structures                    | Patients' defensive behaviors  |   | Patients' defensive behaviors  |   | Working perception             |
| 20 | Organizational environment and facilities    |                                |   |                                |   | Providers' defensive behaviors |
| 21 | Individual perceptions, attitudes, behaviors |                                |   |                                |   | Patient involvement            |
| 22 |                                              |                                |   |                                |   | MCH specific                   |
| 23 |                                              |                                |   |                                |   |                                |
| 24 |                                              |                                |   |                                |   |                                |
| 25 |                                              |                                |   |                                |   |                                |
| 26 |                                              |                                |   |                                |   |                                |
| 27 |                                              |                                |   |                                |   |                                |
| 28 |                                              |                                |   |                                |   |                                |
| 29 |                                              |                                |   |                                |   | Environmental factors          |
| 30 |                                              |                                |   |                                |   | Patients' defensive behaviors  |
| 31 |                                              |                                |   |                                |   |                                |
| 32 |                                              |                                |   |                                |   |                                |
| 33 |                                              |                                |   |                                |   |                                |

**Appendix Figure 1 The modifying process of main dimensions coded by two parallel researchers**

*\*Not showing specific sub-dimensions and items in each main dimension, and some dimensions of final codes came from sub-dimensions of operational codes.*

Appendix Table 5 The coding reliability of 12 re-test cases

| No. of cases | Group         | Consistency reliability between researchers | Re-test reliability |
|--------------|---------------|---------------------------------------------|---------------------|
| 1            | Manager       | 85.0%                                       | 68.2%               |
| 2            | Manager       | 68.8%                                       | 66.7%               |
| 3            | Care provider | 79.4%                                       | 62.2%               |
| 4            | Care provider | 85.0%                                       | 73.9%               |
| 5            | Care provider | 66.7%                                       | 69.2%               |
| 6            | Care provider | 63.3%                                       | 66.1%               |
| 7            | Care provider | 75.6%                                       | 76.1%               |
| 8            | Care provider | 82.9%                                       | 82.5%               |
| 9            | Patient       | 100.0%                                      | 66.7%               |
| 10           | Patient       | 88.2%                                       | 73.7%               |
| 11           | Patient       | 92.9%                                       | 62.5%               |
| 12           | Patient       | 75.0%                                       | 63.9%               |

## Consolidated criteria for reporting qualitative studies (COREQ): 32-item checklist

| No                                             | Item                                     | Guide questions/description                                                                                                                      |            |
|------------------------------------------------|------------------------------------------|--------------------------------------------------------------------------------------------------------------------------------------------------|------------|
| <b>Domain 1: Research team and reflexivity</b> |                                          |                                                                                                                                                  |            |
| Personal Characteristics                       |                                          |                                                                                                                                                  |            |
| 1.                                             | Interviewer/facilitator                  | Which author/s conducted the interview or focus group?                                                                                           | Page 4     |
| 2.                                             | Credentials                              | What were the researcher's credentials? <i>E.g. PhD, MD</i>                                                                                      | Page 1,4   |
| 3.                                             | Occupation                               | What was their occupation at the time of the study?                                                                                              | Page 1,3   |
| 4.                                             | Gender                                   | Was the researcher male or female?                                                                                                               | Page 3     |
| 5.                                             | Experience and training                  | What experience or training did the researcher have?                                                                                             | Page 1,3,4 |
| Relationship with participants                 |                                          |                                                                                                                                                  |            |
| 6.                                             | Relationship established                 | Was a relationship established prior to study commencement?                                                                                      | Page 4     |
| 7.                                             | Participant knowledge of the interviewer | What did the participants know about the researcher? <i>e.g. personal goals, reasons for doing the research</i>                                  | Page 4     |
| 8.                                             | Interviewer characteristics              | What characteristics were reported about the interviewer/facilitator? <i>e.g. Bias, assumptions, reasons and interests in the research topic</i> | Page 1,3,4 |
| <b>Domain 2: Study design</b>                  |                                          |                                                                                                                                                  |            |
| Theoretical framework                          |                                          |                                                                                                                                                  |            |
| 10.                                            | Sampling                                 | How were participants selected? <i>e.g. purposive, convenience, consecutive, snowball</i>                                                        | Page 4     |
| 11.                                            | Method of approach                       | How were participants approached? <i>e.g. face-to-face, telephone, mail, email</i>                                                               | Page 4     |
| 12.                                            | Sample size                              | How many participants were in the study?                                                                                                         | Page 4     |
| 13.                                            | Non-participation                        | How many people refused to participate or dropped out? Reasons?                                                                                  | Page 4     |
| Setting                                        |                                          |                                                                                                                                                  |            |
| 14.                                            | Setting of data collection               | Where was the data collected? <i>e.g. home, clinic, workplace</i>                                                                                | Page 4     |
| 15.                                            | Presence of non-participants             | Was anyone else present besides the participants and researchers?                                                                                | Page 4,14  |
| 16.                                            | Description of sample                    | What are the important characteristics of the sample? <i>e.g. demographic data, date</i>                                                         | Page 4     |
| Data collection                                |                                          |                                                                                                                                                  |            |
| 17.                                            | Interview guide                          | Were questions, prompts, guides provided by the authors? Was it pilot tested?                                                                    | Page 4     |
| 18.                                            | Repeat interviews                        | Were repeat interviews carried out? If yes, how many?                                                                                            | Page 4     |
| 19.                                            | Audio/visual                             | Did the research use audio or visual recording to                                                                                                | Page 4     |

|                                        |                                |                                                                                                                                             |                                                                  |
|----------------------------------------|--------------------------------|---------------------------------------------------------------------------------------------------------------------------------------------|------------------------------------------------------------------|
|                                        | recording                      | collect the data?                                                                                                                           |                                                                  |
| 20.                                    | Field notes                    | Were field notes made during and/or after the interview or focus group?                                                                     | Page 4                                                           |
| 21.                                    | Duration                       | What was the duration of the interviews or focus group?                                                                                     | Page 4                                                           |
| 22.                                    | Data saturation                | Was data saturation discussed?                                                                                                              | Page 4                                                           |
| 23.                                    | Transcripts returned           | Were transcripts returned to participants for comment and/or correction?                                                                    | No, because we did not keep contact details of the participants. |
| <b>Domain 3: Analysis and findings</b> |                                |                                                                                                                                             |                                                                  |
| Data analysis                          |                                |                                                                                                                                             |                                                                  |
| 24.                                    | Number of data coders          | How many data coders coded the data?                                                                                                        | Page 5                                                           |
| 25.                                    | Description of the coding tree | Did authors provide a description of the coding tree?                                                                                       | Page 4-5                                                         |
| 26.                                    | Derivation of themes           | Were themes identified in advance or derived from the data?                                                                                 | Page 4-5                                                         |
| 27.                                    | Software                       | What software, if applicable, was used to manage the data?                                                                                  | Page 4                                                           |
| 28.                                    | Participant checking           | Did participants provide feedback on the findings?                                                                                          | No, because we did not keep contact details of the participants. |
| Reporting                              |                                |                                                                                                                                             |                                                                  |
| 29.                                    | Quotations presented           | Were participant quotations presented to illustrate the themes / findings? Was each quotation identified?<br><i>e.g. participant number</i> | Page 6-12                                                        |
| 30.                                    | Data and findings consistent   | Was there consistency between the data presented and the findings?                                                                          | Page 4-5, 12-14                                                  |
| 31.                                    | Clarity of major themes        | Were major themes clearly presented in the findings?                                                                                        | Page 5-12                                                        |
| 32.                                    | Clarity of minor themes        | Is there a description of diverse cases or discussion of minor themes?                                                                      | Page 5-12                                                        |
